# Supplementary material for: Transcriptome Analysis Reveals Long Intergenic Noncoding RNAs Contributed to Growth and Meat Quality Differences between Yorkshire and Wannanhua Pig
Source: Genes (Basel). 2017 Aug 18;8(8):203. doi: 10.3390/genes8080203 (PMC5575666; doi:10.3390/genes8080203)
Supplement: Supplementary file 1 [file genes-08-00203-s001.xlsx]

## Sheet: Table S1
Table S1: Information of all lincRNAs in this study
transcript_id	gene_id	chromosome	strand	transcript_start	transcript_end	exon_number	transcript_length	gene_type	known/novel
TCONS_00000046	XLOC_000021	1	+	6534806	6534984	1	874	lincRNA	novel
TCONS_00000046	XLOC_000021	1	+	6535481	6535752	2	874	lincRNA	novel
TCONS_00000046	XLOC_000021	1	+	6537532	6537954	3	874	lincRNA	novel
TCONS_00000089	XLOC_000042	1	+	10542661	10542800	1	4924	lincRNA	novel
TCONS_00000089	XLOC_000042	1	+	10544821	10549604	2	4924	lincRNA	novel
TCONS_00000134	XLOC_000060	1	+	17164252	17164630	1	3332	lincRNA	known
TCONS_00000134	XLOC_000060	1	+	17165701	17165937	2	3332	lincRNA	known
TCONS_00000134	XLOC_000060	1	+	17166553	17166657	3	3332	lincRNA	known
TCONS_00000134	XLOC_000060	1	+	17168677	17171287	4	3332	lincRNA	known
TCONS_00000243	XLOC_000105	1	+	31451437	31452016	1	1236	lincRNA	known
TCONS_00000243	XLOC_000105	1	+	31457545	31458200	2	1236	lincRNA	known
TCONS_00000244	XLOC_000106	1	+	31521832	31522880	1	1447	lincRNA	known
TCONS_00000244	XLOC_000106	1	+	31523732	31524129	2	1447	lincRNA	known
TCONS_00000264	XLOC_000114	1	+	34293244	34293474	1	965	lincRNA	novel
TCONS_00000264	XLOC_000114	1	+	34297603	34298336	2	965	lincRNA	novel
TCONS_00000366	XLOC_000164	1	+	49904609	49904727	1	333	lincRNA	known
TCONS_00000366	XLOC_000164	1	+	49931913	49932013	2	333	lincRNA	known
TCONS_00000366	XLOC_000164	1	+	49967686	49967743	3	333	lincRNA	known
TCONS_00000366	XLOC_000164	1	+	49972452	49972506	4	333	lincRNA	known
TCONS_00000365	XLOC_000164	1	+	49904609	49904727	1	333	lincRNA	known
TCONS_00000365	XLOC_000164	1	+	49922873	49922973	2	333	lincRNA	known
TCONS_00000365	XLOC_000164	1	+	49967686	49967743	3	333	lincRNA	known
TCONS_00000365	XLOC_000164	1	+	49972452	49972506	4	333	lincRNA	known
TCONS_00000368	XLOC_000164	1	+	49904611	49904727	1	394	lincRNA	known
TCONS_00000368	XLOC_000164	1	+	49922873	49922973	2	394	lincRNA	known
TCONS_00000368	XLOC_000164	1	+	49967686	49967743	3	394	lincRNA	known
TCONS_00000368	XLOC_000164	1	+	49977762	49977879	4	394	lincRNA	known
TCONS_00000413	XLOC_000185	1	+	58884034	58884123	1	1284	lincRNA	novel
TCONS_00000413	XLOC_000185	1	+	58888492	58888574	2	1284	lincRNA	novel
TCONS_00000413	XLOC_000185	1	+	58894989	58895061	3	1284	lincRNA	novel
TCONS_00000413	XLOC_000185	1	+	58896124	58897161	4	1284	lincRNA	novel
TCONS_00000459	XLOC_000202	1	+	62835199	62835967	1	841	lincRNA	novel
TCONS_00000459	XLOC_000202	1	+	62851103	62851174	2	841	lincRNA	novel
TCONS_00000463	XLOC_000203	1	+	62893735	62893811	1	2213	lincRNA	novel
TCONS_00000463	XLOC_000203	1	+	62914645	62916780	2	2213	lincRNA	novel
TCONS_00000464	XLOC_000203	1	+	62903775	62903921	1	2283	lincRNA	novel
TCONS_00000464	XLOC_000203	1	+	62914645	62916780	2	2283	lincRNA	novel
TCONS_00000465	XLOC_000203	1	+	62908032	62908079	1	2184	lincRNA	novel
TCONS_00000465	XLOC_000203	1	+	62914645	62916780	2	2184	lincRNA	novel
TCONS_00000466	XLOC_000204	1	+	62957117	62957185	1	819	lincRNA	known
TCONS_00000466	XLOC_000204	1	+	63013908	63014657	2	819	lincRNA	known
TCONS_00000520	XLOC_000235	1	+	81721562	81721849	1	343	lincRNA	known
TCONS_00000520	XLOC_000235	1	+	81725995	81726049	2	343	lincRNA	known
TCONS_00000531	XLOC_000239	1	+	82746954	82747080	1	1503	lincRNA	known
TCONS_00000531	XLOC_000239	1	+	82748978	82749087	2	1503	lincRNA	known
TCONS_00000531	XLOC_000239	1	+	82749617	82749809	3	1503	lincRNA	known
TCONS_00000531	XLOC_000239	1	+	82774142	82775214	4	1503	lincRNA	known
TCONS_00000585	XLOC_000256	1	+	86962235	86962510	1	1194	lincRNA	known
TCONS_00000585	XLOC_000256	1	+	86965716	86966633	2	1194	lincRNA	known
TCONS_00000588	XLOC_000256	1	+	86962464	86962510	1	2505	lincRNA	known
TCONS_00000588	XLOC_000256	1	+	86972570	86972737	2	2505	lincRNA	known
TCONS_00000588	XLOC_000256	1	+	86974423	86974621	3	2505	lincRNA	known
TCONS_00000588	XLOC_000256	1	+	86984682	86986772	4	2505	lincRNA	known
TCONS_00000592	XLOC_000256	1	+	86971855	86972737	1	3173	lincRNA	known
TCONS_00000592	XLOC_000256	1	+	86974423	86974621	2	3173	lincRNA	known
TCONS_00000592	XLOC_000256	1	+	86984682	86986772	3	3173	lincRNA	known
TCONS_00000593	XLOC_000256	1	+	86974136	86974621	1	2577	lincRNA	known
TCONS_00000593	XLOC_000256	1	+	86984682	86986772	2	2577	lincRNA	known
TCONS_00000742	XLOC_000321	1	+	117532010	117532192	1	1047	lincRNA	known
TCONS_00000742	XLOC_000321	1	+	117627069	117627932	2	1047	lincRNA	known
TCONS_00001226	XLOC_000508	1	+	154984106	154984561	1	1133	lincRNA	novel
TCONS_00001226	XLOC_000508	1	+	154986893	154987048	2	1133	lincRNA	novel
TCONS_00001226	XLOC_000508	1	+	154993017	154993537	3	1133	lincRNA	novel
TCONS_00001227	XLOC_000508	1	+	154984106	154984561	1	1687	lincRNA	novel
TCONS_00001227	XLOC_000508	1	+	154993017	154993259	2	1687	lincRNA	novel
TCONS_00001227	XLOC_000508	1	+	154994273	154994458	3	1687	lincRNA	novel
TCONS_00001227	XLOC_000508	1	+	154994737	154995538	4	1687	lincRNA	novel
TCONS_00001312	XLOC_000558	1	+	174178959	174179166	1	1420	lincRNA	novel
TCONS_00001312	XLOC_000558	1	+	174188027	174188198	2	1420	lincRNA	novel
TCONS_00001312	XLOC_000558	1	+	174189560	174190599	3	1420	lincRNA	novel
TCONS_00001313	XLOC_000558	1	+	174178979	174179166	1	1228	lincRNA	novel
TCONS_00001313	XLOC_000558	1	+	174189560	174190599	2	1228	lincRNA	novel
TCONS_00001314	XLOC_000558	1	+	174187418	174187454	1	1077	lincRNA	novel
TCONS_00001314	XLOC_000558	1	+	174189560	174190599	2	1077	lincRNA	novel
TCONS_00001514	XLOC_000658	1	+	204239184	204239431	1	1445	lincRNA	novel
TCONS_00001514	XLOC_000658	1	+	204245220	204246416	2	1445	lincRNA	novel
TCONS_00001653	XLOC_000720	1	+	219930534	219930711	1	958	lincRNA	novel
TCONS_00001653	XLOC_000720	1	+	219933724	219934503	2	958	lincRNA	novel
TCONS_00001726	XLOC_000769	1	+	227953145	227953316	1	767	lincRNA	novel
TCONS_00001726	XLOC_000769	1	+	227981764	227982358	2	767	lincRNA	novel
TCONS_00001723	XLOC_000769	1	+	227953145	227953316	1	1131	lincRNA	known
TCONS_00001723	XLOC_000769	1	+	227956547	227956720	2	1131	lincRNA	known
TCONS_00001723	XLOC_000769	1	+	227956803	227956992	3	1131	lincRNA	known
TCONS_00001723	XLOC_000769	1	+	227981764	227982358	4	1131	lincRNA	known
TCONS_00001740	XLOC_000774	1	+	232726196	232726246	1	775	lincRNA	novel
TCONS_00001740	XLOC_000774	1	+	232792268	232792991	2	775	lincRNA	novel
TCONS_00001804	XLOC_000807	1	+	245181818	245181987	1	2554	lincRNA	known
TCONS_00001804	XLOC_000807	1	+	245197179	245197373	2	2554	lincRNA	known
TCONS_00001804	XLOC_000807	1	+	245197899	245197999	3	2554	lincRNA	known
TCONS_00001804	XLOC_000807	1	+	245209387	245209525	4	2554	lincRNA	known
TCONS_00001804	XLOC_000807	1	+	245211995	245212209	5	2554	lincRNA	known
TCONS_00001804	XLOC_000807	1	+	245235947	245237680	6	2554	lincRNA	known
TCONS_00001805	XLOC_000807	1	+	245181818	245181987	1	1755	lincRNA	known
TCONS_00001805	XLOC_000807	1	+	245197179	245197373	2	1755	lincRNA	known
TCONS_00001805	XLOC_000807	1	+	245197899	245197999	3	1755	lincRNA	known
TCONS_00001805	XLOC_000807	1	+	245209387	245209525	4	1755	lincRNA	known
TCONS_00001805	XLOC_000807	1	+	245211995	245212209	5	1755	lincRNA	known
TCONS_00001805	XLOC_000807	1	+	245235947	245236128	6	1755	lincRNA	known
TCONS_00001805	XLOC_000807	1	+	245237868	245238620	7	1755	lincRNA	known
TCONS_00001989	XLOC_000887	1	+	266683902	266684176	1	458	lincRNA	known
TCONS_00001989	XLOC_000887	1	+	266688415	266688539	2	458	lincRNA	known
TCONS_00001989	XLOC_000887	1	+	266688638	266688695	3	458	lincRNA	known
TCONS_00001999	XLOC_000892	1	+	267431642	267431825	1	263	lincRNA	known
TCONS_00001999	XLOC_000892	1	+	267452617	267452695	2	263	lincRNA	known
TCONS_00002032	XLOC_000905	1	+	269307670	269307863	1	319	lincRNA	known
TCONS_00002032	XLOC_000905	1	+	269314244	269314368	2	319	lincRNA	known
TCONS_00002427	XLOC_001073	1	+	303591826	303591900	1	821	lincRNA	known
TCONS_00002427	XLOC_001073	1	+	303599807	303599951	2	821	lincRNA	known
TCONS_00002427	XLOC_001073	1	+	303602325	303602925	3	821	lincRNA	known
TCONS_00002549	XLOC_001111	1	+	307527940	307528067	1	1068	lincRNA	known
TCONS_00002549	XLOC_001111	1	+	307530338	307531277	2	1068	lincRNA	known
TCONS_00002560	XLOC_001116	1	+	308368993	308369069	1	718	lincRNA	novel
TCONS_00002560	XLOC_001116	1	+	308371744	308372384	2	718	lincRNA	novel
TCONS_00002641	XLOC_001158	1	+	312946638	312946909	1	974	lincRNA	novel
TCONS_00002641	XLOC_001158	1	+	312952026	312952727	2	974	lincRNA	novel
TCONS_00002819	XLOC_001234	1	-	15692826	15693757	1	1344	lincRNA	novel
TCONS_00002819	XLOC_001234	1	-	15696055	15696466	2	1344	lincRNA	novel
TCONS_00002862	XLOC_001252	1	-	18972581	18972922	1	768	lincRNA	known
TCONS_00002862	XLOC_001252	1	-	18978719	18978859	2	768	lincRNA	known
TCONS_00002862	XLOC_001252	1	-	18999710	18999994	3	768	lincRNA	known
TCONS_00002863	XLOC_001252	1	-	18972581	18972922	1	679	lincRNA	known
TCONS_00002863	XLOC_001252	1	-	18999710	19000046	2	679	lincRNA	known
TCONS_00002864	XLOC_001252	1	-	18994187	18994223	1	332	lincRNA	known
TCONS_00002864	XLOC_001252	1	-	18999710	19000004	2	332	lincRNA	known
TCONS_00002938	XLOC_001288	1	-	31634967	31636308	1	1567	lincRNA	novel
TCONS_00002938	XLOC_001288	1	-	31636978	31637202	2	1567	lincRNA	novel
TCONS_00003026	XLOC_001334	1	-	43684736	43691889	1	7779	lincRNA	novel
TCONS_00003026	XLOC_001334	1	-	43692045	43692669	2	7779	lincRNA	novel
TCONS_00003027	XLOC_001334	1	-	43684736	43690357	1	7695	lincRNA	novel
TCONS_00003027	XLOC_001334	1	-	43690599	43692671	2	7695	lincRNA	novel
TCONS_00003054	XLOC_001346	1	-	48793704	48794515	1	1305	lincRNA	novel
TCONS_00003054	XLOC_001346	1	-	48795049	48795150	2	1305	lincRNA	novel
TCONS_00003054	XLOC_001346	1	-	48806404	48806485	3	1305	lincRNA	novel
TCONS_00003054	XLOC_001346	1	-	48807151	48807231	4	1305	lincRNA	novel
TCONS_00003054	XLOC_001346	1	-	48815797	48816024	5	1305	lincRNA	novel
TCONS_00003057	XLOC_001349	1	-	49297777	49300031	1	2425	lincRNA	known
TCONS_00003057	XLOC_001349	1	-	49359310	49359384	2	2425	lincRNA	known
TCONS_00003057	XLOC_001349	1	-	49359736	49359830	3	2425	lincRNA	known
TCONS_00003060	XLOC_001349	1	-	49297777	49300031	1	2628	lincRNA	known
TCONS_00003060	XLOC_001349	1	-	49359310	49359384	2	2628	lincRNA	known
TCONS_00003060	XLOC_001349	1	-	49360617	49360914	3	2628	lincRNA	known
TCONS_00003058	XLOC_001349	1	-	49297777	49300031	1	3084	lincRNA	known
TCONS_00003058	XLOC_001349	1	-	49300447	49300628	2	3084	lincRNA	known
TCONS_00003058	XLOC_001349	1	-	49301705	49301898	3	3084	lincRNA	known
TCONS_00003058	XLOC_001349	1	-	49303802	49303881	4	3084	lincRNA	known
TCONS_00003058	XLOC_001349	1	-	49359310	49359384	5	3084	lincRNA	known
TCONS_00003058	XLOC_001349	1	-	49360617	49360914	6	3084	lincRNA	known
TCONS_00003192	XLOC_001408	1	-	72356463	72357897	1	1489	lincRNA	known
TCONS_00003192	XLOC_001408	1	-	72381430	72381483	2	1489	lincRNA	known
TCONS_00003356	XLOC_001470	1	-	90078671	90078715	1	389	lincRNA	known
TCONS_00003356	XLOC_001470	1	-	90139754	90139900	2	389	lincRNA	known
TCONS_00003356	XLOC_001470	1	-	90197664	90197860	3	389	lincRNA	known
TCONS_00003656	XLOC_001587	1	-	128191266	128191297	1	462	lincRNA	novel
TCONS_00003656	XLOC_001587	1	-	128197190	128197307	2	462	lincRNA	novel
TCONS_00003656	XLOC_001587	1	-	128198744	128199055	3	462	lincRNA	novel
TCONS_00003888	XLOC_001688	1	-	147457918	147457979	1	368	lincRNA	known
TCONS_00003888	XLOC_001688	1	-	147530744	147530891	2	368	lincRNA	known
TCONS_00003888	XLOC_001688	1	-	147535910	147536067	3	368	lincRNA	known
TCONS_00004066	XLOC_001772	1	-	179206131	179207565	1	3408	lincRNA	known
TCONS_00004066	XLOC_001772	1	-	179207817	179209789	2	3408	lincRNA	known
TCONS_00004481	XLOC_001951	1	-	231656446	231657711	1	3855	lincRNA	novel
TCONS_00004481	XLOC_001951	1	-	231657827	231660415	2	3855	lincRNA	novel
TCONS_00004482	XLOC_001952	1	-	231924065	231925107	1	1596	lincRNA	known
TCONS_00004482	XLOC_001952	1	-	231927714	231927936	2	1596	lincRNA	known
TCONS_00004482	XLOC_001952	1	-	231928593	231928781	3	1596	lincRNA	known
TCONS_00004482	XLOC_001952	1	-	231934747	231934887	4	1596	lincRNA	known
TCONS_00004483	XLOC_001953	1	-	232550270	232550784	1	779	lincRNA	novel
TCONS_00004483	XLOC_001953	1	-	232583214	232583374	2	779	lincRNA	novel
TCONS_00004483	XLOC_001953	1	-	232639433	232639535	3	779	lincRNA	novel
TCONS_00004484	XLOC_001953	1	-	232567394	232567583	1	454	lincRNA	novel
TCONS_00004484	XLOC_001953	1	-	232583214	232583374	2	454	lincRNA	novel
TCONS_00004484	XLOC_001953	1	-	232639433	232639535	3	454	lincRNA	novel
TCONS_00004550	XLOC_001984	1	-	245115123	245115253	1	518	lincRNA	known
TCONS_00004550	XLOC_001984	1	-	245120448	245120696	2	518	lincRNA	known
TCONS_00004550	XLOC_001984	1	-	245127085	245127222	3	518	lincRNA	known
TCONS_00004620	XLOC_002015	1	-	256584128	256586319	1	2521	lincRNA	novel
TCONS_00004620	XLOC_002015	1	-	256641623	256641757	2	2521	lincRNA	novel
TCONS_00004620	XLOC_002015	1	-	256665103	256665241	3	2521	lincRNA	novel
TCONS_00004620	XLOC_002015	1	-	256665523	256665577	4	2521	lincRNA	novel
TCONS_00004621	XLOC_002015	1	-	256584128	256586319	1	2657	lincRNA	novel
TCONS_00004621	XLOC_002015	1	-	256641623	256641757	2	2657	lincRNA	novel
TCONS_00004621	XLOC_002015	1	-	256665103	256665241	3	2657	lincRNA	novel
TCONS_00004621	XLOC_002015	1	-	256665566	256665756	4	2657	lincRNA	novel
TCONS_00004622	XLOC_002015	1	-	256584128	256586319	1	2406	lincRNA	novel
TCONS_00004622	XLOC_002015	1	-	256665103	256665241	2	2406	lincRNA	novel
TCONS_00004622	XLOC_002015	1	-	256668543	256668617	3	2406	lincRNA	novel
TCONS_00004624	XLOC_002015	1	-	256584128	256586319	1	2557	lincRNA	novel
TCONS_00004624	XLOC_002015	1	-	256665103	256665241	2	2557	lincRNA	novel
TCONS_00004624	XLOC_002015	1	-	256668623	256668848	3	2557	lincRNA	novel
TCONS_00004780	XLOC_002091	1	-	278859391	278862931	1	3725	lincRNA	known
TCONS_00004780	XLOC_002091	1	-	278874854	278874926	2	3725	lincRNA	known
TCONS_00004780	XLOC_002091	1	-	278878023	278878133	3	3725	lincRNA	known
TCONS_00004936	XLOC_002160	1	-	293389141	293389170	1	207	lincRNA	known
TCONS_00004936	XLOC_002160	1	-	293407642	293407725	2	207	lincRNA	known
TCONS_00004936	XLOC_002160	1	-	293419266	293419358	3	207	lincRNA	known
TCONS_00004938	XLOC_002160	1	-	293392472	293393277	1	969	lincRNA	known
TCONS_00004938	XLOC_002160	1	-	293407642	293407725	2	969	lincRNA	known
TCONS_00004938	XLOC_002160	1	-	293419266	293419344	3	969	lincRNA	known
TCONS_00004948	XLOC_002165	1	-	293747361	293747481	1	452	lincRNA	known
TCONS_00004948	XLOC_002165	1	-	293750060	293750390	2	452	lincRNA	known
TCONS_00005017	XLOC_002202	1	-	297754630	297755113	1	1111	lincRNA	known
TCONS_00005017	XLOC_002202	1	-	297763612	297763961	2	1111	lincRNA	known
TCONS_00005017	XLOC_002202	1	-	297768736	297769012	3	1111	lincRNA	known
TCONS_00005219	XLOC_002285	1	-	307525665	307526994	1	1498	lincRNA	known
TCONS_00005219	XLOC_002285	1	-	307527637	307527804	2	1498	lincRNA	known
TCONS_00005220	XLOC_002285	1	-	307525665	307526994	1	3092	lincRNA	known
TCONS_00005220	XLOC_002285	1	-	307527639	307529400	2	3092	lincRNA	known
TCONS_00005225	XLOC_002286	1	-	307531275	307532076	1	1260	lincRNA	novel
TCONS_00005225	XLOC_002286	1	-	307532678	307533135	2	1260	lincRNA	novel
TCONS_00005771	XLOC_002761	10	+	13135510	13135650	1	2393	lincRNA	known
TCONS_00005771	XLOC_002761	10	+	13141521	13143772	2	2393	lincRNA	known
TCONS_00005783	XLOC_002767	10	+	14850167	14852252	1	2109	lincRNA	novel
TCONS_00005783	XLOC_002767	10	+	14852359	14852381	2	2109	lincRNA	novel
TCONS_00005785	XLOC_002768	10	+	14879209	14879292	1	1959	lincRNA	known
TCONS_00005785	XLOC_002768	10	+	14880316	14880412	2	1959	lincRNA	known
TCONS_00005785	XLOC_002768	10	+	14881976	14882855	3	1959	lincRNA	known
TCONS_00005785	XLOC_002768	10	+	14882951	14883848	4	1959	lincRNA	known
TCONS_00005787	XLOC_002768	10	+	14879219	14879292	1	496	lincRNA	novel
TCONS_00005787	XLOC_002768	10	+	14880316	14880737	2	496	lincRNA	novel
TCONS_00005800	XLOC_002773	10	+	15197909	15198053	1	701	lincRNA	known
TCONS_00005800	XLOC_002773	10	+	15213416	15213971	2	701	lincRNA	known
TCONS_00005926	XLOC_002821	10	+	28210502	28210631	1	1539	lincRNA	known
TCONS_00005926	XLOC_002821	10	+	28212346	28212439	2	1539	lincRNA	known
TCONS_00005926	XLOC_002821	10	+	28213122	28214436	3	1539	lincRNA	known
TCONS_00005927	XLOC_002821	10	+	28212378	28212415	1	1509	lincRNA	known
TCONS_00005927	XLOC_002821	10	+	28212966	28214436	2	1509	lincRNA	known
TCONS_00006121	XLOC_002897	10	+	46417769	46417879	1	1313	lincRNA	known
TCONS_00006121	XLOC_002897	10	+	46425189	46426390	2	1313	lincRNA	known
TCONS_00006127	XLOC_002899	10	+	46803826	46804162	1	562	lincRNA	known
TCONS_00006127	XLOC_002899	10	+	46806431	46806655	2	562	lincRNA	known
TCONS_00006136	XLOC_002903	10	+	47715787	47716146	1	1125	lincRNA	novel
TCONS_00006136	XLOC_002903	10	+	47716307	47716369	2	1125	lincRNA	novel
TCONS_00006136	XLOC_002903	10	+	47718086	47718395	3	1125	lincRNA	novel
TCONS_00006136	XLOC_002903	10	+	47720122	47720513	4	1125	lincRNA	novel
TCONS_00006239	XLOC_002953	10	+	61848012	61848073	1	1067	lincRNA	known
TCONS_00006239	XLOC_002953	10	+	61848706	61849018	2	1067	lincRNA	known
TCONS_00006239	XLOC_002953	10	+	61849933	61850021	3	1067	lincRNA	known
TCONS_00006239	XLOC_002953	10	+	61850940	61851131	4	1067	lincRNA	known
TCONS_00006239	XLOC_002953	10	+	62001838	62002100	5	1067	lincRNA	known
TCONS_00006239	XLOC_002953	10	+	62005767	62005914	6	1067	lincRNA	known
TCONS_00006324	XLOC_002994	10	+	72939508	72939676	1	1174	lincRNA	known
TCONS_00006324	XLOC_002994	10	+	72941914	72942090	2	1174	lincRNA	known
TCONS_00006324	XLOC_002994	10	+	72943186	72944013	3	1174	lincRNA	known
TCONS_00006396	XLOC_003033	10	-	10602920	10603555	1	1012	lincRNA	known
TCONS_00006396	XLOC_003033	10	-	10646132	10646291	2	1012	lincRNA	known
TCONS_00006396	XLOC_003033	10	-	10655007	10655222	3	1012	lincRNA	known
TCONS_00006397	XLOC_003033	10	-	10602920	10603555	1	1549	lincRNA	known
TCONS_00006397	XLOC_003033	10	-	10627140	10627219	2	1549	lincRNA	known
TCONS_00006397	XLOC_003033	10	-	10646132	10646291	3	1549	lincRNA	known
TCONS_00006397	XLOC_003033	10	-	10655007	10655162	4	1549	lincRNA	known
TCONS_00006397	XLOC_003033	10	-	10704791	10704901	5	1549	lincRNA	known
TCONS_00006397	XLOC_003033	10	-	10717369	10717707	6	1549	lincRNA	known
TCONS_00006397	XLOC_003033	10	-	10736806	10736872	7	1549	lincRNA	known
TCONS_00006437	XLOC_003051	10	-	13117827	13118681	1	925	lincRNA	known
TCONS_00006437	XLOC_003051	10	-	13119066	13119135	2	925	lincRNA	known
TCONS_00006438	XLOC_003052	10	-	13283748	13285295	1	1801	lincRNA	known
TCONS_00006438	XLOC_003052	10	-	13285426	13285678	2	1801	lincRNA	known
TCONS_00006475	XLOC_003068	10	-	14850167	14852254	1	2104	lincRNA	novel
TCONS_00006475	XLOC_003068	10	-	14852343	14852358	2	2104	lincRNA	novel
TCONS_00006476	XLOC_003068	10	-	14850167	14852254	1	2109	lincRNA	novel
TCONS_00006476	XLOC_003068	10	-	14852361	14852381	2	2109	lincRNA	novel
TCONS_00006602	XLOC_003123	10	-	28033566	28034132	1	1081	lincRNA	known
TCONS_00006602	XLOC_003123	10	-	28036706	28036866	2	1081	lincRNA	known
TCONS_00006602	XLOC_003123	10	-	28038584	28038936	3	1081	lincRNA	known
TCONS_00006603	XLOC_003123	10	-	28037464	28037661	1	485	lincRNA	known
TCONS_00006603	XLOC_003123	10	-	28038584	28038870	2	485	lincRNA	known
TCONS_00006662	XLOC_003152	10	-	30841633	30841886	1	962	lincRNA	known
TCONS_00006662	XLOC_003152	10	-	30842790	30843002	2	962	lincRNA	known
TCONS_00006662	XLOC_003152	10	-	30843887	30843940	3	962	lincRNA	known
TCONS_00006662	XLOC_003152	10	-	30844398	30844703	4	962	lincRNA	known
TCONS_00006662	XLOC_003152	10	-	30845141	30845275	5	962	lincRNA	known
TCONS_00006674	XLOC_003162	10	-	32935429	32935838	1	939	lincRNA	known
TCONS_00006674	XLOC_003162	10	-	32946765	32946890	2	939	lincRNA	known
TCONS_00006674	XLOC_003162	10	-	33023675	33023737	3	939	lincRNA	known
TCONS_00006674	XLOC_003162	10	-	33025137	33025303	4	939	lincRNA	known
TCONS_00006674	XLOC_003162	10	-	33025718	33025806	5	939	lincRNA	known
TCONS_00006674	XLOC_003162	10	-	33037200	33037283	6	939	lincRNA	known
TCONS_00006675	XLOC_003162	10	-	32946194	32946427	1	770	lincRNA	novel
TCONS_00006675	XLOC_003162	10	-	32946765	32946890	2	770	lincRNA	novel
TCONS_00006675	XLOC_003162	10	-	33023675	33023737	3	770	lincRNA	novel
TCONS_00006675	XLOC_003162	10	-	33025137	33025344	4	770	lincRNA	novel
TCONS_00006675	XLOC_003162	10	-	33025718	33025806	5	770	lincRNA	novel
TCONS_00006675	XLOC_003162	10	-	33035954	33036003	6	770	lincRNA	novel
TCONS_00006676	XLOC_003162	10	-	32946766	32946890	1	843	lincRNA	novel
TCONS_00006676	XLOC_003162	10	-	33023675	33023737	2	843	lincRNA	novel
TCONS_00006676	XLOC_003162	10	-	33025137	33025344	3	843	lincRNA	novel
TCONS_00006676	XLOC_003162	10	-	33025718	33025806	4	843	lincRNA	novel
TCONS_00006676	XLOC_003162	10	-	33037200	33037308	5	843	lincRNA	novel
TCONS_00006676	XLOC_003162	10	-	33037876	33038124	6	843	lincRNA	novel
TCONS_00006677	XLOC_003162	10	-	32946766	32946890	1	839	lincRNA	novel
TCONS_00006677	XLOC_003162	10	-	33023675	33023737	2	839	lincRNA	novel
TCONS_00006677	XLOC_003162	10	-	33025137	33025344	3	839	lincRNA	novel
TCONS_00006677	XLOC_003162	10	-	33025718	33025806	4	839	lincRNA	novel
TCONS_00006677	XLOC_003162	10	-	33037214	33037308	5	839	lincRNA	novel
TCONS_00006677	XLOC_003162	10	-	33037876	33038134	6	839	lincRNA	novel
TCONS_00006786	XLOC_003207	10	-	45718341	45718827	1	666	lincRNA	known
TCONS_00006786	XLOC_003207	10	-	45719914	45720092	2	666	lincRNA	known
TCONS_00006787	XLOC_003207	10	-	45718341	45718827	1	1150	lincRNA	known
TCONS_00006787	XLOC_003207	10	-	45728965	45729627	2	1150	lincRNA	known
TCONS_00006788	XLOC_003207	10	-	45718341	45718827	1	691	lincRNA	known
TCONS_00006788	XLOC_003207	10	-	45755013	45755112	2	691	lincRNA	known
TCONS_00006788	XLOC_003207	10	-	45783275	45783378	3	691	lincRNA	known
TCONS_00006962	XLOC_003265	10	-	62380703	62382390	1	2080	lincRNA	known
TCONS_00006962	XLOC_003265	10	-	62384316	62384408	2	2080	lincRNA	known
TCONS_00006962	XLOC_003265	10	-	62385029	62385327	3	2080	lincRNA	known
TCONS_00006963	XLOC_003265	10	-	62383482	62384408	1	1226	lincRNA	known
TCONS_00006963	XLOC_003265	10	-	62385029	62385327	2	1226	lincRNA	known
TCONS_00007096	XLOC_003317	10	-	78895908	78895968	1	502	lincRNA	novel
TCONS_00007096	XLOC_003317	10	-	78897302	78897384	2	502	lincRNA	novel
TCONS_00007096	XLOC_003317	10	-	79051488	79051719	3	502	lincRNA	novel
TCONS_00007096	XLOC_003317	10	-	79054549	79054674	4	502	lincRNA	novel
TCONS_00007240	XLOC_003448	11	+	3482261	3482550	1	1024	lincRNA	known
TCONS_00007240	XLOC_003448	11	+	3482776	3482833	2	1024	lincRNA	known
TCONS_00007240	XLOC_003448	11	+	3483019	3483193	3	1024	lincRNA	known
TCONS_00007240	XLOC_003448	11	+	3483546	3484046	4	1024	lincRNA	known
TCONS_00007289	XLOC_003468	11	+	6897931	6898251	1	659	lincRNA	novel
TCONS_00007289	XLOC_003468	11	+	6899688	6900025	2	659	lincRNA	novel
TCONS_00007290	XLOC_003468	11	+	6898103	6898251	1	510	lincRNA	novel
TCONS_00007290	XLOC_003468	11	+	6899665	6900025	2	510	lincRNA	novel
TCONS_00007377	XLOC_003504	11	+	14962746	14962857	1	1797	lincRNA	known
TCONS_00007377	XLOC_003504	11	+	14963444	14964755	2	1797	lincRNA	known
TCONS_00007377	XLOC_003504	11	+	14967924	14967995	3	1797	lincRNA	known
TCONS_00007377	XLOC_003504	11	+	14969775	14969857	4	1797	lincRNA	known
TCONS_00007377	XLOC_003504	11	+	14978771	14978988	5	1797	lincRNA	known
TCONS_00007443	XLOC_003524	11	+	19504090	19504300	1	1660	lincRNA	novel
TCONS_00007443	XLOC_003524	11	+	19507923	19509371	2	1660	lincRNA	novel
TCONS_00007471	XLOC_003538	11	+	22388481	22388730	1	1036	lincRNA	novel
TCONS_00007471	XLOC_003538	11	+	22388963	22389748	2	1036	lincRNA	novel
TCONS_00007490	XLOC_003548	11	+	26321436	26321748	1	590	lincRNA	novel
TCONS_00007490	XLOC_003548	11	+	26321843	26322016	2	590	lincRNA	novel
TCONS_00007490	XLOC_003548	11	+	26323317	26323419	3	590	lincRNA	novel
TCONS_00007783	XLOC_003691	11	-	3471749	3471857	1	718	lincRNA	known
TCONS_00007783	XLOC_003691	11	-	3472001	3472609	2	718	lincRNA	known
TCONS_00007831	XLOC_003711	11	-	6898103	6899229	1	1282	lincRNA	known
TCONS_00007831	XLOC_003711	11	-	6899328	6899482	2	1282	lincRNA	known
TCONS_00007855	XLOC_003721	11	-	11035329	11037647	1	2511	lincRNA	known
TCONS_00007855	XLOC_003721	11	-	11037891	11038004	2	2511	lincRNA	known
TCONS_00007855	XLOC_003721	11	-	11054780	11054857	3	2511	lincRNA	known
TCONS_00007856	XLOC_003721	11	-	11035329	11038004	1	3022	lincRNA	known
TCONS_00007856	XLOC_003721	11	-	11054780	11054898	2	3022	lincRNA	known
TCONS_00007856	XLOC_003721	11	-	11059548	11059710	3	3022	lincRNA	known
TCONS_00007856	XLOC_003721	11	-	11061254	11061317	4	3022	lincRNA	known
TCONS_00007857	XLOC_003721	11	-	11035329	11038004	1	2990	lincRNA	known
TCONS_00007857	XLOC_003721	11	-	11059548	11059710	2	2990	lincRNA	known
TCONS_00007857	XLOC_003721	11	-	11140386	11140449	3	2990	lincRNA	known
TCONS_00007857	XLOC_003721	11	-	11140629	11140715	4	2990	lincRNA	known
TCONS_00007946	XLOC_003754	11	-	18740115	18741228	1	1599	lincRNA	novel
TCONS_00007946	XLOC_003754	11	-	18858029	18858149	2	1599	lincRNA	novel
TCONS_00007946	XLOC_003754	11	-	18860021	18860384	3	1599	lincRNA	novel
TCONS_00007984	XLOC_003772	11	-	22778638	22779542	1	1831	lincRNA	known
TCONS_00007984	XLOC_003772	11	-	22779765	22780690	2	1831	lincRNA	known
TCONS_00007991	XLOC_003776	11	-	24079295	24079866	1	1120	lincRNA	novel
TCONS_00007991	XLOC_003776	11	-	24080557	24081104	2	1120	lincRNA	novel
TCONS_00008121	XLOC_003829	11	-	56949114	56949327	1	439	lincRNA	known
TCONS_00008121	XLOC_003829	11	-	56949624	56949848	2	439	lincRNA	known
TCONS_00008232	XLOC_003885	11	-	83686948	83687409	1	6053	lincRNA	known
TCONS_00008232	XLOC_003885	11	-	83693140	83697393	2	6053	lincRNA	known
TCONS_00008232	XLOC_003885	11	-	83699024	83700360	3	6053	lincRNA	known
TCONS_00008239	XLOC_003885	11	-	83695829	83697390	1	2899	lincRNA	known
TCONS_00008239	XLOC_003885	11	-	83699024	83700360	2	2899	lincRNA	known
TCONS_00008237	XLOC_003885	11	-	83695829	83697389	1	2899	lincRNA	known
TCONS_00008237	XLOC_003885	11	-	83699023	83700360	2	2899	lincRNA	known
TCONS_00008268	XLOC_003898	11	-	86485522	86486209	1	1134	lincRNA	known
TCONS_00008268	XLOC_003898	11	-	86487881	86488078	2	1134	lincRNA	known
TCONS_00008268	XLOC_003898	11	-	86488689	86488936	3	1134	lincRNA	known
TCONS_00008401	XLOC_004009	12	+	686786	687074	1	1423	lincRNA	known
TCONS_00008401	XLOC_004009	12	+	741696	741776	2	1423	lincRNA	known
TCONS_00008401	XLOC_004009	12	+	742502	742594	3	1423	lincRNA	known
TCONS_00008401	XLOC_004009	12	+	743369	743421	4	1423	lincRNA	known
TCONS_00008401	XLOC_004009	12	+	743538	744444	5	1423	lincRNA	known
TCONS_00008402	XLOC_004009	12	+	686786	687074	1	775	lincRNA	known
TCONS_00008402	XLOC_004009	12	+	741696	741776	2	775	lincRNA	known
TCONS_00008402	XLOC_004009	12	+	742502	742594	3	775	lincRNA	known
TCONS_00008402	XLOC_004009	12	+	743369	743421	4	775	lincRNA	known
TCONS_00008402	XLOC_004009	12	+	743538	743663	5	775	lincRNA	known
TCONS_00008402	XLOC_004009	12	+	746608	746740	6	775	lincRNA	known
TCONS_00008403	XLOC_004009	12	+	686804	687074	1	654	lincRNA	known
TCONS_00008403	XLOC_004009	12	+	741696	741776	2	654	lincRNA	known
TCONS_00008403	XLOC_004009	12	+	742502	742594	3	654	lincRNA	known
TCONS_00008403	XLOC_004009	12	+	743369	743421	4	654	lincRNA	known
TCONS_00008403	XLOC_004009	12	+	743538	743663	5	654	lincRNA	known
TCONS_00008403	XLOC_004009	12	+	766758	766787	6	654	lincRNA	known
TCONS_00008404	XLOC_004009	12	+	740851	740908	1	1192	lincRNA	known
TCONS_00008404	XLOC_004009	12	+	741696	741776	2	1192	lincRNA	known
TCONS_00008404	XLOC_004009	12	+	742502	742594	3	1192	lincRNA	known
TCONS_00008404	XLOC_004009	12	+	743369	743421	4	1192	lincRNA	known
TCONS_00008404	XLOC_004009	12	+	743538	744444	5	1192	lincRNA	known
TCONS_00008611	XLOC_004089	12	+	8884406	8884439	1	1081	lincRNA	known
TCONS_00008611	XLOC_004089	12	+	8888575	8889621	2	1081	lincRNA	known
TCONS_00008614	XLOC_004091	12	+	11264218	11264324	1	1366	lincRNA	known
TCONS_00008614	XLOC_004091	12	+	11280384	11280464	2	1366	lincRNA	known
TCONS_00008614	XLOC_004091	12	+	11282416	11282516	3	1366	lincRNA	known
TCONS_00008614	XLOC_004091	12	+	11305013	11306089	4	1366	lincRNA	known
TCONS_00008615	XLOC_004091	12	+	11264218	11264324	1	304	lincRNA	novel
TCONS_00008615	XLOC_004091	12	+	11280384	11280459	2	304	lincRNA	novel
TCONS_00008615	XLOC_004091	12	+	11282416	11282500	3	304	lincRNA	novel
TCONS_00008615	XLOC_004091	12	+	11313185	11313220	4	304	lincRNA	novel
TCONS_00008616	XLOC_004091	12	+	11264222	11264324	1	318	lincRNA	novel
TCONS_00008616	XLOC_004091	12	+	11280384	11280464	2	318	lincRNA	novel
TCONS_00008616	XLOC_004091	12	+	11282416	11282516	3	318	lincRNA	novel
TCONS_00008616	XLOC_004091	12	+	11300909	11300941	4	318	lincRNA	novel
TCONS_00008617	XLOC_004091	12	+	11264231	11264324	1	1348	lincRNA	known
TCONS_00008617	XLOC_004091	12	+	11280384	11280459	2	1348	lincRNA	known
TCONS_00008617	XLOC_004091	12	+	11282416	11282516	3	1348	lincRNA	known
TCONS_00008617	XLOC_004091	12	+	11305013	11306089	4	1348	lincRNA	known
TCONS_00008671	XLOC_004113	12	+	14862868	14863418	1	1800	lincRNA	known
TCONS_00008671	XLOC_004113	12	+	14865358	14865550	2	1800	lincRNA	known
TCONS_00008671	XLOC_004113	12	+	14868398	14869453	3	1800	lincRNA	known
TCONS_00008670	XLOC_004113	12	+	14862868	14863418	1	1278	lincRNA	known
TCONS_00008670	XLOC_004113	12	+	14865358	14865550	2	1278	lincRNA	known
TCONS_00008670	XLOC_004113	12	+	14868920	14869453	3	1278	lincRNA	known
TCONS_00008673	XLOC_004113	12	+	14862885	14863418	1	1779	lincRNA	known
TCONS_00008673	XLOC_004113	12	+	14865362	14865550	2	1779	lincRNA	known
TCONS_00008673	XLOC_004113	12	+	14868398	14869453	3	1779	lincRNA	known
TCONS_00008672	XLOC_004113	12	+	14862885	14863099	1	1464	lincRNA	known
TCONS_00008672	XLOC_004113	12	+	14865358	14865550	2	1464	lincRNA	known
TCONS_00008672	XLOC_004113	12	+	14868398	14869453	3	1464	lincRNA	known
TCONS_00008723	XLOC_004130	12	+	17234338	17234531	1	379	lincRNA	known
TCONS_00008723	XLOC_004130	12	+	17236252	17236333	2	379	lincRNA	known
TCONS_00008723	XLOC_004130	12	+	17236508	17236610	3	379	lincRNA	known
TCONS_00008789	XLOC_004160	12	+	19278864	19280106	1	2227	lincRNA	novel
TCONS_00008789	XLOC_004160	12	+	19280788	19281771	2	2227	lincRNA	novel
TCONS_00009118	XLOC_004323	12	+	32282120	32282157	1	1066	lincRNA	novel
TCONS_00009118	XLOC_004323	12	+	32282231	32283258	2	1066	lincRNA	novel
TCONS_00009152	XLOC_004335	12	+	35293364	35293503	1	560	lincRNA	known
TCONS_00009152	XLOC_004335	12	+	35293707	35293805	2	560	lincRNA	known
TCONS_00009152	XLOC_004335	12	+	35294288	35294608	3	560	lincRNA	known
TCONS_00009274	XLOC_004387	12	+	40395104	40395309	1	848	lincRNA	novel
TCONS_00009274	XLOC_004387	12	+	40402096	40402737	2	848	lincRNA	novel
TCONS_00009567	XLOC_004524	12	+	54703618	54703740	1	519	lincRNA	novel
TCONS_00009567	XLOC_004524	12	+	54704042	54704437	2	519	lincRNA	novel
TCONS_00009608	XLOC_004549	12	+	55457448	55457524	1	446	lincRNA	known
TCONS_00009608	XLOC_004549	12	+	55460000	55460116	2	446	lincRNA	known
TCONS_00009608	XLOC_004549	12	+	55460718	55460969	3	446	lincRNA	known
TCONS_00009714	XLOC_004605	12	-	176900	177793	1	1804	lincRNA	known
TCONS_00009714	XLOC_004605	12	-	178256	178365	2	1804	lincRNA	known
TCONS_00009714	XLOC_004605	12	-	181018	181817	3	1804	lincRNA	known
TCONS_00009819	XLOC_004639	12	-	4700547	4700569	1	3734	lincRNA	novel
TCONS_00009819	XLOC_004639	12	-	4705828	4709538	2	3734	lincRNA	novel
TCONS_00009952	XLOC_004687	12	-	8816903	8817106	1	2126	lincRNA	novel
TCONS_00009952	XLOC_004687	12	-	8818594	8820515	2	2126	lincRNA	novel
TCONS_00010005	XLOC_004707	12	-	13827850	13828733	1	1219	lincRNA	novel
TCONS_00010005	XLOC_004707	12	-	13829005	13829339	2	1219	lincRNA	novel
TCONS_00010106	XLOC_004740	12	-	18369944	18370630	1	854	lincRNA	novel
TCONS_00010106	XLOC_004740	12	-	18374183	18374349	2	854	lincRNA	novel
TCONS_00010107	XLOC_004740	12	-	18369944	18370630	1	1013	lincRNA	novel
TCONS_00010107	XLOC_004740	12	-	18388835	18389011	2	1013	lincRNA	novel
TCONS_00010107	XLOC_004740	12	-	18391111	18391259	3	1013	lincRNA	novel
TCONS_00010182	XLOC_004765	12	-	19615881	19616011	1	487	lincRNA	novel
TCONS_00010182	XLOC_004765	12	-	19616601	19616746	2	487	lincRNA	novel
TCONS_00010182	XLOC_004765	12	-	19621723	19621932	3	487	lincRNA	novel
TCONS_00010183	XLOC_004766	12	-	19820410	19821663	1	1433	lincRNA	novel
TCONS_00010183	XLOC_004766	12	-	19828532	19828618	2	1433	lincRNA	novel
TCONS_00010183	XLOC_004766	12	-	19840121	19840212	3	1433	lincRNA	novel
TCONS_00010184	XLOC_004767	12	-	19849019	19849146	1	433	lincRNA	novel
TCONS_00010184	XLOC_004767	12	-	19856292	19856409	2	433	lincRNA	novel
TCONS_00010184	XLOC_004767	12	-	19859618	19859804	3	433	lincRNA	novel
TCONS_00010349	XLOC_004842	12	-	23984069	23984977	1	1123	lincRNA	known
TCONS_00010349	XLOC_004842	12	-	23985845	23986058	2	1123	lincRNA	known
TCONS_00010351	XLOC_004844	12	-	24005105	24007100	1	2341	lincRNA	known
TCONS_00010351	XLOC_004844	12	-	24008385	24008497	2	2341	lincRNA	known
TCONS_00010351	XLOC_004844	12	-	24010017	24010248	3	2341	lincRNA	known
TCONS_00010354	XLOC_004846	12	-	24076929	24077217	1	358	lincRNA	novel
TCONS_00010354	XLOC_004846	12	-	24078042	24078110	2	358	lincRNA	novel
TCONS_00010488	XLOC_004905	12	-	34078654	34078762	1	757	lincRNA	known
TCONS_00010488	XLOC_004905	12	-	34079069	34079716	2	757	lincRNA	known
TCONS_00010495	XLOC_004908	12	-	34582382	34582655	1	405	lincRNA	novel
TCONS_00010495	XLOC_004908	12	-	34582927	34583057	2	405	lincRNA	novel
TCONS_00010915	XLOC_005089	12	-	52366434	52367060	1	748	lincRNA	novel
TCONS_00010915	XLOC_005089	12	-	52368730	52368850	2	748	lincRNA	novel
TCONS_00010937	XLOC_005096	12	-	52709649	52709698	1	555	lincRNA	known
TCONS_00010937	XLOC_005096	12	-	52722918	52723082	2	555	lincRNA	known
TCONS_00010937	XLOC_005096	12	-	52726893	52727232	3	555	lincRNA	known
TCONS_00010955	XLOC_005103	12	-	53933807	53934928	1	1225	lincRNA	known
TCONS_00010955	XLOC_005103	12	-	53935417	53935519	2	1225	lincRNA	known
TCONS_00011117	XLOC_005171	12	-	55896290	55896917	1	1019	lincRNA	novel
TCONS_00011117	XLOC_005171	12	-	55901022	55901412	2	1019	lincRNA	novel
TCONS_00011126	XLOC_005175	12	-	56019215	56019539	1	673	lincRNA	novel
TCONS_00011126	XLOC_005175	12	-	56021811	56022158	2	673	lincRNA	novel
TCONS_00011415	XLOC_005369	13	+	11184982	11185249	1	556	lincRNA	novel
TCONS_00011415	XLOC_005369	13	+	11192506	11192544	2	556	lincRNA	novel
TCONS_00011415	XLOC_005369	13	+	11245529	11245595	3	556	lincRNA	novel
TCONS_00011415	XLOC_005369	13	+	11246592	11246773	4	556	lincRNA	novel
TCONS_00011416	XLOC_005369	13	+	11184982	11185249	1	3327	lincRNA	known
TCONS_00011416	XLOC_005369	13	+	11192506	11192544	2	3327	lincRNA	known
TCONS_00011416	XLOC_005369	13	+	11258385	11261404	3	3327	lincRNA	known
TCONS_00011417	XLOC_005369	13	+	11185019	11185249	1	692	lincRNA	known
TCONS_00011417	XLOC_005369	13	+	11192506	11192544	2	692	lincRNA	known
TCONS_00011417	XLOC_005369	13	+	11212547	11212668	3	692	lincRNA	known
TCONS_00011417	XLOC_005369	13	+	11224920	11225219	4	692	lincRNA	known
TCONS_00011438	XLOC_005379	13	+	14302567	14302985	1	861	lincRNA	novel
TCONS_00011438	XLOC_005379	13	+	14307735	14307803	2	861	lincRNA	novel
TCONS_00011438	XLOC_005379	13	+	14398819	14398976	3	861	lincRNA	novel
TCONS_00011438	XLOC_005379	13	+	14414038	14414252	4	861	lincRNA	novel
TCONS_00011450	XLOC_005386	13	+	19405159	19405367	1	917	lincRNA	novel
TCONS_00011450	XLOC_005386	13	+	19423275	19423982	2	917	lincRNA	novel
TCONS_00011471	XLOC_005397	13	+	23116831	23116936	1	326	lincRNA	known
TCONS_00011471	XLOC_005397	13	+	23118836	23119011	2	326	lincRNA	known
TCONS_00011471	XLOC_005397	13	+	23158891	23158934	3	326	lincRNA	known
TCONS_00011559	XLOC_005437	13	+	28512022	28512135	1	865	lincRNA	novel
TCONS_00011559	XLOC_005437	13	+	28513369	28514119	2	865	lincRNA	novel
TCONS_00011560	XLOC_005438	13	+	28517555	28517763	1	1159	lincRNA	novel
TCONS_00011560	XLOC_005438	13	+	28518086	28519035	2	1159	lincRNA	novel
TCONS_00011714	XLOC_005490	13	+	34300103	34300632	1	769	lincRNA	known
TCONS_00011714	XLOC_005490	13	+	34302028	34302131	2	769	lincRNA	known
TCONS_00011714	XLOC_005490	13	+	34309392	34309459	3	769	lincRNA	known
TCONS_00011714	XLOC_005490	13	+	34333379	34333445	4	769	lincRNA	known
TCONS_00011734	XLOC_005502	13	+	35291440	35292023	1	669	lincRNA	known
TCONS_00011734	XLOC_005502	13	+	35296928	35297012	2	669	lincRNA	known
TCONS_00011911	XLOC_005575	13	+	45609561	45609658	1	363	lincRNA	novel
TCONS_00011911	XLOC_005575	13	+	45630511	45630775	2	363	lincRNA	novel
TCONS_00012192	XLOC_005697	13	+	82935423	82935459	1	209	lincRNA	known
TCONS_00012192	XLOC_005697	13	+	82938379	82938550	2	209	lincRNA	known
TCONS_00012307	XLOC_005749	13	+	98764122	98764411	1	2384	lincRNA	novel
TCONS_00012307	XLOC_005749	13	+	98765170	98767263	2	2384	lincRNA	novel
TCONS_00012329	XLOC_005759	13	+	101092614	101092764	1	1081	lincRNA	known
TCONS_00012329	XLOC_005759	13	+	101093104	101093162	2	1081	lincRNA	known
TCONS_00012329	XLOC_005759	13	+	101093754	101094624	3	1081	lincRNA	known
TCONS_00012328	XLOC_005759	13	+	101092614	101092764	1	1273	lincRNA	known
TCONS_00012328	XLOC_005759	13	+	101093104	101093354	2	1273	lincRNA	known
TCONS_00012328	XLOC_005759	13	+	101093754	101094624	3	1273	lincRNA	known
TCONS_00012330	XLOC_005759	13	+	101092667	101092764	1	1051	lincRNA	novel
TCONS_00012330	XLOC_005759	13	+	101093104	101093354	2	1051	lincRNA	novel
TCONS_00012330	XLOC_005759	13	+	101093754	101094092	3	1051	lincRNA	novel
TCONS_00012330	XLOC_005759	13	+	101116126	101116488	4	1051	lincRNA	novel
TCONS_00012406	XLOC_005799	13	+	117524282	117526271	1	2289	lincRNA	novel
TCONS_00012406	XLOC_005799	13	+	117528066	117528364	2	2289	lincRNA	novel
TCONS_00012418	XLOC_005805	13	+	119038359	119038639	1	602	lincRNA	novel
TCONS_00012418	XLOC_005805	13	+	119039745	119039843	2	602	lincRNA	novel
TCONS_00012418	XLOC_005805	13	+	119040435	119040527	3	602	lincRNA	novel
TCONS_00012418	XLOC_005805	13	+	119044943	119045071	4	602	lincRNA	novel
TCONS_00012424	XLOC_005810	13	+	120292083	120292104	1	808	lincRNA	novel
TCONS_00012424	XLOC_005810	13	+	120292208	120292993	2	808	lincRNA	novel
TCONS_00012532	XLOC_005861	13	+	131689864	131690080	1	1008	lincRNA	novel
TCONS_00012532	XLOC_005861	13	+	131690328	131691118	2	1008	lincRNA	novel
TCONS_00012592	XLOC_005887	13	+	134685249	134685347	1	466	lincRNA	novel
TCONS_00012592	XLOC_005887	13	+	134685499	134685633	2	466	lincRNA	novel
TCONS_00012592	XLOC_005887	13	+	134697788	134697903	3	466	lincRNA	novel
TCONS_00012592	XLOC_005887	13	+	134701913	134701992	4	466	lincRNA	novel
TCONS_00012592	XLOC_005887	13	+	134702264	134702299	5	466	lincRNA	novel
TCONS_00012593	XLOC_005887	13	+	134685462	134685633	1	1359	lincRNA	novel
TCONS_00012593	XLOC_005887	13	+	134697788	134697903	2	1359	lincRNA	novel
TCONS_00012593	XLOC_005887	13	+	134701913	134701992	3	1359	lincRNA	novel
TCONS_00012593	XLOC_005887	13	+	134706426	134706540	4	1359	lincRNA	novel
TCONS_00012593	XLOC_005887	13	+	134709174	134710049	5	1359	lincRNA	novel
TCONS_00012812	XLOC_005963	13	+	154340588	154340669	1	1260	lincRNA	known
TCONS_00012812	XLOC_005963	13	+	154342646	154343823	2	1260	lincRNA	known
TCONS_00012813	XLOC_005963	13	+	154340623	154340669	1	348	lincRNA	known
TCONS_00012813	XLOC_005963	13	+	154342646	154342740	2	348	lincRNA	known
TCONS_00012813	XLOC_005963	13	+	154567698	154567749	3	348	lincRNA	known
TCONS_00012813	XLOC_005963	13	+	154715370	154715443	4	348	lincRNA	known
TCONS_00012813	XLOC_005963	13	+	154766052	154766131	5	348	lincRNA	known
TCONS_00013076	XLOC_006072	13	+	207272049	207272575	1	2996	lincRNA	known
TCONS_00013076	XLOC_006072	13	+	207272769	207272937	2	2996	lincRNA	known
TCONS_00013076	XLOC_006072	13	+	207281651	207283950	3	2996	lincRNA	known
TCONS_00013082	XLOC_006075	13	+	207620859	207620946	1	2520	lincRNA	novel
TCONS_00013082	XLOC_006075	13	+	207622872	207625303	2	2520	lincRNA	novel
TCONS_00013243	XLOC_006152	13	-	11257527	11258565	1	2575	lincRNA	known
TCONS_00013243	XLOC_006152	13	-	11263225	11264760	2	2575	lincRNA	known
TCONS_00013314	XLOC_006180	13	-	20829838	20831438	1	2649	lincRNA	novel
TCONS_00013314	XLOC_006180	13	-	20831708	20832755	2	2649	lincRNA	novel
TCONS_00013830	XLOC_006369	13	-	43338924	43338982	1	1480	lincRNA	known
TCONS_00013830	XLOC_006369	13	-	43339458	43340878	2	1480	lincRNA	known
TCONS_00014053	XLOC_006460	13	-	75894373	75894492	1	523	lincRNA	novel
TCONS_00014053	XLOC_006460	13	-	75927060	75927462	2	523	lincRNA	novel
TCONS_00014205	XLOC_006526	13	-	86560874	86561137	1	1180	lincRNA	novel
TCONS_00014205	XLOC_006526	13	-	86561781	86562696	2	1180	lincRNA	novel
TCONS_00014239	XLOC_006539	13	-	90686437	90686475	1	376	lincRNA	known
TCONS_00014239	XLOC_006539	13	-	90695133	90695250	2	376	lincRNA	known
TCONS_00014239	XLOC_006539	13	-	90739533	90739751	3	376	lincRNA	known
TCONS_00014318	XLOC_006568	13	-	98299044	98299190	1	744	lincRNA	known
TCONS_00014318	XLOC_006568	13	-	98415013	98415113	2	744	lincRNA	known
TCONS_00014318	XLOC_006568	13	-	98416158	98416234	3	744	lincRNA	known
TCONS_00014318	XLOC_006568	13	-	98418056	98418173	4	744	lincRNA	known
TCONS_00014318	XLOC_006568	13	-	98423914	98424214	5	744	lincRNA	known
TCONS_00014476	XLOC_006644	13	-	125005560	125005901	1	1872	lincRNA	novel
TCONS_00014476	XLOC_006644	13	-	125023512	125025041	2	1872	lincRNA	novel
TCONS_00014480	XLOC_006647	13	-	126226531	126226752	1	529	lincRNA	known
TCONS_00014480	XLOC_006647	13	-	126228538	126228666	2	529	lincRNA	known
TCONS_00014480	XLOC_006647	13	-	126263707	126263884	3	529	lincRNA	known
TCONS_00014479	XLOC_006647	13	-	126226531	126226752	1	400	lincRNA	known
TCONS_00014479	XLOC_006647	13	-	126263707	126263884	2	400	lincRNA	known
TCONS_00014498	XLOC_006659	13	-	130157267	130158196	1	1148	lincRNA	novel
TCONS_00014498	XLOC_006659	13	-	130161642	130161859	2	1148	lincRNA	novel
TCONS_00014509	XLOC_006665	13	-	130985854	130986555	1	980	lincRNA	known
TCONS_00014509	XLOC_006665	13	-	130995778	130995860	2	980	lincRNA	known
TCONS_00014509	XLOC_006665	13	-	130996017	130996211	3	980	lincRNA	known
TCONS_00014510	XLOC_006665	13	-	130985854	130986555	1	887	lincRNA	known
TCONS_00014510	XLOC_006665	13	-	130995778	130995860	2	887	lincRNA	known
TCONS_00014510	XLOC_006665	13	-	130996565	130996666	3	887	lincRNA	known
TCONS_00014511	XLOC_006665	13	-	130985854	130986555	1	1045	lincRNA	known
TCONS_00014511	XLOC_006665	13	-	130995462	130995608	2	1045	lincRNA	known
TCONS_00014511	XLOC_006665	13	-	130995778	130995860	3	1045	lincRNA	known
TCONS_00014511	XLOC_006665	13	-	130996565	130996677	4	1045	lincRNA	known
TCONS_00014583	XLOC_006697	13	-	136078262	136078382	1	553	lincRNA	novel
TCONS_00014583	XLOC_006697	13	-	136089394	136089474	2	553	lincRNA	novel
TCONS_00014583	XLOC_006697	13	-	136097084	136097173	3	553	lincRNA	novel
TCONS_00014583	XLOC_006697	13	-	136106996	136107122	4	553	lincRNA	novel
TCONS_00014583	XLOC_006697	13	-	136135677	136135810	5	553	lincRNA	novel
TCONS_00014584	XLOC_006697	13	-	136078262	136078382	1	770	lincRNA	novel
TCONS_00014584	XLOC_006697	13	-	136089394	136089474	2	770	lincRNA	novel
TCONS_00014584	XLOC_006697	13	-	136096476	136096589	3	770	lincRNA	novel
TCONS_00014584	XLOC_006697	13	-	136097084	136097173	4	770	lincRNA	novel
TCONS_00014584	XLOC_006697	13	-	136106996	136107122	5	770	lincRNA	novel
TCONS_00014584	XLOC_006697	13	-	136135677	136135913	6	770	lincRNA	novel
TCONS_00014586	XLOC_006697	13	-	136088114	136088636	1	1172	lincRNA	novel
TCONS_00014586	XLOC_006697	13	-	136089394	136089474	2	1172	lincRNA	novel
TCONS_00014586	XLOC_006697	13	-	136096476	136096589	3	1172	lincRNA	novel
TCONS_00014586	XLOC_006697	13	-	136097084	136097173	4	1172	lincRNA	novel
TCONS_00014586	XLOC_006697	13	-	136106996	136107122	5	1172	lincRNA	novel
TCONS_00014586	XLOC_006697	13	-	136135677	136135913	6	1172	lincRNA	novel
TCONS_00014585	XLOC_006697	13	-	136088114	136088636	1	1376	lincRNA	novel
TCONS_00014585	XLOC_006697	13	-	136089394	136089474	2	1376	lincRNA	novel
TCONS_00014585	XLOC_006697	13	-	136095608	136095811	3	1376	lincRNA	novel
TCONS_00014585	XLOC_006697	13	-	136096476	136096589	4	1376	lincRNA	novel
TCONS_00014585	XLOC_006697	13	-	136097084	136097173	5	1376	lincRNA	novel
TCONS_00014585	XLOC_006697	13	-	136106996	136107122	6	1376	lincRNA	novel
TCONS_00014585	XLOC_006697	13	-	136135677	136135913	7	1376	lincRNA	novel
TCONS_00014601	XLOC_006707	13	-	140627174	140627628	1	764	lincRNA	known
TCONS_00014601	XLOC_006707	13	-	140628223	140628288	2	764	lincRNA	known
TCONS_00014601	XLOC_006707	13	-	140628370	140628440	3	764	lincRNA	known
TCONS_00014601	XLOC_006707	13	-	140630472	140630611	4	764	lincRNA	known
TCONS_00014601	XLOC_006707	13	-	140632003	140632034	5	764	lincRNA	known
TCONS_00014603	XLOC_006707	13	-	140627174	140627699	1	853	lincRNA	known
TCONS_00014603	XLOC_006707	13	-	140628223	140628299	2	853	lincRNA	known
TCONS_00014603	XLOC_006707	13	-	140628370	140628440	3	853	lincRNA	known
TCONS_00014603	XLOC_006707	13	-	140630472	140630611	4	853	lincRNA	known
TCONS_00014603	XLOC_006707	13	-	140632003	140632041	5	853	lincRNA	known
TCONS_00014602	XLOC_006707	13	-	140627174	140627699	1	842	lincRNA	known
TCONS_00014602	XLOC_006707	13	-	140628223	140628288	2	842	lincRNA	known
TCONS_00014602	XLOC_006707	13	-	140628370	140628440	3	842	lincRNA	known
TCONS_00014602	XLOC_006707	13	-	140630472	140630611	4	842	lincRNA	known
TCONS_00014602	XLOC_006707	13	-	140632003	140632041	5	842	lincRNA	known
TCONS_00014608	XLOC_006707	13	-	140629328	140629400	1	531	lincRNA	known
TCONS_00014608	XLOC_006707	13	-	140629567	140629665	2	531	lincRNA	known
TCONS_00014608	XLOC_006707	13	-	140630472	140630611	3	531	lincRNA	known
TCONS_00014608	XLOC_006707	13	-	140632003	140632221	4	531	lincRNA	known
TCONS_00014787	XLOC_006774	13	-	154253545	154253690	1	666	lincRNA	known
TCONS_00014787	XLOC_006774	13	-	154335517	154335847	2	666	lincRNA	known
TCONS_00014787	XLOC_006774	13	-	154339910	154340098	3	666	lincRNA	known
TCONS_00014789	XLOC_006774	13	-	154323621	154323655	1	539	lincRNA	known
TCONS_00014789	XLOC_006774	13	-	154325319	154325365	2	539	lincRNA	known
TCONS_00014789	XLOC_006774	13	-	154335517	154335644	3	539	lincRNA	known
TCONS_00014789	XLOC_006774	13	-	154335739	154335847	4	539	lincRNA	known
TCONS_00014789	XLOC_006774	13	-	154339910	154340129	5	539	lincRNA	known
TCONS_00014790	XLOC_006774	13	-	154327611	154327681	1	517	lincRNA	known
TCONS_00014790	XLOC_006774	13	-	154335517	154335644	2	517	lincRNA	known
TCONS_00014790	XLOC_006774	13	-	154335739	154335847	3	517	lincRNA	known
TCONS_00014790	XLOC_006774	13	-	154339910	154340118	4	517	lincRNA	known
TCONS_00014906	XLOC_006838	13	-	170385985	170386135	1	353	lincRNA	known
TCONS_00014906	XLOC_006838	13	-	170392074	170392219	2	353	lincRNA	known
TCONS_00014906	XLOC_006838	13	-	170392336	170392391	3	353	lincRNA	known
TCONS_00014972	XLOC_006875	13	-	190447418	190449107	1	3130	lincRNA	novel
TCONS_00014972	XLOC_006875	13	-	190456510	190456671	2	3130	lincRNA	novel
TCONS_00014972	XLOC_006875	13	-	190457465	190457495	3	3130	lincRNA	novel
TCONS_00014972	XLOC_006875	13	-	190470489	190470624	4	3130	lincRNA	novel
TCONS_00014972	XLOC_006875	13	-	190477162	190478168	5	3130	lincRNA	novel
TCONS_00014972	XLOC_006875	13	-	190479289	190479392	6	3130	lincRNA	novel
TCONS_00014973	XLOC_006875	13	-	190447418	190449107	1	3170	lincRNA	novel
TCONS_00014973	XLOC_006875	13	-	190456510	190456671	2	3170	lincRNA	novel
TCONS_00014973	XLOC_006875	13	-	190457465	190457495	3	3170	lincRNA	novel
TCONS_00014973	XLOC_006875	13	-	190470484	190470624	4	3170	lincRNA	novel
TCONS_00014973	XLOC_006875	13	-	190477162	190478168	5	3170	lincRNA	novel
TCONS_00014973	XLOC_006875	13	-	190479289	190479427	6	3170	lincRNA	novel
TCONS_00014974	XLOC_006875	13	-	190474395	190478168	1	3913	lincRNA	known
TCONS_00014974	XLOC_006875	13	-	190479289	190479427	2	3913	lincRNA	known
TCONS_00015172	XLOC_006966	13	-	216542270	216542621	1	4077	lincRNA	known
TCONS_00015172	XLOC_006966	13	-	216543462	216544578	2	4077	lincRNA	known
TCONS_00015172	XLOC_006966	13	-	216544719	216547326	3	4077	lincRNA	known
TCONS_00015173	XLOC_006966	13	-	216543122	216543881	1	3366	lincRNA	novel
TCONS_00015173	XLOC_006966	13	-	216544719	216547324	2	3366	lincRNA	novel
TCONS_00015507	XLOC_007256	14	+	1625692	1626203	1	842	lincRNA	novel
TCONS_00015507	XLOC_007256	14	+	1630804	1631133	2	842	lincRNA	novel
TCONS_00015606	XLOC_007294	14	+	10769515	10769676	1	370	lincRNA	novel
TCONS_00015606	XLOC_007294	14	+	10872963	10873121	2	370	lincRNA	novel
TCONS_00015606	XLOC_007294	14	+	10896521	10896569	3	370	lincRNA	novel
TCONS_00015776	XLOC_007362	14	+	30759526	30760420	1	1146	lincRNA	known
TCONS_00015776	XLOC_007362	14	+	30761596	30761732	2	1146	lincRNA	known
TCONS_00015776	XLOC_007362	14	+	30765223	30765336	3	1146	lincRNA	known
TCONS_00016076	XLOC_007479	14	+	45936742	45937133	1	3517	lincRNA	known
TCONS_00016076	XLOC_007479	14	+	45937381	45937529	2	3517	lincRNA	known
TCONS_00016076	XLOC_007479	14	+	45941975	45944950	3	3517	lincRNA	known
TCONS_00016382	XLOC_007606	14	+	60346341	60346484	1	1827	lincRNA	novel
TCONS_00016382	XLOC_007606	14	+	60352223	60352474	2	1827	lincRNA	novel
TCONS_00016382	XLOC_007606	14	+	60354336	60355766	3	1827	lincRNA	novel
TCONS_00016385	XLOC_007606	14	+	60346347	60346484	1	2157	lincRNA	known
TCONS_00016385	XLOC_007606	14	+	60371629	60373647	2	2157	lincRNA	known
TCONS_00016387	XLOC_007608	14	+	60658175	60658400	1	715	lincRNA	novel
TCONS_00016387	XLOC_007608	14	+	60660934	60661422	2	715	lincRNA	novel
TCONS_00016624	XLOC_007697	14	+	87969114	87969490	1	3580	lincRNA	known
TCONS_00016624	XLOC_007697	14	+	87970393	87973595	2	3580	lincRNA	known
TCONS_00016625	XLOC_007697	14	+	87969160	87969490	1	3289	lincRNA	known
TCONS_00016625	XLOC_007697	14	+	87970638	87973595	2	3289	lincRNA	known
TCONS_00016783	XLOC_007760	14	+	107323552	107323712	1	788	lincRNA	known
TCONS_00016783	XLOC_007760	14	+	107335737	107335897	2	788	lincRNA	known
TCONS_00016783	XLOC_007760	14	+	107339344	107339809	3	788	lincRNA	known
TCONS_00017127	XLOC_007895	14	+	135641924	135642163	1	417	lincRNA	known
TCONS_00017127	XLOC_007895	14	+	135643069	135643245	2	417	lincRNA	known
TCONS_00017159	XLOC_007911	14	+	140265728	140265837	1	1399	lincRNA	known
TCONS_00017159	XLOC_007911	14	+	140303991	140305279	2	1399	lincRNA	known
TCONS_00017293	XLOC_007949	14	+	146059250	146059678	1	505	lincRNA	novel
TCONS_00017293	XLOC_007949	14	+	146061076	146061151	2	505	lincRNA	novel
TCONS_00017757	XLOC_008132	14	-	35173110	35175334	1	3314	lincRNA	known
TCONS_00017757	XLOC_008132	14	-	35176593	35177681	2	3314	lincRNA	known
TCONS_00017903	XLOC_008197	14	-	47744207	47745694	1	1614	lincRNA	novel
TCONS_00017903	XLOC_008197	14	-	47749051	47749176	2	1614	lincRNA	novel
TCONS_00018227	XLOC_008318	14	-	64959002	64959481	1	1118	lincRNA	known
TCONS_00018227	XLOC_008318	14	-	64973381	64973562	2	1118	lincRNA	known
TCONS_00018227	XLOC_008318	14	-	64974550	64974667	3	1118	lincRNA	known
TCONS_00018227	XLOC_008318	14	-	64992349	64992686	4	1118	lincRNA	known
TCONS_00018228	XLOC_008318	14	-	64971367	64971532	1	825	lincRNA	known
TCONS_00018228	XLOC_008318	14	-	64973381	64973562	2	825	lincRNA	known
TCONS_00018228	XLOC_008318	14	-	64974514	64974667	3	825	lincRNA	known
TCONS_00018228	XLOC_008318	14	-	64992349	64992671	4	825	lincRNA	known
TCONS_00018645	XLOC_008486	14	-	111746593	111747991	1	1577	lincRNA	known
TCONS_00018645	XLOC_008486	14	-	111763914	111764034	2	1577	lincRNA	known
TCONS_00018645	XLOC_008486	14	-	111783969	111784025	3	1577	lincRNA	known
TCONS_00018796	XLOC_008544	14	-	121731695	121735026	1	3636	lincRNA	novel
TCONS_00018796	XLOC_008544	14	-	121735948	121736251	2	3636	lincRNA	novel
TCONS_00018935	XLOC_008589	14	-	136349613	136350083	1	887	lincRNA	novel
TCONS_00018935	XLOC_008589	14	-	136382141	136382246	2	887	lincRNA	novel
TCONS_00018935	XLOC_008589	14	-	136384067	136384376	3	887	lincRNA	novel
TCONS_00019104	XLOC_008652	14	-	150586848	150586957	1	4678	lincRNA	known
TCONS_00019104	XLOC_008652	14	-	150587621	150587741	2	4678	lincRNA	known
TCONS_00019104	XLOC_008652	14	-	150602353	150606269	3	4678	lincRNA	known
TCONS_00019104	XLOC_008652	14	-	150606401	150606930	4	4678	lincRNA	known
TCONS_00019105	XLOC_008652	14	-	150597646	150597803	1	866	lincRNA	novel
TCONS_00019105	XLOC_008652	14	-	150606073	150606269	2	866	lincRNA	novel
TCONS_00019105	XLOC_008652	14	-	150606401	150606911	3	866	lincRNA	novel
TCONS_00019106	XLOC_008652	14	-	150601308	150606269	1	5492	lincRNA	novel
TCONS_00019106	XLOC_008652	14	-	150606401	150606930	2	5492	lincRNA	novel
TCONS_00019698	XLOC_008973	15	+	74346744	74348503	1	1946	lincRNA	known
TCONS_00019698	XLOC_008973	15	+	74353913	74354098	2	1946	lincRNA	known
TCONS_00019857	XLOC_009033	15	+	91005125	91005553	1	4754	lincRNA	novel
TCONS_00019857	XLOC_009033	15	+	91005874	91010198	2	4754	lincRNA	novel
TCONS_00019916	XLOC_009055	15	+	95179394	95179588	1	635	lincRNA	known
TCONS_00019916	XLOC_009055	15	+	95179736	95179811	2	635	lincRNA	known
TCONS_00019916	XLOC_009055	15	+	95284091	95284454	3	635	lincRNA	known
TCONS_00020075	XLOC_009117	15	+	115371412	115371565	1	1485	lincRNA	novel
TCONS_00020075	XLOC_009117	15	+	115381211	115382541	2	1485	lincRNA	novel
TCONS_00020175	XLOC_009155	15	+	121112461	121112490	1	1346	lincRNA	novel
TCONS_00020175	XLOC_009155	15	+	121114862	121116177	2	1346	lincRNA	novel
TCONS_00020222	XLOC_009175	15	+	124804825	124805352	1	911	lincRNA	known
TCONS_00020222	XLOC_009175	15	+	124807958	124808340	2	911	lincRNA	known
TCONS_00020275	XLOC_009207	15	+	133966371	133966442	1	600	lincRNA	known
TCONS_00020275	XLOC_009207	15	+	133967797	133968324	2	600	lincRNA	known
TCONS_00020462	XLOC_009289	15	+	151296709	151297264	1	4270	lincRNA	novel
TCONS_00020462	XLOC_009289	15	+	151297445	151301158	2	4270	lincRNA	novel
TCONS_00020463	XLOC_009289	15	+	151296709	151297264	1	1981	lincRNA	novel
TCONS_00020463	XLOC_009289	15	+	151297445	151298651	2	1981	lincRNA	novel
TCONS_00020463	XLOC_009289	15	+	151303209	151303426	3	1981	lincRNA	novel
TCONS_00020587	XLOC_009355	15	-	8167427	8167519	1	356	lincRNA	known
TCONS_00020587	XLOC_009355	15	-	8167859	8167958	2	356	lincRNA	known
TCONS_00020587	XLOC_009355	15	-	8169168	8169231	3	356	lincRNA	known
TCONS_00020587	XLOC_009355	15	-	8187530	8187628	4	356	lincRNA	known
TCONS_00020649	XLOC_009385	15	-	28756886	28757188	1	616	lincRNA	novel
TCONS_00020649	XLOC_009385	15	-	28765395	28765504	2	616	lincRNA	novel
TCONS_00020649	XLOC_009385	15	-	28765964	28766166	3	616	lincRNA	novel
TCONS_00020650	XLOC_009385	15	-	28763946	28765504	1	1761	lincRNA	known
TCONS_00020650	XLOC_009385	15	-	28765965	28766166	2	1761	lincRNA	known
TCONS_00020670	XLOC_009398	15	-	36230283	36231121	1	906	lincRNA	known
TCONS_00020670	XLOC_009398	15	-	36233445	36233511	2	906	lincRNA	known
TCONS_00020692	XLOC_009409	15	-	43205836	43205962	1	552	lincRNA	known
TCONS_00020692	XLOC_009409	15	-	43206161	43206321	2	552	lincRNA	known
TCONS_00020692	XLOC_009409	15	-	43207196	43207269	3	552	lincRNA	known
TCONS_00020692	XLOC_009409	15	-	43208724	43208913	4	552	lincRNA	known
TCONS_00020715	XLOC_009423	15	-	51511867	51514366	1	2697	lincRNA	known
TCONS_00020715	XLOC_009423	15	-	51521890	51522058	2	2697	lincRNA	known
TCONS_00020715	XLOC_009423	15	-	51530446	51530473	3	2697	lincRNA	known
TCONS_00020718	XLOC_009424	15	-	51560050	51562687	1	3064	lincRNA	known
TCONS_00020718	XLOC_009424	15	-	51569942	51570367	2	3064	lincRNA	known
TCONS_00021206	XLOC_009621	15	-	107623316	107623339	1	348	lincRNA	novel
TCONS_00021206	XLOC_009621	15	-	107656659	107656755	2	348	lincRNA	novel
TCONS_00021206	XLOC_009621	15	-	107657962	107658188	3	348	lincRNA	novel
TCONS_00021207	XLOC_009621	15	-	107625505	107625720	1	574	lincRNA	known
TCONS_00021207	XLOC_009621	15	-	107656659	107656755	2	574	lincRNA	known
TCONS_00021207	XLOC_009621	15	-	107657962	107658222	3	574	lincRNA	known
TCONS_00021317	XLOC_009656	15	-	117343240	117344757	1	1665	lincRNA	known
TCONS_00021317	XLOC_009656	15	-	117349996	117350072	2	1665	lincRNA	known
TCONS_00021317	XLOC_009656	15	-	117350916	117350985	3	1665	lincRNA	known
TCONS_00021318	XLOC_009656	15	-	117343240	117344750	1	1671	lincRNA	known
TCONS_00021318	XLOC_009656	15	-	117349996	117350084	2	1671	lincRNA	known
TCONS_00021318	XLOC_009656	15	-	117350916	117350986	3	1671	lincRNA	known
TCONS_00021319	XLOC_009656	15	-	117343240	117344757	1	1688	lincRNA	known
TCONS_00021319	XLOC_009656	15	-	117349996	117350084	2	1688	lincRNA	known
TCONS_00021319	XLOC_009656	15	-	117350916	117350996	3	1688	lincRNA	known
TCONS_00021480	XLOC_009713	15	-	133852498	133853709	1	2074	lincRNA	novel
TCONS_00021480	XLOC_009713	15	-	133854123	133854984	2	2074	lincRNA	novel
TCONS_00021576	XLOC_009763	15	-	145139304	145139476	1	586	lincRNA	novel
TCONS_00021576	XLOC_009763	15	-	145141081	145141493	2	586	lincRNA	novel
TCONS_00021915	XLOC_010023	16	+	7176779	7177201	1	5022	lincRNA	novel
TCONS_00021915	XLOC_010023	16	+	7179530	7184128	2	5022	lincRNA	novel
TCONS_00022050	XLOC_010082	16	+	36217113	36217298	1	660	lincRNA	known
TCONS_00022050	XLOC_010082	16	+	36218639	36218699	2	660	lincRNA	known
TCONS_00022050	XLOC_010082	16	+	36245508	36245920	3	660	lincRNA	known
TCONS_00022188	XLOC_010138	16	+	52742124	52742346	1	643	lincRNA	novel
TCONS_00022188	XLOC_010138	16	+	52742590	52742874	2	643	lincRNA	novel
TCONS_00022188	XLOC_010138	16	+	52745253	52745351	3	643	lincRNA	novel
TCONS_00022188	XLOC_010138	16	+	52745707	52745742	4	643	lincRNA	novel
TCONS_00022189	XLOC_010138	16	+	52742124	52742346	1	3529	lincRNA	known
TCONS_00022189	XLOC_010138	16	+	52742590	52742874	2	3529	lincRNA	known
TCONS_00022189	XLOC_010138	16	+	52745253	52745351	3	3529	lincRNA	known
TCONS_00022189	XLOC_010138	16	+	52746272	52749193	4	3529	lincRNA	known
TCONS_00022190	XLOC_010138	16	+	52742124	52742346	1	919	lincRNA	novel
TCONS_00022190	XLOC_010138	16	+	52742590	52742874	2	919	lincRNA	novel
TCONS_00022190	XLOC_010138	16	+	52745253	52745351	3	919	lincRNA	novel
TCONS_00022190	XLOC_010138	16	+	52751155	52751466	4	919	lincRNA	novel
TCONS_00022191	XLOC_010139	16	+	52931559	52931695	1	259	lincRNA	known
TCONS_00022191	XLOC_010139	16	+	52932991	52933112	2	259	lincRNA	known
TCONS_00022201	XLOC_010144	16	+	54996898	54997104	1	516	lincRNA	novel
TCONS_00022201	XLOC_010144	16	+	54997510	54997665	2	516	lincRNA	novel
TCONS_00022201	XLOC_010144	16	+	54997765	54997917	3	516	lincRNA	novel
TCONS_00022275	XLOC_010186	16	+	70057530	70057886	1	391	lincRNA	novel
TCONS_00022275	XLOC_010186	16	+	70059598	70059631	2	391	lincRNA	novel
TCONS_00022381	XLOC_010247	16	-	4393831	4394088	1	725	lincRNA	known
TCONS_00022381	XLOC_010247	16	-	4394205	4394312	2	725	lincRNA	known
TCONS_00022381	XLOC_010247	16	-	4394959	4395064	3	725	lincRNA	known
TCONS_00022381	XLOC_010247	16	-	4402203	4402455	4	725	lincRNA	known
TCONS_00022683	XLOC_010372	16	-	50976156	50976458	1	427	lincRNA	novel
TCONS_00022683	XLOC_010372	16	-	50994564	50994687	2	427	lincRNA	novel
TCONS_00022717	XLOC_010390	16	-	54899601	54901425	1	2266	lincRNA	novel
TCONS_00022717	XLOC_010390	16	-	54910520	54910960	2	2266	lincRNA	novel
TCONS_00022718	XLOC_010390	16	-	54899601	54901425	1	1995	lincRNA	known
TCONS_00022718	XLOC_010390	16	-	54910520	54910660	2	1995	lincRNA	known
TCONS_00022718	XLOC_010390	16	-	54912753	54912781	3	1995	lincRNA	known
TCONS_00022719	XLOC_010390	16	-	54899601	54901425	1	2421	lincRNA	known
TCONS_00022719	XLOC_010390	16	-	54910520	54910660	2	2421	lincRNA	known
TCONS_00022719	XLOC_010390	16	-	54919113	54919231	3	2421	lincRNA	known
TCONS_00022719	XLOC_010390	16	-	54933026	54933270	4	2421	lincRNA	known
TCONS_00022719	XLOC_010390	16	-	54958182	54958272	5	2421	lincRNA	known
TCONS_00022900	XLOC_010477	16	-	81096845	81098212	1	1410	lincRNA	novel
TCONS_00022900	XLOC_010477	16	-	81100921	81100962	2	1410	lincRNA	novel
TCONS_00022901	XLOC_010477	16	-	81096845	81098347	1	1566	lincRNA	known
TCONS_00022901	XLOC_010477	16	-	81100921	81100983	2	1566	lincRNA	known
TCONS_00022902	XLOC_010477	16	-	81096845	81098209	1	1457	lincRNA	novel
TCONS_00022902	XLOC_010477	16	-	81100921	81101012	2	1457	lincRNA	novel
TCONS_00022903	XLOC_010477	16	-	81096845	81098209	1	1478	lincRNA	novel
TCONS_00022903	XLOC_010477	16	-	81100908	81101020	2	1478	lincRNA	novel
TCONS_00022925	XLOC_010492	16	-	86650348	86650563	1	467	lincRNA	known
TCONS_00022925	XLOC_010492	16	-	86667344	86667594	2	467	lincRNA	known
TCONS_00023057	XLOC_010586	17	+	12830814	12830864	1	1633	lincRNA	known
TCONS_00023057	XLOC_010586	17	+	12833497	12835078	2	1633	lincRNA	known
TCONS_00023106	XLOC_010603	17	+	16315821	16315929	1	683	lincRNA	known
TCONS_00023106	XLOC_010603	17	+	16352728	16353301	2	683	lincRNA	known
TCONS_00023291	XLOC_010694	17	+	37451401	37451733	1	968	lincRNA	novel
TCONS_00023291	XLOC_010694	17	+	37452144	37452207	2	968	lincRNA	novel
TCONS_00023291	XLOC_010694	17	+	37453662	37454232	3	968	lincRNA	novel
TCONS_00023349	XLOC_010731	17	+	41263772	41263983	1	793	lincRNA	known
TCONS_00023349	XLOC_010731	17	+	41269503	41270083	2	793	lincRNA	known
TCONS_00023467	XLOC_010776	17	+	44943170	44943241	1	961	lincRNA	novel
TCONS_00023467	XLOC_010776	17	+	44972573	44973461	2	961	lincRNA	novel
TCONS_00023523	XLOC_010799	17	+	47119464	47119582	1	373	lincRNA	known
TCONS_00023523	XLOC_010799	17	+	47120393	47120519	2	373	lincRNA	known
TCONS_00023523	XLOC_010799	17	+	47122166	47122292	3	373	lincRNA	known
TCONS_00023570	XLOC_010818	17	+	52134565	52135079	1	1578	lincRNA	novel
TCONS_00023570	XLOC_010818	17	+	52135193	52136255	2	1578	lincRNA	novel
TCONS_00023847	XLOC_010924	17	+	69287230	69287252	1	1302	lincRNA	novel
TCONS_00023847	XLOC_010924	17	+	69287870	69288052	2	1302	lincRNA	novel
TCONS_00023847	XLOC_010924	17	+	69290702	69290757	3	1302	lincRNA	novel
TCONS_00023847	XLOC_010924	17	+	69293036	69294075	4	1302	lincRNA	novel
TCONS_00023850	XLOC_010924	17	+	69288831	69288941	1	1207	lincRNA	novel
TCONS_00023850	XLOC_010924	17	+	69290702	69290757	2	1207	lincRNA	novel
TCONS_00023850	XLOC_010924	17	+	69293036	69294075	3	1207	lincRNA	novel
TCONS_00024038	XLOC_011015	17	-	30248530	30248855	1	453	lincRNA	novel
TCONS_00024038	XLOC_011015	17	-	30249396	30249522	2	453	lincRNA	novel
TCONS_00024331	XLOC_011152	17	-	46027707	46027968	1	3581	lincRNA	known
TCONS_00024331	XLOC_011152	17	-	46034756	46038074	2	3581	lincRNA	known
TCONS_00024351	XLOC_011162	17	-	47933632	47934980	1	1758	lincRNA	known
TCONS_00024351	XLOC_011162	17	-	47935427	47935835	2	1758	lincRNA	known
TCONS_00024371	XLOC_011173	17	-	51431542	51431841	1	804	lincRNA	novel
TCONS_00024371	XLOC_011173	17	-	51437349	51437419	2	804	lincRNA	novel
TCONS_00024371	XLOC_011173	17	-	51437648	51437753	3	804	lincRNA	novel
TCONS_00024371	XLOC_011173	17	-	51512255	51512581	4	804	lincRNA	novel
TCONS_00024378	XLOC_011177	17	-	52356972	52357346	1	536	lincRNA	novel
TCONS_00024378	XLOC_011177	17	-	52357768	52357928	2	536	lincRNA	novel
TCONS_00024432	XLOC_011212	17	-	54412136	54413290	1	1387	lincRNA	known
TCONS_00024432	XLOC_011212	17	-	54414656	54414866	2	1387	lincRNA	known
TCONS_00024432	XLOC_011212	17	-	54416318	54416338	3	1387	lincRNA	known
TCONS_00024451	XLOC_011220	17	-	56926018	56926103	1	501	lincRNA	novel
TCONS_00024451	XLOC_011220	17	-	56929277	56929691	2	501	lincRNA	novel
TCONS_00024531	XLOC_011244	17	-	61335445	61335630	1	589	lincRNA	novel
TCONS_00024531	XLOC_011244	17	-	61337463	61337560	2	589	lincRNA	novel
TCONS_00024531	XLOC_011244	17	-	61338546	61338649	3	589	lincRNA	novel
TCONS_00024531	XLOC_011244	17	-	61346518	61346718	4	589	lincRNA	novel
TCONS_00024532	XLOC_011244	17	-	61336471	61337560	1	1395	lincRNA	novel
TCONS_00024532	XLOC_011244	17	-	61338546	61338649	2	1395	lincRNA	novel
TCONS_00024532	XLOC_011244	17	-	61346518	61346718	3	1395	lincRNA	novel
TCONS_00024626	XLOC_011279	17	-	69254966	69256307	1	2218	lincRNA	known
TCONS_00024626	XLOC_011279	17	-	69256480	69257355	2	2218	lincRNA	known
TCONS_00024765	XLOC_011378	18	+	6381542	6381569	1	707	lincRNA	novel
TCONS_00024765	XLOC_011378	18	+	6382325	6383003	2	707	lincRNA	novel
TCONS_00024849	XLOC_011420	18	+	10533250	10533297	1	990	lincRNA	novel
TCONS_00024849	XLOC_011420	18	+	10535052	10535162	2	990	lincRNA	novel
TCONS_00024849	XLOC_011420	18	+	10552701	10553531	3	990	lincRNA	novel
TCONS_00024927	XLOC_011453	18	+	18854092	18854187	1	1796	lincRNA	known
TCONS_00024927	XLOC_011453	18	+	18884699	18884811	2	1796	lincRNA	known
TCONS_00024927	XLOC_011453	18	+	18906872	18907021	3	1796	lincRNA	known
TCONS_00024927	XLOC_011453	18	+	18942115	18942177	4	1796	lincRNA	known
TCONS_00024927	XLOC_011453	18	+	19020596	19020727	5	1796	lincRNA	known
TCONS_00024927	XLOC_011453	18	+	19025217	19025853	6	1796	lincRNA	known
TCONS_00024927	XLOC_011453	18	+	19026471	19027075	7	1796	lincRNA	known
TCONS_00024928	XLOC_011453	18	+	18977826	18978091	1	1640	lincRNA	known
TCONS_00024928	XLOC_011453	18	+	19020596	19020727	2	1640	lincRNA	known
TCONS_00024928	XLOC_011453	18	+	19025217	19025853	3	1640	lincRNA	known
TCONS_00024928	XLOC_011453	18	+	19026471	19027075	4	1640	lincRNA	known
TCONS_00024929	XLOC_011453	18	+	18983133	18983160	1	765	lincRNA	known
TCONS_00024929	XLOC_011453	18	+	19020596	19020727	2	765	lincRNA	known
TCONS_00024929	XLOC_011453	18	+	19026471	19027075	3	765	lincRNA	known
TCONS_00025053	XLOC_011520	18	+	35909195	35909452	1	726	lincRNA	novel
TCONS_00025053	XLOC_011520	18	+	35909603	35909708	2	726	lincRNA	novel
TCONS_00025053	XLOC_011520	18	+	35910569	35910930	3	726	lincRNA	novel
TCONS_00025157	XLOC_011564	18	+	50118939	50118973	1	319	lincRNA	known
TCONS_00025157	XLOC_011564	18	+	50120325	50120501	2	319	lincRNA	known
TCONS_00025157	XLOC_011564	18	+	50121559	50121600	3	319	lincRNA	known
TCONS_00025157	XLOC_011564	18	+	50138343	50138407	4	319	lincRNA	known
TCONS_00025176	XLOC_011571	18	+	52752173	52753345	1	1670	lincRNA	known
TCONS_00025176	XLOC_011571	18	+	52754951	52755165	2	1670	lincRNA	known
TCONS_00025176	XLOC_011571	18	+	52755714	52755995	3	1670	lincRNA	known
TCONS_00025175	XLOC_011571	18	+	52752173	52752571	1	896	lincRNA	known
TCONS_00025175	XLOC_011571	18	+	52754951	52755165	2	896	lincRNA	known
TCONS_00025175	XLOC_011571	18	+	52755714	52755995	3	896	lincRNA	known
TCONS_00025241	XLOC_011603	18	+	56115311	56115571	1	355	lincRNA	known
TCONS_00025241	XLOC_011603	18	+	56192809	56192902	2	355	lincRNA	known
TCONS_00025242	XLOC_011603	18	+	56115374	56115851	1	572	lincRNA	known
TCONS_00025242	XLOC_011603	18	+	56192809	56192902	2	572	lincRNA	known
TCONS_00025270	XLOC_011615	18	+	59938108	59938430	1	1486	lincRNA	known
TCONS_00025270	XLOC_011615	18	+	59938520	59938575	2	1486	lincRNA	known
TCONS_00025270	XLOC_011615	18	+	59939872	59939938	3	1486	lincRNA	known
TCONS_00025270	XLOC_011615	18	+	59974212	59974274	4	1486	lincRNA	known
TCONS_00025270	XLOC_011615	18	+	60043376	60043468	5	1486	lincRNA	known
TCONS_00025270	XLOC_011615	18	+	60049101	60049250	6	1486	lincRNA	known
TCONS_00025270	XLOC_011615	18	+	60049350	60049480	7	1486	lincRNA	known
TCONS_00025270	XLOC_011615	18	+	60049587	60050189	8	1486	lincRNA	known
TCONS_00025269	XLOC_011615	18	+	59938108	59938463	1	1463	lincRNA	known
TCONS_00025269	XLOC_011615	18	+	59939872	59939938	2	1463	lincRNA	known
TCONS_00025269	XLOC_011615	18	+	59974212	59974274	3	1463	lincRNA	known
TCONS_00025269	XLOC_011615	18	+	60043376	60043468	4	1463	lincRNA	known
TCONS_00025269	XLOC_011615	18	+	60049101	60049250	5	1463	lincRNA	known
TCONS_00025269	XLOC_011615	18	+	60049350	60049480	6	1463	lincRNA	known
TCONS_00025269	XLOC_011615	18	+	60049587	60050189	7	1463	lincRNA	known
TCONS_00025291	XLOC_011621	18	+	60932827	60932979	1	669	lincRNA	known
TCONS_00025291	XLOC_011621	18	+	60933488	60933609	2	669	lincRNA	known
TCONS_00025291	XLOC_011621	18	+	60936390	60936783	3	669	lincRNA	known
TCONS_00025337	XLOC_011644	18	-	4874107	4874181	1	253	lincRNA	novel
TCONS_00025337	XLOC_011644	18	-	4876741	4876918	2	253	lincRNA	novel
TCONS_00025542	XLOC_011738	18	-	18770403	18772022	1	1787	lincRNA	known
TCONS_00025542	XLOC_011738	18	-	18775721	18775887	2	1787	lincRNA	known
TCONS_00025562	XLOC_011748	18	-	20241787	20242356	1	1369	lincRNA	novel
TCONS_00025562	XLOC_011748	18	-	20259260	20260058	2	1369	lincRNA	novel
TCONS_00025702	XLOC_011822	18	-	42140245	42140348	1	434	lincRNA	known
TCONS_00025702	XLOC_011822	18	-	42168608	42168669	2	434	lincRNA	known
TCONS_00025702	XLOC_011822	18	-	42169952	42170219	3	434	lincRNA	known
TCONS_00025703	XLOC_011822	18	-	42144614	42144635	1	353	lincRNA	known
TCONS_00025703	XLOC_011822	18	-	42168608	42168669	2	353	lincRNA	known
TCONS_00025703	XLOC_011822	18	-	42169952	42170220	3	353	lincRNA	known
TCONS_00025787	XLOC_011860	18	-	51569379	51570831	1	1573	lincRNA	novel
TCONS_00025787	XLOC_011860	18	-	51576089	51576208	2	1573	lincRNA	novel
TCONS_00025796	XLOC_011864	18	-	53402566	53402589	1	249	lincRNA	known
TCONS_00025796	XLOC_011864	18	-	53406675	53406899	2	249	lincRNA	known
TCONS_00026164	XLOC_012077	2	+	5792509	5792891	1	494	lincRNA	novel
TCONS_00026164	XLOC_012077	2	+	5793151	5793261	2	494	lincRNA	novel
TCONS_00026180	XLOC_012082	2	+	5924231	5924433	1	1308	lincRNA	known
TCONS_00026180	XLOC_012082	2	+	5925393	5926497	2	1308	lincRNA	known
TCONS_00026192	XLOC_012086	2	+	6157245	6157269	1	1029	lincRNA	novel
TCONS_00026192	XLOC_012086	2	+	6166241	6167244	2	1029	lincRNA	novel
TCONS_00026379	XLOC_012148	2	+	9615640	9616044	1	5207	lincRNA	known
TCONS_00026379	XLOC_012148	2	+	9616326	9621127	2	5207	lincRNA	known
TCONS_00026577	XLOC_012259	2	+	17688629	17688893	1	466	lincRNA	known
TCONS_00026577	XLOC_012259	2	+	17691720	17691920	2	466	lincRNA	known
TCONS_00026645	XLOC_012294	2	+	31312760	31312815	1	1201	lincRNA	novel
TCONS_00026645	XLOC_012294	2	+	31314313	31314387	2	1201	lincRNA	novel
TCONS_00026645	XLOC_012294	2	+	31320552	31321561	3	1201	lincRNA	novel
TCONS_00026645	XLOC_012294	2	+	31322424	31322483	4	1201	lincRNA	novel
TCONS_00026688	XLOC_012307	2	+	35770442	35770649	1	1229	lincRNA	novel
TCONS_00026688	XLOC_012307	2	+	35782812	35782970	2	1229	lincRNA	novel
TCONS_00026688	XLOC_012307	2	+	35811040	35811218	3	1229	lincRNA	novel
TCONS_00026688	XLOC_012307	2	+	35812854	35812916	4	1229	lincRNA	novel
TCONS_00026688	XLOC_012307	2	+	35813790	35814409	5	1229	lincRNA	novel
TCONS_00026689	XLOC_012307	2	+	35812134	35812916	1	1403	lincRNA	novel
TCONS_00026689	XLOC_012307	2	+	35813790	35814409	2	1403	lincRNA	novel
TCONS_00026703	XLOC_012317	2	+	40172895	40173183	1	634	lincRNA	novel
TCONS_00026703	XLOC_012317	2	+	40180104	40180448	2	634	lincRNA	novel
TCONS_00026806	XLOC_012365	2	+	50673749	50673841	1	923	lincRNA	known
TCONS_00026806	XLOC_012365	2	+	50676282	50676375	2	923	lincRNA	known
TCONS_00026806	XLOC_012365	2	+	50679686	50679822	3	923	lincRNA	known
TCONS_00026806	XLOC_012365	2	+	50683946	50684544	4	923	lincRNA	known
TCONS_00027135	XLOC_012505	2	+	65233555	65234219	1	1840	lincRNA	known
TCONS_00027135	XLOC_012505	2	+	65239136	65239310	2	1840	lincRNA	known
TCONS_00027135	XLOC_012505	2	+	65240623	65241622	3	1840	lincRNA	known
TCONS_00027136	XLOC_012505	2	+	65233561	65233786	1	3045	lincRNA	known
TCONS_00027136	XLOC_012505	2	+	65233993	65234219	2	3045	lincRNA	known
TCONS_00027136	XLOC_012505	2	+	65239136	65239310	3	3045	lincRNA	known
TCONS_00027136	XLOC_012505	2	+	65240623	65241124	4	3045	lincRNA	known
TCONS_00027136	XLOC_012505	2	+	65244709	65246222	5	3045	lincRNA	known
TCONS_00027136	XLOC_012505	2	+	65247070	65247470	6	3045	lincRNA	known
TCONS_00027137	XLOC_012505	2	+	65233648	65234219	1	1347	lincRNA	known
TCONS_00027137	XLOC_012505	2	+	65239136	65239310	2	1347	lincRNA	known
TCONS_00027137	XLOC_012505	2	+	65240623	65241124	3	1347	lincRNA	known
TCONS_00027137	XLOC_012505	2	+	65248397	65248494	4	1347	lincRNA	known
TCONS_00027818	XLOC_012774	2	+	83265207	83265526	1	984	lincRNA	known
TCONS_00027818	XLOC_012774	2	+	83269448	83269577	2	984	lincRNA	known
TCONS_00027818	XLOC_012774	2	+	83289346	83289879	3	984	lincRNA	known
TCONS_00027922	XLOC_012814	2	+	91705003	91705736	1	792	lincRNA	known
TCONS_00027922	XLOC_012814	2	+	91709212	91709269	2	792	lincRNA	known
TCONS_00027978	XLOC_012837	2	+	98960190	98960364	1	797	lincRNA	known
TCONS_00027978	XLOC_012837	2	+	98960761	98960822	2	797	lincRNA	known
TCONS_00027978	XLOC_012837	2	+	99021189	99021748	3	797	lincRNA	known
TCONS_00027979	XLOC_012837	2	+	98960255	98960364	1	314	lincRNA	novel
TCONS_00027979	XLOC_012837	2	+	98960761	98960822	2	314	lincRNA	novel
TCONS_00027979	XLOC_012837	2	+	99065255	99065396	3	314	lincRNA	novel
TCONS_00027980	XLOC_012837	2	+	98960255	98960364	1	339	lincRNA	novel
TCONS_00027980	XLOC_012837	2	+	98960761	98960822	2	339	lincRNA	novel
TCONS_00027980	XLOC_012837	2	+	99058459	99058587	3	339	lincRNA	novel
TCONS_00027980	XLOC_012837	2	+	99069083	99069120	4	339	lincRNA	novel
TCONS_00027981	XLOC_012837	2	+	98960545	98960822	1	838	lincRNA	known
TCONS_00027981	XLOC_012837	2	+	99021189	99021748	2	838	lincRNA	known
TCONS_00028158	XLOC_012918	2	+	135980792	135980902	1	1761	lincRNA	novel
TCONS_00028158	XLOC_012918	2	+	135987542	135987745	2	1761	lincRNA	novel
TCONS_00028158	XLOC_012918	2	+	135990427	135990519	3	1761	lincRNA	novel
TCONS_00028158	XLOC_012918	2	+	135993777	135995129	4	1761	lincRNA	novel
TCONS_00028167	XLOC_012923	2	+	137337987	137338064	1	1585	lincRNA	novel
TCONS_00028167	XLOC_012923	2	+	137377844	137377938	2	1585	lincRNA	novel
TCONS_00028167	XLOC_012923	2	+	137421351	137421405	3	1585	lincRNA	novel
TCONS_00028167	XLOC_012923	2	+	137434776	137434907	4	1585	lincRNA	novel
TCONS_00028167	XLOC_012923	2	+	137452850	137454074	5	1585	lincRNA	novel
TCONS_00028304	XLOC_012980	2	+	147016299	147016426	1	1448	lincRNA	known
TCONS_00028304	XLOC_012980	2	+	147017102	147018421	2	1448	lincRNA	known
TCONS_00028311	XLOC_012986	2	+	147403854	147404598	1	1194	lincRNA	known
TCONS_00028311	XLOC_012986	2	+	147404735	147405002	2	1194	lincRNA	known
TCONS_00028311	XLOC_012986	2	+	147405499	147405679	3	1194	lincRNA	known
TCONS_00028447	XLOC_013051	2	+	157603967	157604088	1	928	lincRNA	known
TCONS_00028447	XLOC_013051	2	+	157604355	157605160	2	928	lincRNA	known
TCONS_00028675	XLOC_013163	2	-	3960627	3960783	1	472	lincRNA	novel
TCONS_00028675	XLOC_013163	2	-	3964122	3964436	2	472	lincRNA	novel
TCONS_00028784	XLOC_013197	2	-	5804578	5804635	1	791	lincRNA	known
TCONS_00028784	XLOC_013197	2	-	5805332	5805547	2	791	lincRNA	known
TCONS_00028784	XLOC_013197	2	-	5806033	5806549	3	791	lincRNA	known
TCONS_00028837	XLOC_013218	2	-	6518522	6518906	1	546	lincRNA	known
TCONS_00028837	XLOC_013218	2	-	6523198	6523358	2	546	lincRNA	known
TCONS_00029171	XLOC_013403	2	-	19364902	19364948	1	210	lincRNA	known
TCONS_00029171	XLOC_013403	2	-	19376709	19376871	2	210	lincRNA	known
TCONS_00029621	XLOC_013621	2	-	65442602	65442991	1	639	lincRNA	known
TCONS_00029621	XLOC_013621	2	-	65447066	65447314	2	639	lincRNA	known
TCONS_00029691	XLOC_013649	2	-	67167086	67167136	1	239	lincRNA	novel
TCONS_00029691	XLOC_013649	2	-	67183144	67183331	2	239	lincRNA	novel
TCONS_00029845	XLOC_013722	2	-	71596611	71596666	1	365	lincRNA	novel
TCONS_00029845	XLOC_013722	2	-	71606433	71606569	2	365	lincRNA	novel
TCONS_00029845	XLOC_013722	2	-	71607158	71607329	3	365	lincRNA	novel
TCONS_00030074	XLOC_013819	2	-	77866307	77866758	1	1375	lincRNA	novel
TCONS_00030074	XLOC_013819	2	-	77867634	77868556	2	1375	lincRNA	novel
TCONS_00030248	XLOC_013870	2	-	83258466	83258859	1	659	lincRNA	novel
TCONS_00030248	XLOC_013870	2	-	83264829	83265093	2	659	lincRNA	novel
TCONS_00030312	XLOC_013904	2	-	90010757	90010827	1	439	lincRNA	novel
TCONS_00030312	XLOC_013904	2	-	90011039	90011406	2	439	lincRNA	novel
TCONS_00030501	XLOC_013985	2	-	124472321	124472455	1	411	lincRNA	novel
TCONS_00030501	XLOC_013985	2	-	124520850	124520942	2	411	lincRNA	novel
TCONS_00030501	XLOC_013985	2	-	124525353	124525462	3	411	lincRNA	novel
TCONS_00030501	XLOC_013985	2	-	124543154	124543226	4	411	lincRNA	novel
TCONS_00030545	XLOC_014009	2	-	136291283	136292672	1	3007	lincRNA	known
TCONS_00030545	XLOC_014009	2	-	136296350	136297966	2	3007	lincRNA	known
TCONS_00030546	XLOC_014009	2	-	136291283	136292672	1	2145	lincRNA	known
TCONS_00030546	XLOC_014009	2	-	136303118	136303195	2	2145	lincRNA	known
TCONS_00030546	XLOC_014009	2	-	136312146	136312822	3	2145	lincRNA	known
TCONS_00030547	XLOC_014009	2	-	136291283	136292672	1	1529	lincRNA	known
TCONS_00030547	XLOC_014009	2	-	136332900	136332977	2	1529	lincRNA	known
TCONS_00030547	XLOC_014009	2	-	136334662	136334722	3	1529	lincRNA	known
TCONS_00030612	XLOC_014036	2	-	142395940	142396031	1	1882	lincRNA	known
TCONS_00030612	XLOC_014036	2	-	142396259	142398048	2	1882	lincRNA	known
TCONS_00030618	XLOC_014040	2	-	142832503	142832968	1	1046	lincRNA	known
TCONS_00030618	XLOC_014040	2	-	142833735	142834314	2	1046	lincRNA	known
TCONS_00030624	XLOC_014043	2	-	143488313	143488379	1	750	lincRNA	novel
TCONS_00030624	XLOC_014043	2	-	143488746	143489428	2	750	lincRNA	novel
TCONS_00030867	XLOC_014138	2	-	157628983	157636996	1	9307	lincRNA	known
TCONS_00030867	XLOC_014138	2	-	157637131	157638423	2	9307	lincRNA	known
TCONS_00030869	XLOC_014138	2	-	157628983	157636996	1	8554	lincRNA	known
TCONS_00030869	XLOC_014138	2	-	157639660	157640199	2	8554	lincRNA	known
TCONS_00030868	XLOC_014138	2	-	157628983	157636996	1	8548	lincRNA	known
TCONS_00030868	XLOC_014138	2	-	157639666	157640199	2	8548	lincRNA	known
TCONS_00031261	XLOC_014459	3	+	4195599	4195665	1	746	lincRNA	novel
TCONS_00031261	XLOC_014459	3	+	4199428	4200106	2	746	lincRNA	novel
TCONS_00031281	XLOC_014465	3	+	4732886	4733224	1	576	lincRNA	novel
TCONS_00031281	XLOC_014465	3	+	4739083	4739192	2	576	lincRNA	novel
TCONS_00031281	XLOC_014465	3	+	4739617	4739743	3	576	lincRNA	novel
TCONS_00031297	XLOC_014472	3	+	5289487	5289520	1	417	lincRNA	novel
TCONS_00031297	XLOC_014472	3	+	5289780	5290162	2	417	lincRNA	novel
TCONS_00031422	XLOC_014524	3	+	8501785	8502032	1	3916	lincRNA	known
TCONS_00031422	XLOC_014524	3	+	8504228	8504493	2	3916	lincRNA	known
TCONS_00031422	XLOC_014524	3	+	8508582	8511983	3	3916	lincRNA	known
TCONS_00031423	XLOC_014524	3	+	8502063	8502399	1	4005	lincRNA	known
TCONS_00031423	XLOC_014524	3	+	8504228	8504493	2	4005	lincRNA	known
TCONS_00031423	XLOC_014524	3	+	8508582	8511983	3	4005	lincRNA	known
TCONS_00031424	XLOC_014524	3	+	8502270	8502399	1	1512	lincRNA	known
TCONS_00031424	XLOC_014524	3	+	8504228	8505609	2	1512	lincRNA	known
TCONS_00031445	XLOC_014533	3	+	9631224	9631595	1	428	lincRNA	known
TCONS_00031445	XLOC_014533	3	+	9632174	9632229	2	428	lincRNA	known
TCONS_00031892	XLOC_014705	3	+	39278098	39278160	1	584	lincRNA	known
TCONS_00031892	XLOC_014705	3	+	39279841	39280065	2	584	lincRNA	known
TCONS_00031892	XLOC_014705	3	+	39289676	39289971	3	584	lincRNA	known
TCONS_00031894	XLOC_014705	3	+	39279264	39279370	1	388	lincRNA	known
TCONS_00031894	XLOC_014705	3	+	39279841	39280065	2	388	lincRNA	known
TCONS_00031894	XLOC_014705	3	+	39283482	39283537	3	388	lincRNA	known
TCONS_00031919	XLOC_014713	3	+	40159256	40161957	1	2838	lincRNA	novel
TCONS_00031919	XLOC_014713	3	+	40162226	40162361	2	2838	lincRNA	novel
TCONS_00031935	XLOC_014721	3	+	40546792	40546941	1	1257	lincRNA	known
TCONS_00031935	XLOC_014721	3	+	40554842	40555948	2	1257	lincRNA	known
TCONS_00032024	XLOC_014748	3	+	41435970	41436020	1	1158	lincRNA	known
TCONS_00032024	XLOC_014748	3	+	41437708	41437824	2	1158	lincRNA	known
TCONS_00032024	XLOC_014748	3	+	41438488	41439477	3	1158	lincRNA	known
TCONS_00032032	XLOC_014753	3	+	41521641	41522030	1	748	lincRNA	known
TCONS_00032032	XLOC_014753	3	+	41522294	41522453	2	748	lincRNA	known
TCONS_00032032	XLOC_014753	3	+	41522956	41523026	3	748	lincRNA	known
TCONS_00032032	XLOC_014753	3	+	41525489	41525615	4	748	lincRNA	known
TCONS_00032040	XLOC_014757	3	+	41640939	41642898	1	2583	lincRNA	known
TCONS_00032040	XLOC_014757	3	+	41643856	41644478	2	2583	lincRNA	known
TCONS_00032142	XLOC_014809	3	+	45617892	45618006	1	769	lincRNA	novel
TCONS_00032142	XLOC_014809	3	+	45618827	45619480	2	769	lincRNA	novel
TCONS_00032159	XLOC_014818	3	+	46620869	46621086	1	473	lincRNA	known
TCONS_00032159	XLOC_014818	3	+	46686315	46686569	2	473	lincRNA	known
TCONS_00032162	XLOC_014818	3	+	46718085	46718123	1	2382	lincRNA	known
TCONS_00032162	XLOC_014818	3	+	46748462	46748562	2	2382	lincRNA	known
TCONS_00032162	XLOC_014818	3	+	46760456	46760689	3	2382	lincRNA	known
TCONS_00032162	XLOC_014818	3	+	46778561	46778660	4	2382	lincRNA	known
TCONS_00032162	XLOC_014818	3	+	46778785	46780692	5	2382	lincRNA	known
TCONS_00032165	XLOC_014821	3	+	47704225	47704399	1	554	lincRNA	novel
TCONS_00032165	XLOC_014821	3	+	47712376	47712754	2	554	lincRNA	novel
TCONS_00032166	XLOC_014821	3	+	47706515	47706861	1	726	lincRNA	novel
TCONS_00032166	XLOC_014821	3	+	47712376	47712754	2	726	lincRNA	novel
TCONS_00032449	XLOC_014963	3	+	75816439	75816667	1	1195	lincRNA	known
TCONS_00032449	XLOC_014963	3	+	75817534	75817614	2	1195	lincRNA	known
TCONS_00032449	XLOC_014963	3	+	75819752	75819886	3	1195	lincRNA	known
TCONS_00032449	XLOC_014963	3	+	75847321	75847423	4	1195	lincRNA	known
TCONS_00032449	XLOC_014963	3	+	75852885	75853019	5	1195	lincRNA	known
TCONS_00032449	XLOC_014963	3	+	75853141	75853652	6	1195	lincRNA	known
TCONS_00032450	XLOC_014963	3	+	75816439	75816667	1	1025	lincRNA	known
TCONS_00032450	XLOC_014963	3	+	75817534	75817614	2	1025	lincRNA	known
TCONS_00032450	XLOC_014963	3	+	75819752	75819886	3	1025	lincRNA	known
TCONS_00032450	XLOC_014963	3	+	75847321	75847423	4	1025	lincRNA	known
TCONS_00032450	XLOC_014963	3	+	75852885	75853019	5	1025	lincRNA	known
TCONS_00032450	XLOC_014963	3	+	75875745	75875871	6	1025	lincRNA	known
TCONS_00032450	XLOC_014963	3	+	75882746	75882960	7	1025	lincRNA	known
TCONS_00032575	XLOC_015016	3	+	92218887	92219090	1	514	lincRNA	known
TCONS_00032575	XLOC_015016	3	+	92300443	92300623	2	514	lincRNA	known
TCONS_00032575	XLOC_015016	3	+	92329913	92330041	3	514	lincRNA	known
TCONS_00032635	XLOC_015048	3	+	103505138	103507791	1	2674	lincRNA	known
TCONS_00032635	XLOC_015048	3	+	103508502	103508521	2	2674	lincRNA	known
TCONS_00032711	XLOC_015079	3	+	113107165	113107527	1	445	lincRNA	novel
TCONS_00032711	XLOC_015079	3	+	113123879	113123923	2	445	lincRNA	novel
TCONS_00032711	XLOC_015079	3	+	113129204	113129240	3	445	lincRNA	novel
TCONS_00032712	XLOC_015079	3	+	113107165	113107527	1	415	lincRNA	novel
TCONS_00032712	XLOC_015079	3	+	113138338	113138389	2	415	lincRNA	novel
TCONS_00032775	XLOC_015115	3	+	118449786	118449815	1	1101	lincRNA	novel
TCONS_00032775	XLOC_015115	3	+	118456209	118457279	2	1101	lincRNA	novel
TCONS_00033073	XLOC_015232	3	-	2219749	2220770	1	1353	lincRNA	novel
TCONS_00033073	XLOC_015232	3	-	2226436	2226539	2	1353	lincRNA	novel
TCONS_00033073	XLOC_015232	3	-	2238918	2239070	3	1353	lincRNA	novel
TCONS_00033073	XLOC_015232	3	-	2242737	2242810	4	1353	lincRNA	novel
TCONS_00033074	XLOC_015232	3	-	2225497	2226539	1	1270	lincRNA	novel
TCONS_00033074	XLOC_015232	3	-	2238918	2239070	2	1270	lincRNA	novel
TCONS_00033074	XLOC_015232	3	-	2242737	2242810	3	1270	lincRNA	novel
TCONS_00033138	XLOC_015260	3	-	6629462	6629892	1	897	lincRNA	known
TCONS_00033138	XLOC_015260	3	-	6630779	6630962	2	897	lincRNA	known
TCONS_00033138	XLOC_015260	3	-	6638733	6638818	3	897	lincRNA	known
TCONS_00033138	XLOC_015260	3	-	6640063	6640147	4	897	lincRNA	known
TCONS_00033138	XLOC_015260	3	-	6640662	6640772	5	897	lincRNA	known
TCONS_00033186	XLOC_015287	3	-	9474424	9474494	1	386	lincRNA	novel
TCONS_00033186	XLOC_015287	3	-	9477416	9477730	2	386	lincRNA	novel
TCONS_00033209	XLOC_015301	3	-	10437306	10437374	1	2191	lincRNA	known
TCONS_00033209	XLOC_015301	3	-	10437946	10440067	2	2191	lincRNA	known
TCONS_00033210	XLOC_015301	3	-	10437863	10438145	1	488	lincRNA	novel
TCONS_00033210	XLOC_015301	3	-	10439863	10440067	2	488	lincRNA	novel
TCONS_00033239	XLOC_015315	3	-	11422011	11424622	1	2745	lincRNA	novel
TCONS_00033239	XLOC_015315	3	-	11424892	11425024	2	2745	lincRNA	novel
TCONS_00033363	XLOC_015364	3	-	18344317	18344680	1	593	lincRNA	known
TCONS_00033363	XLOC_015364	3	-	18353389	18353538	2	593	lincRNA	known
TCONS_00033363	XLOC_015364	3	-	18353897	18353975	3	593	lincRNA	known
TCONS_00033434	XLOC_015397	3	-	24067016	24067143	1	326	lincRNA	known
TCONS_00033434	XLOC_015397	3	-	24088123	24088234	2	326	lincRNA	known
TCONS_00033434	XLOC_015397	3	-	24120832	24120917	3	326	lincRNA	known
TCONS_00034350	XLOC_015774	3	-	83827714	83829086	1	1813	lincRNA	known
TCONS_00034350	XLOC_015774	3	-	83853099	83853151	2	1813	lincRNA	known
TCONS_00034350	XLOC_015774	3	-	83855709	83855939	3	1813	lincRNA	known
TCONS_00034350	XLOC_015774	3	-	83861998	83862074	4	1813	lincRNA	known
TCONS_00034350	XLOC_015774	3	-	83867788	83867866	5	1813	lincRNA	known
TCONS_00034351	XLOC_015774	3	-	83827714	83829086	1	1966	lincRNA	known
TCONS_00034351	XLOC_015774	3	-	83838261	83838291	2	1966	lincRNA	known
TCONS_00034351	XLOC_015774	3	-	83853099	83853151	3	1966	lincRNA	known
TCONS_00034351	XLOC_015774	3	-	83855709	83855939	4	1966	lincRNA	known
TCONS_00034351	XLOC_015774	3	-	83861998	83862074	5	1966	lincRNA	known
TCONS_00034351	XLOC_015774	3	-	83865081	83865244	6	1966	lincRNA	known
TCONS_00034351	XLOC_015774	3	-	83868016	83868052	7	1966	lincRNA	known
TCONS_00034354	XLOC_015774	3	-	83827714	83829086	1	2336	lincRNA	known
TCONS_00034354	XLOC_015774	3	-	83853099	83853151	2	2336	lincRNA	known
TCONS_00034354	XLOC_015774	3	-	83855709	83855939	3	2336	lincRNA	known
TCONS_00034354	XLOC_015774	3	-	83861998	83862074	4	2336	lincRNA	known
TCONS_00034354	XLOC_015774	3	-	83865081	83865244	5	2336	lincRNA	known
TCONS_00034354	XLOC_015774	3	-	83867788	83868225	6	2336	lincRNA	known
TCONS_00034352	XLOC_015774	3	-	83827714	83828596	1	1847	lincRNA	known
TCONS_00034352	XLOC_015774	3	-	83828691	83829086	2	1847	lincRNA	known
TCONS_00034352	XLOC_015774	3	-	83853099	83853151	3	1847	lincRNA	known
TCONS_00034352	XLOC_015774	3	-	83861998	83862074	4	1847	lincRNA	known
TCONS_00034352	XLOC_015774	3	-	83867788	83868225	5	1847	lincRNA	known
TCONS_00034355	XLOC_015774	3	-	83827714	83829086	1	2106	lincRNA	known
TCONS_00034355	XLOC_015774	3	-	83853099	83853151	2	2106	lincRNA	known
TCONS_00034355	XLOC_015774	3	-	83855709	83855939	3	2106	lincRNA	known
TCONS_00034355	XLOC_015774	3	-	83861877	83862074	4	2106	lincRNA	known
TCONS_00034355	XLOC_015774	3	-	83868069	83868319	5	2106	lincRNA	known
TCONS_00034356	XLOC_015774	3	-	83845648	83845666	1	438	lincRNA	known
TCONS_00034356	XLOC_015774	3	-	83853099	83853151	2	438	lincRNA	known
TCONS_00034356	XLOC_015774	3	-	83855709	83855939	3	438	lincRNA	known
TCONS_00034356	XLOC_015774	3	-	83861998	83862074	4	438	lincRNA	known
TCONS_00034356	XLOC_015774	3	-	83867788	83867845	5	438	lincRNA	known
TCONS_00034621	XLOC_015884	3	-	117297253	117297408	1	221	lincRNA	known
TCONS_00034621	XLOC_015884	3	-	117297558	117297622	2	221	lincRNA	known
TCONS_00034622	XLOC_015884	3	-	117297253	117297408	1	376	lincRNA	known
TCONS_00034622	XLOC_015884	3	-	117297520	117297739	2	376	lincRNA	known
TCONS_00034647	XLOC_015896	3	-	118602964	118603821	1	1180	lincRNA	known
TCONS_00034647	XLOC_015896	3	-	118608138	118608256	2	1180	lincRNA	known
TCONS_00034647	XLOC_015896	3	-	118619396	118619465	3	1180	lincRNA	known
TCONS_00034647	XLOC_015896	3	-	118634464	118634596	4	1180	lincRNA	known
TCONS_00034774	XLOC_015946	3	-	133090994	133092225	1	1378	lincRNA	novel
TCONS_00034774	XLOC_015946	3	-	133093860	133094005	2	1378	lincRNA	novel
TCONS_00035130	XLOC_016224	4	+	187080	187433	1	1646	lincRNA	known
TCONS_00035130	XLOC_016224	4	+	187594	188201	2	1646	lincRNA	known
TCONS_00035130	XLOC_016224	4	+	193109	193792	3	1646	lincRNA	known
TCONS_00035132	XLOC_016224	4	+	187118	187186	1	1361	lincRNA	known
TCONS_00035132	XLOC_016224	4	+	187594	188201	2	1361	lincRNA	known
TCONS_00035132	XLOC_016224	4	+	193109	193792	3	1361	lincRNA	known
TCONS_00035335	XLOC_016300	4	+	16100632	16100774	1	464	lincRNA	novel
TCONS_00035335	XLOC_016300	4	+	16100979	16101089	2	464	lincRNA	novel
TCONS_00035335	XLOC_016300	4	+	16101302	16101511	3	464	lincRNA	novel
TCONS_00035336	XLOC_016300	4	+	16100640	16100774	1	300	lincRNA	known
TCONS_00035336	XLOC_016300	4	+	16100979	16101089	2	300	lincRNA	known
TCONS_00035336	XLOC_016300	4	+	16101174	16101227	3	300	lincRNA	known
TCONS_00035337	XLOC_016300	4	+	16100648	16100774	1	337	lincRNA	known
TCONS_00035337	XLOC_016300	4	+	16101302	16101511	2	337	lincRNA	known
TCONS_00035343	XLOC_016304	4	+	16548047	16548155	1	910	lincRNA	novel
TCONS_00035343	XLOC_016304	4	+	16561091	16561246	2	910	lincRNA	novel
TCONS_00035343	XLOC_016304	4	+	16582773	16583417	3	910	lincRNA	novel
TCONS_00035371	XLOC_016312	4	+	17320852	17320954	1	3112	lincRNA	novel
TCONS_00035371	XLOC_016312	4	+	17322067	17325075	2	3112	lincRNA	novel
TCONS_00035372	XLOC_016312	4	+	17321054	17321503	1	3459	lincRNA	novel
TCONS_00035372	XLOC_016312	4	+	17322067	17325075	2	3459	lincRNA	novel
TCONS_00035374	XLOC_016313	4	+	17558804	17558951	1	427	lincRNA	novel
TCONS_00035374	XLOC_016313	4	+	17559116	17559394	2	427	lincRNA	novel
TCONS_00035530	XLOC_016379	4	+	42166620	42166683	1	2471	lincRNA	known
TCONS_00035530	XLOC_016379	4	+	42167062	42169468	2	2471	lincRNA	known
TCONS_00035531	XLOC_016379	4	+	42166647	42166683	1	547	lincRNA	known
TCONS_00035531	XLOC_016379	4	+	42167109	42167266	2	547	lincRNA	known
TCONS_00035531	XLOC_016379	4	+	42169117	42169468	3	547	lincRNA	known
TCONS_00035561	XLOC_016399	4	+	46200483	46200509	1	954	lincRNA	known
TCONS_00035561	XLOC_016399	4	+	46216566	46216921	2	954	lincRNA	known
TCONS_00035561	XLOC_016399	4	+	46217057	46217627	3	954	lincRNA	known
TCONS_00035562	XLOC_016399	4	+	46215025	46215075	1	761	lincRNA	known
TCONS_00035562	XLOC_016399	4	+	46216783	46216921	2	761	lincRNA	known
TCONS_00035562	XLOC_016399	4	+	46217057	46217627	3	761	lincRNA	known
TCONS_00035563	XLOC_016399	4	+	46215052	46215075	1	646	lincRNA	novel
TCONS_00035563	XLOC_016399	4	+	46216566	46216921	2	646	lincRNA	novel
TCONS_00035563	XLOC_016399	4	+	46232123	46232302	3	646	lincRNA	novel
TCONS_00035563	XLOC_016399	4	+	46245946	46246031	4	646	lincRNA	novel
TCONS_00035565	XLOC_016399	4	+	46228417	46228778	1	566	lincRNA	novel
TCONS_00035565	XLOC_016399	4	+	46232123	46232302	2	566	lincRNA	novel
TCONS_00035565	XLOC_016399	4	+	46233036	46233059	3	566	lincRNA	novel
TCONS_00035709	XLOC_016467	4	+	77207444	77207508	1	1008	lincRNA	known
TCONS_00035709	XLOC_016467	4	+	77211512	77211657	2	1008	lincRNA	known
TCONS_00035709	XLOC_016467	4	+	77237124	77237920	3	1008	lincRNA	known
TCONS_00035810	XLOC_016513	4	+	89844383	89844481	1	1576	lincRNA	known
TCONS_00035810	XLOC_016513	4	+	89845554	89845592	2	1576	lincRNA	known
TCONS_00035810	XLOC_016513	4	+	89846315	89847752	3	1576	lincRNA	known
TCONS_00035853	XLOC_016532	4	+	94586144	94586272	1	1617	lincRNA	known
TCONS_00035853	XLOC_016532	4	+	94795176	94795312	2	1617	lincRNA	known
TCONS_00035853	XLOC_016532	4	+	94796531	94797881	3	1617	lincRNA	known
TCONS_00035854	XLOC_016532	4	+	94786775	94786894	1	1608	lincRNA	known
TCONS_00035854	XLOC_016532	4	+	94795176	94795312	2	1608	lincRNA	known
TCONS_00035854	XLOC_016532	4	+	94796531	94797881	3	1608	lincRNA	known
TCONS_00035856	XLOC_016533	4	+	94907136	94907389	1	826	lincRNA	novel
TCONS_00035856	XLOC_016533	4	+	94924268	94924533	2	826	lincRNA	novel
TCONS_00035856	XLOC_016533	4	+	94959295	94959600	3	826	lincRNA	novel
TCONS_00035855	XLOC_016533	4	+	94907136	94907389	1	560	lincRNA	novel
TCONS_00035855	XLOC_016533	4	+	94959295	94959600	2	560	lincRNA	novel
TCONS_00035857	XLOC_016533	4	+	94907203	94907389	1	235	lincRNA	novel
TCONS_00035857	XLOC_016533	4	+	94914076	94914123	2	235	lincRNA	novel
TCONS_00036565	XLOC_016810	4	+	121465987	121466146	1	2817	lincRNA	known
TCONS_00036565	XLOC_016810	4	+	121468396	121471052	2	2817	lincRNA	known
TCONS_00036750	XLOC_016875	4	+	142352572	142352838	1	1782	lincRNA	novel
TCONS_00036750	XLOC_016875	4	+	142354110	142355624	2	1782	lincRNA	novel
TCONS_00036926	XLOC_016926	4	-	9144984	9145078	1	352	lincRNA	novel
TCONS_00036926	XLOC_016926	4	-	9146054	9146310	2	352	lincRNA	novel
TCONS_00036946	XLOC_016936	4	-	15364014	15364808	1	1020	lincRNA	known
TCONS_00036946	XLOC_016936	4	-	15394440	15394631	2	1020	lincRNA	known
TCONS_00036946	XLOC_016936	4	-	15401360	15401392	3	1020	lincRNA	known
TCONS_00037067	XLOC_016996	4	-	37181143	37181866	1	1004	lincRNA	novel
TCONS_00037067	XLOC_016996	4	-	37184958	37185237	2	1004	lincRNA	novel
TCONS_00037130	XLOC_017017	4	-	41943495	41943632	1	646	lincRNA	novel
TCONS_00037130	XLOC_017017	4	-	41959036	41959543	2	646	lincRNA	novel
TCONS_00037181	XLOC_017034	4	-	46209786	46209831	1	1753	lincRNA	known
TCONS_00037181	XLOC_017034	4	-	46216701	46218407	2	1753	lincRNA	known
TCONS_00037465	XLOC_017148	4	-	90584704	90585366	1	717	lincRNA	novel
TCONS_00037465	XLOC_017148	4	-	90587418	90587471	2	717	lincRNA	novel
TCONS_00037604	XLOC_017203	4	-	98150980	98151488	1	1510	lincRNA	novel
TCONS_00037604	XLOC_017203	4	-	98203388	98203958	2	1510	lincRNA	novel
TCONS_00037604	XLOC_017203	4	-	98204230	98204659	3	1510	lincRNA	novel
TCONS_00037677	XLOC_017242	4	-	100628717	100629476	1	933	lincRNA	known
TCONS_00037677	XLOC_017242	4	-	100632044	100632216	2	933	lincRNA	known
TCONS_00038031	XLOC_017382	4	-	110270444	110271036	1	2489	lincRNA	known
TCONS_00038031	XLOC_017382	4	-	110271138	110273033	2	2489	lincRNA	known
TCONS_00038032	XLOC_017382	4	-	110270444	110271784	1	1516	lincRNA	known
TCONS_00038032	XLOC_017382	4	-	110272703	110272813	2	1516	lincRNA	known
TCONS_00038032	XLOC_017382	4	-	110273282	110273345	3	1516	lincRNA	known
TCONS_00038065	XLOC_017398	4	-	113124306	113124906	1	739	lincRNA	novel
TCONS_00038065	XLOC_017398	4	-	113125229	113125366	2	739	lincRNA	novel
TCONS_00038253	XLOC_017477	4	-	127172241	127177327	1	5592	lincRNA	novel
TCONS_00038253	XLOC_017477	4	-	127178847	127179007	2	5592	lincRNA	novel
TCONS_00038253	XLOC_017477	4	-	127182099	127182388	3	5592	lincRNA	novel
TCONS_00038253	XLOC_017477	4	-	127212062	127212115	4	5592	lincRNA	novel
TCONS_00038255	XLOC_017477	4	-	127172241	127174310	1	3028	lincRNA	known
TCONS_00038255	XLOC_017477	4	-	127177150	127177327	2	3028	lincRNA	known
TCONS_00038255	XLOC_017477	4	-	127178847	127179007	3	3028	lincRNA	known
TCONS_00038255	XLOC_017477	4	-	127179750	127179821	4	3028	lincRNA	known
TCONS_00038255	XLOC_017477	4	-	127182099	127182388	5	3028	lincRNA	known
TCONS_00038255	XLOC_017477	4	-	127182994	127183082	6	3028	lincRNA	known
TCONS_00038255	XLOC_017477	4	-	127197740	127197832	7	3028	lincRNA	known
TCONS_00038255	XLOC_017477	4	-	127212062	127212136	8	3028	lincRNA	known
TCONS_00038256	XLOC_017477	4	-	127172241	127177327	1	5797	lincRNA	known
TCONS_00038256	XLOC_017477	4	-	127178847	127179007	2	5797	lincRNA	known
TCONS_00038256	XLOC_017477	4	-	127179750	127179821	3	5797	lincRNA	known
TCONS_00038256	XLOC_017477	4	-	127182099	127182388	4	5797	lincRNA	known
TCONS_00038256	XLOC_017477	4	-	127182994	127183082	5	5797	lincRNA	known
TCONS_00038256	XLOC_017477	4	-	127212062	127212159	6	5797	lincRNA	known
TCONS_00038257	XLOC_017477	4	-	127172241	127177327	1	5766	lincRNA	novel
TCONS_00038257	XLOC_017477	4	-	127178847	127179007	2	5766	lincRNA	novel
TCONS_00038257	XLOC_017477	4	-	127182099	127182388	3	5766	lincRNA	novel
TCONS_00038257	XLOC_017477	4	-	127182994	127183082	4	5766	lincRNA	novel
TCONS_00038257	XLOC_017477	4	-	127212062	127212200	5	5766	lincRNA	novel
TCONS_00038259	XLOC_017477	4	-	127172241	127177327	1	5833	lincRNA	known
TCONS_00038259	XLOC_017477	4	-	127178847	127179007	2	5833	lincRNA	known
TCONS_00038259	XLOC_017477	4	-	127179775	127179821	3	5833	lincRNA	known
TCONS_00038259	XLOC_017477	4	-	127182099	127182388	4	5833	lincRNA	known
TCONS_00038259	XLOC_017477	4	-	127182994	127183082	5	5833	lincRNA	known
TCONS_00038259	XLOC_017477	4	-	127212062	127212220	6	5833	lincRNA	known
TCONS_00038258	XLOC_017477	4	-	127172241	127174310	1	2947	lincRNA	novel
TCONS_00038258	XLOC_017477	4	-	127177150	127177327	2	2947	lincRNA	novel
TCONS_00038258	XLOC_017477	4	-	127178847	127179007	3	2947	lincRNA	novel
TCONS_00038258	XLOC_017477	4	-	127182099	127182388	4	2947	lincRNA	novel
TCONS_00038258	XLOC_017477	4	-	127182994	127183082	5	2947	lincRNA	novel
TCONS_00038258	XLOC_017477	4	-	127212062	127212220	6	2947	lincRNA	novel
TCONS_00038267	XLOC_017482	4	-	129230339	129232525	1	2279	lincRNA	novel
TCONS_00038267	XLOC_017482	4	-	129251293	129251384	2	2279	lincRNA	novel
TCONS_00038377	XLOC_017527	4	-	139638438	139638873	1	1288	lincRNA	known
TCONS_00038377	XLOC_017527	4	-	139638943	139639623	2	1288	lincRNA	known
TCONS_00038377	XLOC_017527	4	-	139640134	139640304	3	1288	lincRNA	known
TCONS_00038428	XLOC_017539	4	-	143371966	143372731	1	919	lincRNA	known
TCONS_00038428	XLOC_017539	4	-	143383171	143383323	2	919	lincRNA	known
TCONS_00038430	XLOC_017539	4	-	143378788	143380575	1	1983	lincRNA	known
TCONS_00038430	XLOC_017539	4	-	143383171	143383365	2	1983	lincRNA	known
TCONS_00038652	XLOC_017751	5	+	1531183	1531478	1	658	lincRNA	known
TCONS_00038652	XLOC_017751	5	+	1532236	1532290	2	658	lincRNA	known
TCONS_00038652	XLOC_017751	5	+	1533700	1534006	3	658	lincRNA	known
TCONS_00038713	XLOC_017779	5	+	4355173	4355367	1	821	lincRNA	novel
TCONS_00038713	XLOC_017779	5	+	4355993	4356102	2	821	lincRNA	novel
TCONS_00038713	XLOC_017779	5	+	4363184	4363699	3	821	lincRNA	novel
TCONS_00038714	XLOC_017779	5	+	4355173	4355367	1	638	lincRNA	novel
TCONS_00038714	XLOC_017779	5	+	4363184	4363331	2	638	lincRNA	novel
TCONS_00038714	XLOC_017779	5	+	4363802	4364096	3	638	lincRNA	novel
TCONS_00038837	XLOC_017833	5	+	9339343	9339492	1	640	lincRNA	novel
TCONS_00038837	XLOC_017833	5	+	9340440	9340526	2	640	lincRNA	novel
TCONS_00038837	XLOC_017833	5	+	9344575	9344713	3	640	lincRNA	novel
TCONS_00038837	XLOC_017833	5	+	9376002	9376265	4	640	lincRNA	novel
TCONS_00038838	XLOC_017833	5	+	9339343	9339492	1	384	lincRNA	novel
TCONS_00038838	XLOC_017833	5	+	9340440	9340526	2	384	lincRNA	novel
TCONS_00038838	XLOC_017833	5	+	9344575	9344713	3	384	lincRNA	novel
TCONS_00038838	XLOC_017833	5	+	9388198	9388205	4	384	lincRNA	novel
TCONS_00038986	XLOC_017916	5	+	19645784	19646220	1	1486	lincRNA	novel
TCONS_00038986	XLOC_017916	5	+	19646656	19647704	2	1486	lincRNA	novel
TCONS_00039564	XLOC_018188	5	+	67383618	67383778	1	648	lincRNA	novel
TCONS_00039564	XLOC_018188	5	+	67394143	67394629	2	648	lincRNA	novel
TCONS_00039565	XLOC_018188	5	+	67383641	67383778	1	622	lincRNA	novel
TCONS_00039565	XLOC_018188	5	+	67394146	67394629	2	622	lincRNA	novel
TCONS_00039566	XLOC_018189	5	+	67994709	67995276	1	1304	lincRNA	novel
TCONS_00039566	XLOC_018189	5	+	67995657	67996392	2	1304	lincRNA	novel
TCONS_00039567	XLOC_018189	5	+	67994719	67995186	1	1204	lincRNA	novel
TCONS_00039567	XLOC_018189	5	+	67995657	67996392	2	1204	lincRNA	novel
TCONS_00039609	XLOC_018208	5	+	70181187	70181287	1	474	lincRNA	novel
TCONS_00039609	XLOC_018208	5	+	70181364	70181569	2	474	lincRNA	novel
TCONS_00039609	XLOC_018208	5	+	70182067	70182233	3	474	lincRNA	novel
TCONS_00039691	XLOC_018240	5	+	79823207	79823373	1	1121	lincRNA	novel
TCONS_00039691	XLOC_018240	5	+	79935367	79935533	2	1121	lincRNA	novel
TCONS_00039691	XLOC_018240	5	+	79936615	79937401	3	1121	lincRNA	novel
TCONS_00039820	XLOC_018302	5	+	89679591	89679704	1	263	lincRNA	known
TCONS_00039820	XLOC_018302	5	+	89681117	89681228	2	263	lincRNA	known
TCONS_00039820	XLOC_018302	5	+	89690028	89690064	3	263	lincRNA	known
TCONS_00039902	XLOC_018341	5	+	105372419	105372460	1	1141	lincRNA	known
TCONS_00039902	XLOC_018341	5	+	105380157	105380393	2	1141	lincRNA	known
TCONS_00039902	XLOC_018341	5	+	105381419	105381518	3	1141	lincRNA	known
TCONS_00039902	XLOC_018341	5	+	105383801	105383949	4	1141	lincRNA	known
TCONS_00039902	XLOC_018341	5	+	105386178	105386790	5	1141	lincRNA	known
TCONS_00039903	XLOC_018341	5	+	105379726	105380393	1	1312	lincRNA	known
TCONS_00039903	XLOC_018341	5	+	105381419	105381518	2	1312	lincRNA	known
TCONS_00039903	XLOC_018341	5	+	105383801	105383949	3	1312	lincRNA	known
TCONS_00039903	XLOC_018341	5	+	105386178	105386290	4	1312	lincRNA	known
TCONS_00039903	XLOC_018341	5	+	105391560	105391841	5	1312	lincRNA	known
TCONS_00039908	XLOC_018344	5	+	105712885	105713054	1	257	lincRNA	novel
TCONS_00039908	XLOC_018344	5	+	105713868	105713954	2	257	lincRNA	novel
TCONS_00040085	XLOC_018427	5	-	6262120	6262571	1	913	lincRNA	novel
TCONS_00040085	XLOC_018427	5	-	6268677	6269137	2	913	lincRNA	novel
TCONS_00040086	XLOC_018427	5	-	6264697	6264983	1	748	lincRNA	known
TCONS_00040086	XLOC_018427	5	-	6268677	6269137	2	748	lincRNA	known
TCONS_00040180	XLOC_018470	5	-	13023644	13023938	1	369	lincRNA	known
TCONS_00040180	XLOC_018470	5	-	13033123	13033196	2	369	lincRNA	known
TCONS_00040437	XLOC_018604	5	-	23100502	23100672	1	245	lincRNA	known
TCONS_00040437	XLOC_018604	5	-	23101066	23101090	2	245	lincRNA	known
TCONS_00040437	XLOC_018604	5	-	23101204	23101252	3	245	lincRNA	known
TCONS_00040697	XLOC_018716	5	-	49727448	49727535	1	350	lincRNA	known
TCONS_00040697	XLOC_018716	5	-	49732854	49732945	2	350	lincRNA	known
TCONS_00040697	XLOC_018716	5	-	49783013	49783182	3	350	lincRNA	known
TCONS_00040698	XLOC_018716	5	-	49775412	49775770	1	584	lincRNA	novel
TCONS_00040698	XLOC_018716	5	-	49783013	49783237	2	584	lincRNA	novel
TCONS_00040817	XLOC_018772	5	-	64785698	64786359	1	854	lincRNA	known
TCONS_00040817	XLOC_018772	5	-	64788592	64788732	2	854	lincRNA	known
TCONS_00040817	XLOC_018772	5	-	64804000	64804050	3	854	lincRNA	known
TCONS_00040818	XLOC_018772	5	-	64785698	64786359	1	1061	lincRNA	known
TCONS_00040818	XLOC_018772	5	-	64788592	64788732	2	1061	lincRNA	known
TCONS_00040818	XLOC_018772	5	-	64798094	64798162	3	1061	lincRNA	known
TCONS_00040818	XLOC_018772	5	-	64804000	64804188	4	1061	lincRNA	known
TCONS_00041074	XLOC_018871	5	-	81095910	81095976	1	492	lincRNA	known
TCONS_00041074	XLOC_018871	5	-	81106752	81107060	2	492	lincRNA	known
TCONS_00041074	XLOC_018871	5	-	81107560	81107675	3	492	lincRNA	known
TCONS_00041075	XLOC_018871	5	-	81095910	81095976	1	498	lincRNA	known
TCONS_00041075	XLOC_018871	5	-	81106752	81107060	2	498	lincRNA	known
TCONS_00041075	XLOC_018871	5	-	81107574	81107695	3	498	lincRNA	known
TCONS_00041076	XLOC_018871	5	-	81100132	81100946	1	1241	lincRNA	known
TCONS_00041076	XLOC_018871	5	-	81106752	81107060	2	1241	lincRNA	known
TCONS_00041076	XLOC_018871	5	-	81107574	81107690	3	1241	lincRNA	known
TCONS_00041077	XLOC_018871	5	-	81100132	81100946	1	1260	lincRNA	known
TCONS_00041077	XLOC_018871	5	-	81106752	81107060	2	1260	lincRNA	known
TCONS_00041077	XLOC_018871	5	-	81107560	81107695	3	1260	lincRNA	known
TCONS_00041147	XLOC_018908	5	-	86498023	86498226	1	1239	lincRNA	novel
TCONS_00041147	XLOC_018908	5	-	86499821	86500027	2	1239	lincRNA	novel
TCONS_00041147	XLOC_018908	5	-	86500669	86500804	3	1239	lincRNA	novel
TCONS_00041147	XLOC_018908	5	-	86502465	86503156	4	1239	lincRNA	novel
TCONS_00041158	XLOC_018912	5	-	86744987	86745093	1	303	lincRNA	known
TCONS_00041158	XLOC_018912	5	-	86788193	86788388	2	303	lincRNA	known
TCONS_00041235	XLOC_018946	5	-	93819830	93820224	1	639	lincRNA	novel
TCONS_00041235	XLOC_018946	5	-	93829896	93830139	2	639	lincRNA	novel
TCONS_00041241	XLOC_018951	5	-	94783461	94785373	1	2031	lincRNA	known
TCONS_00041241	XLOC_018951	5	-	94785967	94786084	2	2031	lincRNA	known
TCONS_00041257	XLOC_018960	5	-	101195780	101195881	1	381	lincRNA	novel
TCONS_00041257	XLOC_018960	5	-	101200516	101200794	2	381	lincRNA	novel
TCONS_00041595	XLOC_019200	6	+	8574417	8574470	1	1409	lincRNA	known
TCONS_00041595	XLOC_019200	6	+	8576935	8578289	2	1409	lincRNA	known
TCONS_00041601	XLOC_019206	6	+	10248325	10248354	1	345	lincRNA	novel
TCONS_00041601	XLOC_019206	6	+	10251024	10251293	2	345	lincRNA	novel
TCONS_00041601	XLOC_019206	6	+	10323362	10323406	3	345	lincRNA	novel
TCONS_00041701	XLOC_019255	6	+	16879331	16880659	1	2293	lincRNA	known
TCONS_00041701	XLOC_019255	6	+	16880896	16881859	2	2293	lincRNA	known
TCONS_00041754	XLOC_019277	6	+	18527306	18528027	1	897	lincRNA	novel
TCONS_00041754	XLOC_019277	6	+	18533284	18533458	2	897	lincRNA	novel
TCONS_00041755	XLOC_019277	6	+	18527418	18528027	1	762	lincRNA	known
TCONS_00041755	XLOC_019277	6	+	18557223	18557307	2	762	lincRNA	known
TCONS_00041755	XLOC_019277	6	+	18677171	18677237	3	762	lincRNA	known
TCONS_00042006	XLOC_019389	6	+	40948609	40949068	1	687	lincRNA	novel
TCONS_00042006	XLOC_019389	6	+	40961171	40961397	2	687	lincRNA	novel
TCONS_00042129	XLOC_019435	6	+	44065194	44067641	1	6700	lincRNA	known
TCONS_00042129	XLOC_019435	6	+	44069049	44073300	2	6700	lincRNA	known
TCONS_00042128	XLOC_019435	6	+	44065194	44067619	1	6678	lincRNA	known
TCONS_00042128	XLOC_019435	6	+	44069049	44073300	2	6678	lincRNA	known
TCONS_00042130	XLOC_019435	6	+	44065197	44067865	1	6921	lincRNA	known
TCONS_00042130	XLOC_019435	6	+	44069049	44073300	2	6921	lincRNA	known
TCONS_00042147	XLOC_019442	6	+	44528397	44528536	1	299	lincRNA	known
TCONS_00042147	XLOC_019442	6	+	44531068	44531172	2	299	lincRNA	known
TCONS_00042147	XLOC_019442	6	+	44535424	44535477	3	299	lincRNA	known
TCONS_00042246	XLOC_019495	6	+	46563216	46563425	1	1002	lincRNA	known
TCONS_00042246	XLOC_019495	6	+	46602802	46603369	2	1002	lincRNA	known
TCONS_00042246	XLOC_019495	6	+	46603690	46603913	3	1002	lincRNA	known
TCONS_00042248	XLOC_019496	6	+	46616115	46616273	1	262	lincRNA	known
TCONS_00042248	XLOC_019496	6	+	46616364	46616436	2	262	lincRNA	known
TCONS_00042248	XLOC_019496	6	+	46616710	46616739	3	262	lincRNA	known
TCONS_00042254	XLOC_019498	6	+	46746392	46746578	1	562	lincRNA	novel
TCONS_00042254	XLOC_019498	6	+	46750365	46750739	2	562	lincRNA	novel
TCONS_00042496	XLOC_019593	6	+	51173825	51175184	1	5373	lincRNA	known
TCONS_00042496	XLOC_019593	6	+	51175375	51178466	2	5373	lincRNA	known
TCONS_00042496	XLOC_019593	6	+	51178603	51179523	3	5373	lincRNA	known
TCONS_00042969	XLOC_019803	6	+	69335540	69338553	1	3710	lincRNA	known
TCONS_00042969	XLOC_019803	6	+	69338626	69339321	2	3710	lincRNA	known
TCONS_00043130	XLOC_019873	6	+	77154600	77154734	1	448	lincRNA	novel
TCONS_00043130	XLOC_019873	6	+	77160914	77161205	2	448	lincRNA	novel
TCONS_00043130	XLOC_019873	6	+	77163334	77163354	3	448	lincRNA	novel
TCONS_00043250	XLOC_019920	6	+	81668596	81668692	1	448	lincRNA	known
TCONS_00043250	XLOC_019920	6	+	81672502	81672852	2	448	lincRNA	known
TCONS_00043424	XLOC_019994	6	+	94267567	94267680	1	1207	lincRNA	known
TCONS_00043424	XLOC_019994	6	+	94295213	94295275	2	1207	lincRNA	known
TCONS_00043424	XLOC_019994	6	+	94332817	94332980	3	1207	lincRNA	known
TCONS_00043424	XLOC_019994	6	+	94335829	94335974	4	1207	lincRNA	known
TCONS_00043424	XLOC_019994	6	+	94344916	94345635	5	1207	lincRNA	known
TCONS_00043423	XLOC_019994	6	+	94267567	94267680	1	1207	lincRNA	known
TCONS_00043423	XLOC_019994	6	+	94295213	94295275	2	1207	lincRNA	known
TCONS_00043423	XLOC_019994	6	+	94324907	94325070	3	1207	lincRNA	known
TCONS_00043423	XLOC_019994	6	+	94335829	94335974	4	1207	lincRNA	known
TCONS_00043423	XLOC_019994	6	+	94344916	94345635	5	1207	lincRNA	known
TCONS_00043425	XLOC_019994	6	+	94267567	94267680	1	796	lincRNA	known
TCONS_00043425	XLOC_019994	6	+	94295213	94295275	2	796	lincRNA	known
TCONS_00043425	XLOC_019994	6	+	94335829	94335974	3	796	lincRNA	known
TCONS_00043425	XLOC_019994	6	+	94361231	94361703	4	796	lincRNA	known
TCONS_00043436	XLOC_020000	6	+	96818932	96820203	1	2138	lincRNA	known
TCONS_00043436	XLOC_020000	6	+	96820630	96821495	2	2138	lincRNA	known
TCONS_00043495	XLOC_020023	6	+	102551740	102551786	1	947	lincRNA	novel
TCONS_00043495	XLOC_020023	6	+	102553206	102554105	2	947	lincRNA	novel
TCONS_00043586	XLOC_020065	6	+	119905852	119906211	1	422	lincRNA	novel
TCONS_00043586	XLOC_020065	6	+	119907337	119907398	2	422	lincRNA	novel
TCONS_00043631	XLOC_020082	6	+	128234672	128234901	1	711	lincRNA	known
TCONS_00043631	XLOC_020082	6	+	128273988	128274043	2	711	lincRNA	known
TCONS_00043631	XLOC_020082	6	+	128283410	128283834	3	711	lincRNA	known
TCONS_00043667	XLOC_020098	6	+	135832551	135832799	1	332	lincRNA	novel
TCONS_00043667	XLOC_020098	6	+	135853172	135853254	2	332	lincRNA	novel
TCONS_00043766	XLOC_020142	6	+	147753131	147753355	1	3299	lincRNA	known
TCONS_00043766	XLOC_020142	6	+	147754583	147757656	2	3299	lincRNA	known
TCONS_00044065	XLOC_020272	6	-	8556525	8556647	1	2476	lincRNA	known
TCONS_00044065	XLOC_020272	6	-	8559752	8562104	2	2476	lincRNA	known
TCONS_00044066	XLOC_020272	6	-	8557024	8557139	1	2469	lincRNA	known
TCONS_00044066	XLOC_020272	6	-	8559752	8562104	2	2469	lincRNA	known
TCONS_00044067	XLOC_020272	6	-	8557621	8559562	1	3791	lincRNA	known
TCONS_00044067	XLOC_020272	6	-	8559752	8560137	2	3791	lincRNA	known
TCONS_00044067	XLOC_020272	6	-	8560642	8562104	3	3791	lincRNA	known
TCONS_00044075	XLOC_020278	6	-	10694780	10694850	1	483	lincRNA	known
TCONS_00044075	XLOC_020278	6	-	10702181	10702314	2	483	lincRNA	known
TCONS_00044075	XLOC_020278	6	-	10721880	10722157	3	483	lincRNA	known
TCONS_00044304	XLOC_020383	6	-	27615836	27617450	1	1829	lincRNA	novel
TCONS_00044304	XLOC_020383	6	-	27622988	27623201	2	1829	lincRNA	novel
TCONS_00044306	XLOC_020385	6	-	28125400	28126561	1	1431	lincRNA	known
TCONS_00044306	XLOC_020385	6	-	28127027	28127240	2	1431	lincRNA	known
TCONS_00044306	XLOC_020385	6	-	28134432	28134486	3	1431	lincRNA	known
TCONS_00044307	XLOC_020386	6	-	28519570	28519714	1	447	lincRNA	novel
TCONS_00044307	XLOC_020386	6	-	28522723	28523024	2	447	lincRNA	novel
TCONS_00044308	XLOC_020386	6	-	28519570	28519834	1	576	lincRNA	novel
TCONS_00044308	XLOC_020386	6	-	28522723	28523033	2	576	lincRNA	novel
TCONS_00044734	XLOC_020564	6	-	48908763	48910991	1	2868	lincRNA	known
TCONS_00044734	XLOC_020564	6	-	48911892	48912177	2	2868	lincRNA	known
TCONS_00044734	XLOC_020564	6	-	48914436	48914500	3	2868	lincRNA	known
TCONS_00044734	XLOC_020564	6	-	48915197	48915484	4	2868	lincRNA	known
TCONS_00044733	XLOC_020564	6	-	48908763	48910991	1	2803	lincRNA	known
TCONS_00044733	XLOC_020564	6	-	48911892	48912177	2	2803	lincRNA	known
TCONS_00044733	XLOC_020564	6	-	48915197	48915484	3	2803	lincRNA	known
TCONS_00044839	XLOC_020606	6	-	50406274	50406830	1	648	lincRNA	novel
TCONS_00044839	XLOC_020606	6	-	50406939	50407029	2	648	lincRNA	novel
TCONS_00045049	XLOC_020690	6	-	54680775	54682060	1	2507	lincRNA	novel
TCONS_00045049	XLOC_020690	6	-	54682321	54683304	2	2507	lincRNA	novel
TCONS_00045049	XLOC_020690	6	-	54683715	54683951	3	2507	lincRNA	novel
TCONS_00045050	XLOC_020690	6	-	54680775	54683304	1	3015	lincRNA	novel
TCONS_00045050	XLOC_020690	6	-	54683715	54684199	2	3015	lincRNA	novel
TCONS_00045076	XLOC_020707	6	-	55957862	55958880	1	1140	lincRNA	known
TCONS_00045076	XLOC_020707	6	-	55959355	55959475	2	1140	lincRNA	known
TCONS_00045297	XLOC_020793	6	-	65089073	65090152	1	1439	lincRNA	known
TCONS_00045297	XLOC_020793	6	-	65090618	65090837	2	1439	lincRNA	known
TCONS_00045297	XLOC_020793	6	-	65096767	65096905	3	1439	lincRNA	known
TCONS_00045296	XLOC_020793	6	-	65089073	65090152	1	1564	lincRNA	known
TCONS_00045296	XLOC_020793	6	-	65090494	65090837	2	1564	lincRNA	known
TCONS_00045296	XLOC_020793	6	-	65096766	65096905	3	1564	lincRNA	known
TCONS_00045295	XLOC_020793	6	-	65089073	65090837	1	1905	lincRNA	known
TCONS_00045295	XLOC_020793	6	-	65096766	65096905	2	1905	lincRNA	known
TCONS_00045298	XLOC_020793	6	-	65089073	65090152	1	1570	lincRNA	known
TCONS_00045298	XLOC_020793	6	-	65090494	65090837	2	1570	lincRNA	known
TCONS_00045298	XLOC_020793	6	-	65096767	65096912	3	1570	lincRNA	known
TCONS_00045299	XLOC_020793	6	-	65089073	65090152	1	1450	lincRNA	known
TCONS_00045299	XLOC_020793	6	-	65090625	65090837	2	1450	lincRNA	known
TCONS_00045299	XLOC_020793	6	-	65096767	65096923	3	1450	lincRNA	known
TCONS_00045374	XLOC_020825	6	-	69799424	69799458	1	278	lincRNA	novel
TCONS_00045374	XLOC_020825	6	-	69799542	69799784	2	278	lincRNA	novel
TCONS_00045600	XLOC_020930	6	-	82221324	82221457	1	325	lincRNA	known
TCONS_00045600	XLOC_020930	6	-	82232928	82233118	2	325	lincRNA	known
TCONS_00045601	XLOC_020930	6	-	82227995	82228117	1	313	lincRNA	known
TCONS_00045601	XLOC_020930	6	-	82232928	82233117	2	313	lincRNA	known
TCONS_00045602	XLOC_020930	6	-	82227995	82228075	1	272	lincRNA	known
TCONS_00045602	XLOC_020930	6	-	82232928	82233118	2	272	lincRNA	known
TCONS_00045838	XLOC_021018	6	-	96146154	96146914	1	1220	lincRNA	known
TCONS_00045838	XLOC_021018	6	-	96149314	96149441	2	1220	lincRNA	known
TCONS_00045838	XLOC_021018	6	-	96161891	96162221	3	1220	lincRNA	known
TCONS_00045915	XLOC_021052	6	-	105182479	105182575	1	264	lincRNA	novel
TCONS_00045915	XLOC_021052	6	-	105203935	105204101	2	264	lincRNA	novel
TCONS_00045945	XLOC_021069	6	-	111533975	111534023	1	1091	lincRNA	novel
TCONS_00045945	XLOC_021069	6	-	111535348	111536389	2	1091	lincRNA	novel
TCONS_00046054	XLOC_021111	6	-	131775836	131778481	1	2972	lincRNA	known
TCONS_00046054	XLOC_021111	6	-	131778647	131778693	2	2972	lincRNA	known
TCONS_00046054	XLOC_021111	6	-	131886627	131886718	3	2972	lincRNA	known
TCONS_00046054	XLOC_021111	6	-	131921391	131921497	4	2972	lincRNA	known
TCONS_00046054	XLOC_021111	6	-	131964071	131964150	5	2972	lincRNA	known
TCONS_00046055	XLOC_021111	6	-	131775836	131778481	1	2901	lincRNA	known
TCONS_00046055	XLOC_021111	6	-	131778647	131778693	2	2901	lincRNA	known
TCONS_00046055	XLOC_021111	6	-	131886627	131886718	3	2901	lincRNA	known
TCONS_00046055	XLOC_021111	6	-	131964071	131964186	4	2901	lincRNA	known
TCONS_00046312	XLOC_021228	6	-	155967979	155969021	1	1633	lincRNA	novel
TCONS_00046312	XLOC_021228	6	-	155970856	155970969	2	1633	lincRNA	novel
TCONS_00046312	XLOC_021228	6	-	155974363	155974838	3	1633	lincRNA	novel
TCONS_00046338	XLOC_021239	6	-	156611780	156612182	1	1281	lincRNA	novel
TCONS_00046338	XLOC_021239	6	-	156615995	156616872	2	1281	lincRNA	novel
TCONS_00046339	XLOC_021240	6	-	156865984	156867086	1	1293	lincRNA	novel
TCONS_00046339	XLOC_021240	6	-	156867520	156867709	2	1293	lincRNA	novel
TCONS_00046722	XLOC_021542	7	+	10356476	10356533	1	220	lincRNA	known
TCONS_00046722	XLOC_021542	7	+	10360231	10360392	2	220	lincRNA	known
TCONS_00046723	XLOC_021542	7	+	10356555	10356694	1	302	lincRNA	known
TCONS_00046723	XLOC_021542	7	+	10360231	10360392	2	302	lincRNA	known
TCONS_00046737	XLOC_021549	7	+	12742491	12742521	1	866	lincRNA	novel
TCONS_00046737	XLOC_021549	7	+	12743661	12744495	2	866	lincRNA	novel
TCONS_00046797	XLOC_021577	7	+	21958327	21958639	1	468	lincRNA	novel
TCONS_00046797	XLOC_021577	7	+	21960046	21960200	2	468	lincRNA	novel
TCONS_00046822	XLOC_021597	7	+	23062944	23063087	1	671	lincRNA	novel
TCONS_00046822	XLOC_021597	7	+	23065155	23065255	2	671	lincRNA	novel
TCONS_00046822	XLOC_021597	7	+	23068011	23068436	3	671	lincRNA	novel
TCONS_00047232	XLOC_021727	7	+	30914833	30915142	1	2067	lincRNA	novel
TCONS_00047232	XLOC_021727	7	+	30925852	30927608	2	2067	lincRNA	novel
TCONS_00047233	XLOC_021727	7	+	30925246	30925337	1	1849	lincRNA	novel
TCONS_00047233	XLOC_021727	7	+	30925852	30927608	2	1849	lincRNA	novel
TCONS_00047246	XLOC_021733	7	+	33226721	33226827	1	419	lincRNA	novel
TCONS_00047246	XLOC_021733	7	+	33226923	33227234	2	419	lincRNA	novel
TCONS_00047347	XLOC_021772	7	+	39210502	39210815	1	1276	lincRNA	known
TCONS_00047347	XLOC_021772	7	+	39214206	39214280	2	1276	lincRNA	known
TCONS_00047347	XLOC_021772	7	+	39217009	39217149	3	1276	lincRNA	known
TCONS_00047347	XLOC_021772	7	+	39218464	39219209	4	1276	lincRNA	known
TCONS_00047350	XLOC_021772	7	+	39210649	39211417	1	1648	lincRNA	known
TCONS_00047350	XLOC_021772	7	+	39217009	39217149	2	1648	lincRNA	known
TCONS_00047350	XLOC_021772	7	+	39218472	39219209	3	1648	lincRNA	known
TCONS_00047349	XLOC_021772	7	+	39210649	39211417	1	1834	lincRNA	known
TCONS_00047349	XLOC_021772	7	+	39213144	39213254	2	1834	lincRNA	known
TCONS_00047349	XLOC_021772	7	+	39214206	39214280	3	1834	lincRNA	known
TCONS_00047349	XLOC_021772	7	+	39217009	39217149	4	1834	lincRNA	known
TCONS_00047349	XLOC_021772	7	+	39218472	39219209	5	1834	lincRNA	known
TCONS_00047348	XLOC_021772	7	+	39210649	39211417	1	1652	lincRNA	known
TCONS_00047348	XLOC_021772	7	+	39217009	39217149	2	1652	lincRNA	known
TCONS_00047348	XLOC_021772	7	+	39218468	39219209	3	1652	lincRNA	known
TCONS_00047534	XLOC_021846	7	+	52417145	52418080	1	2572	lincRNA	novel
TCONS_00047534	XLOC_021846	7	+	52424275	52425910	2	2572	lincRNA	novel
TCONS_00047603	XLOC_021880	7	+	57464535	57464867	1	1457	lincRNA	known
TCONS_00047603	XLOC_021880	7	+	57469599	57469642	2	1457	lincRNA	known
TCONS_00047603	XLOC_021880	7	+	57473955	57475034	3	1457	lincRNA	known
TCONS_00048294	XLOC_022190	7	+	110029437	110030073	1	2204	lincRNA	known
TCONS_00048294	XLOC_022190	7	+	110030436	110032002	2	2204	lincRNA	known
TCONS_00048361	XLOC_022218	7	+	122137417	122137783	1	1050	lincRNA	known
TCONS_00048361	XLOC_022218	7	+	122139587	122140269	2	1050	lincRNA	known
TCONS_00048430	XLOC_022260	7	+	130204943	130205033	1	788	lincRNA	known
TCONS_00048430	XLOC_022260	7	+	130213463	130213560	2	788	lincRNA	known
TCONS_00048430	XLOC_022260	7	+	130214023	130214621	3	788	lincRNA	known
TCONS_00048520	XLOC_022313	7	-	1753771	1754640	1	936	lincRNA	novel
TCONS_00048520	XLOC_022313	7	-	1756474	1756539	2	936	lincRNA	novel
TCONS_00048537	XLOC_022319	7	-	2415731	2415960	1	766	lincRNA	known
TCONS_00048537	XLOC_022319	7	-	2416107	2416283	2	766	lincRNA	known
TCONS_00048537	XLOC_022319	7	-	2429518	2429638	3	766	lincRNA	known
TCONS_00048537	XLOC_022319	7	-	2440317	2440554	4	766	lincRNA	known
TCONS_00048550	XLOC_022322	7	-	2558554	2558600	1	1317	lincRNA	known
TCONS_00048550	XLOC_022322	7	-	2560531	2560652	2	1317	lincRNA	known
TCONS_00048550	XLOC_022322	7	-	2562625	2563005	3	1317	lincRNA	known
TCONS_00048550	XLOC_022322	7	-	2564253	2565019	4	1317	lincRNA	known
TCONS_00048679	XLOC_022388	7	-	22478901	22478944	1	619	lincRNA	known
TCONS_00048679	XLOC_022388	7	-	22479792	22480366	2	619	lincRNA	known
TCONS_00048929	XLOC_022508	7	-	27581601	27582271	1	864	lincRNA	known
TCONS_00048929	XLOC_022508	7	-	27582371	27582563	2	864	lincRNA	known
TCONS_00049652	XLOC_022793	7	-	63765667	63766411	1	994	lincRNA	novel
TCONS_00049652	XLOC_022793	7	-	63771630	63771878	2	994	lincRNA	novel
TCONS_00049961	XLOC_022974	7	-	89873769	89875021	1	1549	lincRNA	known
TCONS_00049961	XLOC_022974	7	-	89912700	89912995	2	1549	lincRNA	known
TCONS_00049978	XLOC_022975	7	-	92004480	92004806	1	735	lincRNA	known
TCONS_00049978	XLOC_022975	7	-	92010319	92010371	2	735	lincRNA	known
TCONS_00049978	XLOC_022975	7	-	92015517	92015601	3	735	lincRNA	known
TCONS_00049978	XLOC_022975	7	-	92016172	92016240	4	735	lincRNA	known
TCONS_00049978	XLOC_022975	7	-	92018231	92018431	5	735	lincRNA	known
TCONS_00050189	XLOC_023055	7	-	109541365	109545035	1	3789	lincRNA	novel
TCONS_00050189	XLOC_023055	7	-	109545662	109545779	2	3789	lincRNA	novel
TCONS_00050292	XLOC_023096	7	-	122125228	122125302	1	385	lincRNA	novel
TCONS_00050292	XLOC_023096	7	-	122125925	122126234	2	385	lincRNA	novel
TCONS_00050759	XLOC_023399	8	+	4386788	4386964	1	282	lincRNA	novel
TCONS_00050759	XLOC_023399	8	+	4390744	4390848	2	282	lincRNA	novel
TCONS_00051022	XLOC_023518	8	+	49325787	49325981	1	1168	lincRNA	novel
TCONS_00051022	XLOC_023518	8	+	49338836	49339077	2	1168	lincRNA	novel
TCONS_00051022	XLOC_023518	8	+	49339437	49340167	3	1168	lincRNA	novel
TCONS_00051061	XLOC_023540	8	+	58176120	58176190	1	219	lincRNA	known
TCONS_00051061	XLOC_023540	8	+	58181783	58181930	2	219	lincRNA	known
TCONS_00051065	XLOC_023544	8	+	58642674	58642797	1	208	lincRNA	known
TCONS_00051065	XLOC_023544	8	+	58643885	58643968	2	208	lincRNA	known
TCONS_00051229	XLOC_023631	8	+	82262129	82262530	1	504	lincRNA	novel
TCONS_00051229	XLOC_023631	8	+	82282752	82282853	2	504	lincRNA	novel
TCONS_00051516	XLOC_023751	8	+	129327067	129327409	1	3341	lincRNA	novel
TCONS_00051516	XLOC_023751	8	+	129334795	129337792	2	3341	lincRNA	novel
TCONS_00051563	XLOC_023780	8	+	139880709	139880778	1	1678	lincRNA	novel
TCONS_00051563	XLOC_023780	8	+	139881282	139881489	2	1678	lincRNA	novel
TCONS_00051563	XLOC_023780	8	+	139883545	139884944	3	1678	lincRNA	novel
TCONS_00051625	XLOC_023796	8	+	144450647	144451654	1	1197	lincRNA	novel
TCONS_00051625	XLOC_023796	8	+	144453310	144453436	2	1197	lincRNA	novel
TCONS_00051625	XLOC_023796	8	+	144468076	144468137	3	1197	lincRNA	novel
TCONS_00051638	XLOC_023801	8	+	144716004	144716195	1	367	lincRNA	known
TCONS_00051638	XLOC_023801	8	+	144716333	144716481	2	367	lincRNA	known
TCONS_00051638	XLOC_023801	8	+	144718995	144719020	3	367	lincRNA	known
TCONS_00051640	XLOC_023801	8	+	144716020	144716195	1	746	lincRNA	known
TCONS_00051640	XLOC_023801	8	+	144716333	144716481	2	746	lincRNA	known
TCONS_00051640	XLOC_023801	8	+	144719451	144719519	3	746	lincRNA	known
TCONS_00051640	XLOC_023801	8	+	144721230	144721332	4	746	lincRNA	known
TCONS_00051640	XLOC_023801	8	+	144721555	144721694	5	746	lincRNA	known
TCONS_00051640	XLOC_023801	8	+	144722045	144722121	6	746	lincRNA	known
TCONS_00051640	XLOC_023801	8	+	144723154	144723185	7	746	lincRNA	known
TCONS_00051682	XLOC_023820	8	+	147814665	147814743	1	3633	lincRNA	known
TCONS_00051682	XLOC_023820	8	+	147815622	147819175	2	3633	lincRNA	known
TCONS_00051734	XLOC_023843	8	-	944511	944711	1	361	lincRNA	novel
TCONS_00051734	XLOC_023843	8	-	944814	944973	2	361	lincRNA	novel
TCONS_00051735	XLOC_023844	8	-	947051	947654	1	1454	lincRNA	known
TCONS_00051735	XLOC_023844	8	-	951563	952412	2	1454	lincRNA	known
TCONS_00051737	XLOC_023844	8	-	947051	947654	1	1232	lincRNA	known
TCONS_00051737	XLOC_023844	8	-	951794	952421	2	1232	lincRNA	known
TCONS_00051736	XLOC_023844	8	-	947051	947654	1	1448	lincRNA	known
TCONS_00051736	XLOC_023844	8	-	947751	947966	2	1448	lincRNA	known
TCONS_00051736	XLOC_023844	8	-	951794	952421	3	1448	lincRNA	known
TCONS_00051738	XLOC_023844	8	-	949231	949275	1	609	lincRNA	known
TCONS_00051738	XLOC_023844	8	-	951794	952357	2	609	lincRNA	known
TCONS_00051762	XLOC_023853	8	-	2040558	2041324	1	1090	lincRNA	novel
TCONS_00051762	XLOC_023853	8	-	2042492	2042814	2	1090	lincRNA	novel
TCONS_00051778	XLOC_023863	8	-	3465661	3466038	1	620	lincRNA	known
TCONS_00051778	XLOC_023863	8	-	3469089	3469159	2	620	lincRNA	known
TCONS_00051778	XLOC_023863	8	-	3469539	3469709	3	620	lincRNA	known
TCONS_00051777	XLOC_023863	8	-	3465661	3466038	1	549	lincRNA	known
TCONS_00051777	XLOC_023863	8	-	3469539	3469709	2	549	lincRNA	known
TCONS_00051880	XLOC_023911	8	-	20844249	20844767	1	725	lincRNA	known
TCONS_00051880	XLOC_023911	8	-	20845572	20845709	2	725	lincRNA	known
TCONS_00051880	XLOC_023911	8	-	20845833	20845900	3	725	lincRNA	known
TCONS_00051892	XLOC_023918	8	-	31319095	31319834	1	869	lincRNA	known
TCONS_00051892	XLOC_023918	8	-	31474913	31475041	2	869	lincRNA	known
TCONS_00051962	XLOC_023953	8	-	40259442	40259806	1	467	lincRNA	novel
TCONS_00051962	XLOC_023953	8	-	40275076	40275177	2	467	lincRNA	novel
TCONS_00052075	XLOC_024003	8	-	57414670	57415474	1	1318	lincRNA	known
TCONS_00052075	XLOC_024003	8	-	57416840	57417352	2	1318	lincRNA	known
TCONS_00052119	XLOC_024018	8	-	58770062	58774860	1	5652	lincRNA	known
TCONS_00052119	XLOC_024018	8	-	58774987	58775839	2	5652	lincRNA	known
TCONS_00052182	XLOC_024061	8	-	73273954	73275053	1	1171	lincRNA	novel
TCONS_00052182	XLOC_024061	8	-	73279299	73279369	2	1171	lincRNA	novel
TCONS_00052183	XLOC_024061	8	-	73273954	73275053	1	1571	lincRNA	known
TCONS_00052183	XLOC_024061	8	-	73276971	73277255	2	1571	lincRNA	known
TCONS_00052183	XLOC_024061	8	-	73279299	73279463	3	1571	lincRNA	known
TCONS_00052183	XLOC_024061	8	-	73285587	73285607	4	1571	lincRNA	known
TCONS_00052198	XLOC_024067	8	-	74840307	74840357	1	502	lincRNA	novel
TCONS_00052198	XLOC_024067	8	-	74846359	74846809	2	502	lincRNA	novel
TCONS_00052199	XLOC_024067	8	-	74840307	74840357	1	1114	lincRNA	known
TCONS_00052199	XLOC_024067	8	-	74845919	74846981	2	1114	lincRNA	known
TCONS_00052201	XLOC_024069	8	-	75349980	75351378	1	3971	lincRNA	known
TCONS_00052201	XLOC_024069	8	-	75351507	75354078	2	3971	lincRNA	known
TCONS_00052331	XLOC_024136	8	-	93049161	93050649	1	1513	lincRNA	known
TCONS_00052331	XLOC_024136	8	-	93051605	93051628	2	1513	lincRNA	known
TCONS_00052333	XLOC_024136	8	-	93049161	93051089	1	2236	lincRNA	known
TCONS_00052333	XLOC_024136	8	-	93051605	93051665	2	2236	lincRNA	known
TCONS_00052333	XLOC_024136	8	-	93054291	93054388	3	2236	lincRNA	known
TCONS_00052333	XLOC_024136	8	-	93057088	93057148	4	2236	lincRNA	known
TCONS_00052333	XLOC_024136	8	-	93057574	93057639	5	2236	lincRNA	known
TCONS_00052333	XLOC_024136	8	-	93057751	93057771	6	2236	lincRNA	known
TCONS_00052335	XLOC_024136	8	-	93052791	93053357	1	1001	lincRNA	known
TCONS_00052335	XLOC_024136	8	-	93054000	93054146	2	1001	lincRNA	known
TCONS_00052335	XLOC_024136	8	-	93054291	93054388	3	1001	lincRNA	known
TCONS_00052335	XLOC_024136	8	-	93054485	93054673	4	1001	lincRNA	known
TCONS_00052334	XLOC_024136	8	-	93052791	93053357	1	1006	lincRNA	known
TCONS_00052334	XLOC_024136	8	-	93054000	93054146	2	1006	lincRNA	known
TCONS_00052334	XLOC_024136	8	-	93054291	93054388	3	1006	lincRNA	known
TCONS_00052334	XLOC_024136	8	-	93054480	93054673	4	1006	lincRNA	known
TCONS_00052336	XLOC_024136	8	-	93052791	93053357	1	949	lincRNA	known
TCONS_00052336	XLOC_024136	8	-	93054000	93054146	2	949	lincRNA	known
TCONS_00052336	XLOC_024136	8	-	93054291	93054388	3	949	lincRNA	known
TCONS_00052336	XLOC_024136	8	-	93054539	93054675	4	949	lincRNA	known
TCONS_00052337	XLOC_024137	8	-	93076103	93077080	1	1473	lincRNA	novel
TCONS_00052337	XLOC_024137	8	-	93090375	93090547	2	1473	lincRNA	novel
TCONS_00052337	XLOC_024137	8	-	93091197	93091518	3	1473	lincRNA	novel
TCONS_00052415	XLOC_024166	8	-	111508055	111508532	1	635	lincRNA	novel
TCONS_00052415	XLOC_024166	8	-	111512224	111512380	2	635	lincRNA	novel
TCONS_00052466	XLOC_024183	8	-	119368094	119368876	1	1149	lincRNA	novel
TCONS_00052466	XLOC_024183	8	-	119373168	119373472	2	1149	lincRNA	novel
TCONS_00052466	XLOC_024183	8	-	119373752	119373812	3	1149	lincRNA	novel
TCONS_00052465	XLOC_024183	8	-	119368094	119368876	1	1200	lincRNA	known
TCONS_00052465	XLOC_024183	8	-	119372261	119372311	2	1200	lincRNA	known
TCONS_00052465	XLOC_024183	8	-	119373168	119373472	3	1200	lincRNA	known
TCONS_00052465	XLOC_024183	8	-	119373752	119373812	4	1200	lincRNA	known
TCONS_00052467	XLOC_024183	8	-	119368094	119368876	1	1114	lincRNA	novel
TCONS_00052467	XLOC_024183	8	-	119373168	119373472	2	1114	lincRNA	novel
TCONS_00052467	XLOC_024183	8	-	119373919	119373944	3	1114	lincRNA	novel
TCONS_00052468	XLOC_024184	8	-	119777893	119778864	1	1016	lincRNA	novel
TCONS_00052468	XLOC_024184	8	-	119779301	119779344	2	1016	lincRNA	novel
TCONS_00052469	XLOC_024185	8	-	119844809	119845120	1	743	lincRNA	novel
TCONS_00052469	XLOC_024185	8	-	119848777	119848872	2	743	lincRNA	novel
TCONS_00052469	XLOC_024185	8	-	119909810	119910144	3	743	lincRNA	novel
TCONS_00052551	XLOC_024220	8	-	128457020	128458744	1	1890	lincRNA	known
TCONS_00052551	XLOC_024220	8	-	128460303	128460443	2	1890	lincRNA	known
TCONS_00052551	XLOC_024220	8	-	128460919	128460942	3	1890	lincRNA	known
TCONS_00052552	XLOC_024220	8	-	128457020	128459940	1	3290	lincRNA	known
TCONS_00052552	XLOC_024220	8	-	128460303	128460443	2	3290	lincRNA	known
TCONS_00052552	XLOC_024220	8	-	128460730	128460957	3	3290	lincRNA	known
TCONS_00052553	XLOC_024220	8	-	128457020	128458744	1	2099	lincRNA	known
TCONS_00052553	XLOC_024220	8	-	128460303	128460443	2	2099	lincRNA	known
TCONS_00052553	XLOC_024220	8	-	128460730	128460962	3	2099	lincRNA	known
TCONS_00052646	XLOC_024264	8	-	144133214	144134882	1	1802	lincRNA	known
TCONS_00052646	XLOC_024264	8	-	144174952	144175084	2	1802	lincRNA	known
TCONS_00053025	XLOC_024530	9	+	7967710	7967823	1	948	lincRNA	novel
TCONS_00053025	XLOC_024530	9	+	7967965	7968798	2	948	lincRNA	novel
TCONS_00053038	XLOC_024537	9	+	8901964	8902239	1	351	lincRNA	novel
TCONS_00053038	XLOC_024537	9	+	8916907	8916981	2	351	lincRNA	novel
TCONS_00053039	XLOC_024537	9	+	8901985	8902239	1	308	lincRNA	novel
TCONS_00053039	XLOC_024537	9	+	8916929	8916981	2	308	lincRNA	novel
TCONS_00053051	XLOC_024543	9	+	9634418	9634660	1	2598	lincRNA	known
TCONS_00053051	XLOC_024543	9	+	9646216	9648570	2	2598	lincRNA	known
TCONS_00053050	XLOC_024543	9	+	9634418	9634660	1	2315	lincRNA	known
TCONS_00053050	XLOC_024543	9	+	9646216	9646748	2	2315	lincRNA	known
TCONS_00053050	XLOC_024543	9	+	9647032	9648570	3	2315	lincRNA	known
TCONS_00053053	XLOC_024543	9	+	9634528	9634660	1	2390	lincRNA	known
TCONS_00053053	XLOC_024543	9	+	9646314	9648570	2	2390	lincRNA	known
TCONS_00053084	XLOC_024559	9	+	10966804	10966954	1	228	lincRNA	known
TCONS_00053084	XLOC_024559	9	+	10971204	10971280	2	228	lincRNA	known
TCONS_00053829	XLOC_024908	9	+	80834010	80834235	1	1950	lincRNA	known
TCONS_00053829	XLOC_024908	9	+	80862340	80862452	2	1950	lincRNA	known
TCONS_00053829	XLOC_024908	9	+	80952466	80952645	3	1950	lincRNA	known
TCONS_00053829	XLOC_024908	9	+	80972098	80972204	4	1950	lincRNA	known
TCONS_00053829	XLOC_024908	9	+	80991428	80992751	5	1950	lincRNA	known
TCONS_00053831	XLOC_024908	9	+	80834050	80834235	1	2019	lincRNA	known
TCONS_00053831	XLOC_024908	9	+	80862340	80862452	2	2019	lincRNA	known
TCONS_00053831	XLOC_024908	9	+	80952466	80952645	3	2019	lincRNA	known
TCONS_00053831	XLOC_024908	9	+	80966805	80966913	4	2019	lincRNA	known
TCONS_00053831	XLOC_024908	9	+	80972098	80972204	5	2019	lincRNA	known
TCONS_00053831	XLOC_024908	9	+	80991428	80992751	6	2019	lincRNA	known
TCONS_00053830	XLOC_024908	9	+	80834050	80834235	1	1803	lincRNA	known
TCONS_00053830	XLOC_024908	9	+	80862340	80862452	2	1803	lincRNA	known
TCONS_00053830	XLOC_024908	9	+	80952466	80952645	3	1803	lincRNA	known
TCONS_00053830	XLOC_024908	9	+	80991428	80992751	4	1803	lincRNA	known
TCONS_00053832	XLOC_024908	9	+	80834055	80834235	1	933	lincRNA	known
TCONS_00053832	XLOC_024908	9	+	80862340	80862452	2	933	lincRNA	known
TCONS_00053832	XLOC_024908	9	+	80952466	80952645	3	933	lincRNA	known
TCONS_00053832	XLOC_024908	9	+	80972098	80972204	4	933	lincRNA	known
TCONS_00053832	XLOC_024908	9	+	80972808	80972930	5	933	lincRNA	known
TCONS_00053832	XLOC_024908	9	+	80977811	80977861	6	933	lincRNA	known
TCONS_00053832	XLOC_024908	9	+	80988840	80988983	7	933	lincRNA	known
TCONS_00053832	XLOC_024908	9	+	80991394	80991427	8	933	lincRNA	known
TCONS_00053833	XLOC_024908	9	+	80834055	80834235	1	2172	lincRNA	known
TCONS_00053833	XLOC_024908	9	+	80862340	80862452	2	2172	lincRNA	known
TCONS_00053833	XLOC_024908	9	+	80952466	80952645	3	2172	lincRNA	known
TCONS_00053833	XLOC_024908	9	+	80972098	80972204	4	2172	lincRNA	known
TCONS_00053833	XLOC_024908	9	+	80972808	80972930	5	2172	lincRNA	known
TCONS_00053833	XLOC_024908	9	+	80988840	80988983	6	2172	lincRNA	known
TCONS_00053833	XLOC_024908	9	+	80991428	80992751	7	2172	lincRNA	known
TCONS_00053836	XLOC_024908	9	+	80834061	80834235	1	2192	lincRNA	known
TCONS_00053836	XLOC_024908	9	+	80845303	80845486	2	2192	lincRNA	known
TCONS_00053836	XLOC_024908	9	+	80862340	80862452	3	2192	lincRNA	known
TCONS_00053836	XLOC_024908	9	+	80952466	80952645	4	2192	lincRNA	known
TCONS_00053836	XLOC_024908	9	+	80966805	80966913	5	2192	lincRNA	known
TCONS_00053836	XLOC_024908	9	+	80972098	80972204	6	2192	lincRNA	known
TCONS_00053836	XLOC_024908	9	+	80991428	80992751	7	2192	lincRNA	known
TCONS_00053835	XLOC_024908	9	+	80834061	80834235	1	2083	lincRNA	novel
TCONS_00053835	XLOC_024908	9	+	80845303	80845486	2	2083	lincRNA	novel
TCONS_00053835	XLOC_024908	9	+	80862340	80862452	3	2083	lincRNA	novel
TCONS_00053835	XLOC_024908	9	+	80952466	80952645	4	2083	lincRNA	novel
TCONS_00053835	XLOC_024908	9	+	80972098	80972204	5	2083	lincRNA	novel
TCONS_00053835	XLOC_024908	9	+	80991428	80992751	6	2083	lincRNA	novel
TCONS_00053834	XLOC_024908	9	+	80834061	80834235	1	1976	lincRNA	novel
TCONS_00053834	XLOC_024908	9	+	80845303	80845486	2	1976	lincRNA	novel
TCONS_00053834	XLOC_024908	9	+	80862340	80862452	3	1976	lincRNA	novel
TCONS_00053834	XLOC_024908	9	+	80952466	80952645	4	1976	lincRNA	novel
TCONS_00053834	XLOC_024908	9	+	80991428	80992751	5	1976	lincRNA	novel
TCONS_00053837	XLOC_024908	9	+	80834062	80834235	1	692	lincRNA	novel
TCONS_00053837	XLOC_024908	9	+	80845303	80845486	2	692	lincRNA	novel
TCONS_00053837	XLOC_024908	9	+	80862340	80862452	3	692	lincRNA	novel
TCONS_00053837	XLOC_024908	9	+	80952466	80952645	4	692	lincRNA	novel
TCONS_00053837	XLOC_024908	9	+	80961437	80961477	5	692	lincRNA	novel
TCONS_00053873	XLOC_024925	9	+	85564831	85565048	1	435	lincRNA	known
TCONS_00053873	XLOC_024925	9	+	85595100	85595199	2	435	lincRNA	known
TCONS_00053873	XLOC_024925	9	+	85611277	85611393	3	435	lincRNA	known
TCONS_00054049	XLOC_025012	9	+	117432682	117432807	1	853	lincRNA	novel
TCONS_00054049	XLOC_025012	9	+	117432909	117433635	2	853	lincRNA	novel
TCONS_00054067	XLOC_025024	9	+	119048754	119048807	1	2090	lincRNA	novel
TCONS_00054067	XLOC_025024	9	+	119053631	119055666	2	2090	lincRNA	novel
TCONS_00054345	XLOC_025136	9	+	146295893	146295918	1	743	lincRNA	novel
TCONS_00054345	XLOC_025136	9	+	146296349	146296546	2	743	lincRNA	novel
TCONS_00054345	XLOC_025136	9	+	146297909	146297976	3	743	lincRNA	novel
TCONS_00054345	XLOC_025136	9	+	146298630	146299080	4	743	lincRNA	novel
TCONS_00054655	XLOC_025332	9	-	10099078	10100533	1	2782	lincRNA	novel
TCONS_00054655	XLOC_025332	9	-	10106165	10107490	2	2782	lincRNA	novel
TCONS_00054679	XLOC_025349	9	-	11726958	11727013	1	446	lincRNA	novel
TCONS_00054679	XLOC_025349	9	-	11731333	11731722	2	446	lincRNA	novel
TCONS_00054934	XLOC_025448	9	-	40836621	40837267	1	813	lincRNA	known
TCONS_00054934	XLOC_025448	9	-	40837527	40837692	2	813	lincRNA	known
TCONS_00054949	XLOC_025456	9	-	43028407	43028668	1	529	lincRNA	known
TCONS_00054949	XLOC_025456	9	-	43030233	43030287	2	529	lincRNA	known
TCONS_00054949	XLOC_025456	9	-	43033759	43033878	3	529	lincRNA	known
TCONS_00054949	XLOC_025456	9	-	43047664	43047755	4	529	lincRNA	known
TCONS_00054950	XLOC_025456	9	-	43028407	43028538	1	631	lincRNA	known
TCONS_00054950	XLOC_025456	9	-	43030233	43030287	2	631	lincRNA	known
TCONS_00054950	XLOC_025456	9	-	43033759	43033878	3	631	lincRNA	known
TCONS_00054950	XLOC_025456	9	-	43050776	43050877	4	631	lincRNA	known
TCONS_00054950	XLOC_025456	9	-	43055408	43055529	5	631	lincRNA	known
TCONS_00054950	XLOC_025456	9	-	43057277	43057376	6	631	lincRNA	known
TCONS_00054951	XLOC_025456	9	-	43028407	43028538	1	707	lincRNA	known
TCONS_00054951	XLOC_025456	9	-	43030233	43030287	2	707	lincRNA	known
TCONS_00054951	XLOC_025456	9	-	43033759	43033878	3	707	lincRNA	known
TCONS_00054951	XLOC_025456	9	-	43047664	43047762	4	707	lincRNA	known
TCONS_00054951	XLOC_025456	9	-	43050776	43050877	5	707	lincRNA	known
TCONS_00054951	XLOC_025456	9	-	43055408	43055529	6	707	lincRNA	known
TCONS_00054951	XLOC_025456	9	-	43138824	43138900	7	707	lincRNA	known
TCONS_00054999	XLOC_025478	9	-	46439765	46440773	1	1134	lincRNA	known
TCONS_00054999	XLOC_025478	9	-	46451118	46451186	2	1134	lincRNA	known
TCONS_00054999	XLOC_025478	9	-	46454253	46454308	3	1134	lincRNA	known
TCONS_00055000	XLOC_025478	9	-	46439765	46440773	1	2304	lincRNA	known
TCONS_00055000	XLOC_025478	9	-	46451118	46451186	2	2304	lincRNA	known
TCONS_00055000	XLOC_025478	9	-	46453127	46454352	3	2304	lincRNA	known
TCONS_00055002	XLOC_025478	9	-	46448387	46449269	1	2178	lincRNA	known
TCONS_00055002	XLOC_025478	9	-	46451118	46451186	2	2178	lincRNA	known
TCONS_00055002	XLOC_025478	9	-	46453127	46454352	3	2178	lincRNA	known
TCONS_00055005	XLOC_025480	9	-	46852430	46856738	1	5301	lincRNA	known
TCONS_00055005	XLOC_025480	9	-	46857944	46858084	2	5301	lincRNA	known
TCONS_00055005	XLOC_025480	9	-	46861375	46861574	3	5301	lincRNA	known
TCONS_00055005	XLOC_025480	9	-	46874739	46874828	4	5301	lincRNA	known
TCONS_00055005	XLOC_025480	9	-	46875539	46875593	5	5301	lincRNA	known
TCONS_00055005	XLOC_025480	9	-	46880152	46880657	6	5301	lincRNA	known
TCONS_00055004	XLOC_025480	9	-	46852430	46856757	1	5295	lincRNA	known
TCONS_00055004	XLOC_025480	9	-	46857944	46858084	2	5295	lincRNA	known
TCONS_00055004	XLOC_025480	9	-	46861375	46861574	3	5295	lincRNA	known
TCONS_00055004	XLOC_025480	9	-	46874764	46874828	4	5295	lincRNA	known
TCONS_00055004	XLOC_025480	9	-	46875539	46875593	5	5295	lincRNA	known
TCONS_00055004	XLOC_025480	9	-	46880152	46880657	6	5295	lincRNA	known
TCONS_00055014	XLOC_025485	9	-	47770346	47771324	1	1750	lincRNA	novel
TCONS_00055014	XLOC_025485	9	-	47771483	47772253	2	1750	lincRNA	novel
TCONS_00055484	XLOC_025688	9	-	85614715	85614837	1	501	lincRNA	novel
TCONS_00055484	XLOC_025688	9	-	85615610	85615640	2	501	lincRNA	novel
TCONS_00055484	XLOC_025688	9	-	85639841	85639931	3	501	lincRNA	novel
TCONS_00055484	XLOC_025688	9	-	85670406	85670661	4	501	lincRNA	novel
TCONS_00055568	XLOC_025723	9	-	101838281	101838389	1	315	lincRNA	novel
TCONS_00055568	XLOC_025723	9	-	101839946	101840151	2	315	lincRNA	novel
TCONS_00055608	XLOC_025741	9	-	112720224	112720251	1	773	lincRNA	known
TCONS_00055608	XLOC_025741	9	-	112722247	112722991	2	773	lincRNA	known
TCONS_00055654	XLOC_025760	9	-	116635576	116643989	1	9355	lincRNA	known
TCONS_00055654	XLOC_025760	9	-	116644521	116645461	2	9355	lincRNA	known
TCONS_00055659	XLOC_025763	9	-	116982824	116982919	1	482	lincRNA	novel
TCONS_00055659	XLOC_025763	9	-	117054464	117054849	2	482	lincRNA	novel
TCONS_00055660	XLOC_025763	9	-	117004820	117006675	1	2242	lincRNA	novel
TCONS_00055660	XLOC_025763	9	-	117054464	117054849	2	2242	lincRNA	novel
TCONS_00055692	XLOC_025777	9	-	119353260	119353307	1	314	lincRNA	novel
TCONS_00055692	XLOC_025777	9	-	119354014	119354279	2	314	lincRNA	novel
TCONS_00055745	XLOC_025810	9	-	125653992	125654600	1	803	lincRNA	known
TCONS_00055745	XLOC_025810	9	-	125666064	125666257	2	803	lincRNA	known
TCONS_00055822	XLOC_025856	9	-	134731685	134731939	1	806	lincRNA	known
TCONS_00055822	XLOC_025856	9	-	134732334	134732453	2	806	lincRNA	known
TCONS_00055822	XLOC_025856	9	-	134732735	134733029	3	806	lincRNA	known
TCONS_00055822	XLOC_025856	9	-	134733785	134733920	4	806	lincRNA	known
TCONS_00055825	XLOC_025859	9	-	135777241	135777403	1	1475	lincRNA	novel
TCONS_00055825	XLOC_025859	9	-	135783722	135784665	2	1475	lincRNA	novel
TCONS_00055825	XLOC_025859	9	-	135786469	135786836	3	1475	lincRNA	novel
TCONS_00055853	XLOC_025873	9	-	137759035	137760865	1	1900	lincRNA	known
TCONS_00055853	XLOC_025873	9	-	137769912	137769980	2	1900	lincRNA	known
TCONS_00055906	XLOC_025896	9	-	143379753	143379976	1	580	lincRNA	known
TCONS_00055906	XLOC_025896	9	-	143380354	143380709	2	580	lincRNA	known
TCONS_00055958	XLOC_025922	9	-	148516313	148517426	1	1501	lincRNA	novel
TCONS_00055958	XLOC_025922	9	-	148517533	148517919	2	1501	lincRNA	novel
TCONS_00055959	XLOC_025923	9	-	148558802	148561115	1	2414	lincRNA	known
TCONS_00055959	XLOC_025923	9	-	148567341	148567401	2	2414	lincRNA	known
TCONS_00055959	XLOC_025923	9	-	148568244	148568282	3	2414	lincRNA	known
TCONS_00055961	XLOC_025923	9	-	148558802	148561115	1	2529	lincRNA	known
TCONS_00055961	XLOC_025923	9	-	148566736	148566779	2	2529	lincRNA	known
TCONS_00055961	XLOC_025923	9	-	148567341	148567404	3	2529	lincRNA	known
TCONS_00055961	XLOC_025923	9	-	148568244	148568350	4	2529	lincRNA	known
TCONS_00055960	XLOC_025923	9	-	148558802	148561115	1	2485	lincRNA	known
TCONS_00055960	XLOC_025923	9	-	148567341	148567404	2	2485	lincRNA	known
TCONS_00055960	XLOC_025923	9	-	148568244	148568350	3	2485	lincRNA	known
TCONS_00056305	XLOC_026232	GL892353.1	-	16498	17231	1	840	lincRNA	novel
TCONS_00056305	XLOC_026232	GL892353.1	-	22319	22424	2	840	lincRNA	novel
TCONS_00056336	XLOC_026252	GL892387.1	-	706	800	1	328	lincRNA	novel
TCONS_00056336	XLOC_026252	GL892387.1	-	1467	1699	2	328	lincRNA	novel
TCONS_00056565	XLOC_026412	GL892730.2	+	105350	105423	1	592	lincRNA	novel
TCONS_00056565	XLOC_026412	GL892730.2	+	113120	113270	2	592	lincRNA	novel
TCONS_00056565	XLOC_026412	GL892730.2	+	124702	124825	3	592	lincRNA	novel
TCONS_00056565	XLOC_026412	GL892730.2	+	189452	189575	4	592	lincRNA	novel
TCONS_00056565	XLOC_026412	GL892730.2	+	209273	209391	5	592	lincRNA	novel
TCONS_00056581	XLOC_026426	GL892761.1	-	18233	19062	1	929	lincRNA	novel
TCONS_00056581	XLOC_026426	GL892761.1	-	19474	19572	2	929	lincRNA	novel
TCONS_00056646	XLOC_026456	GL892805.1	+	103574	104940	1	4028	lincRNA	novel
TCONS_00056646	XLOC_026456	GL892805.1	+	105049	107709	2	4028	lincRNA	novel
TCONS_00056770	XLOC_026533	GL892917.1	+	4314	4778	1	815	lincRNA	novel
TCONS_00056770	XLOC_026533	GL892917.1	+	9240	9589	2	815	lincRNA	novel
TCONS_00056915	XLOC_026633	GL893088.1	+	80541	80852	1	617	lincRNA	novel
TCONS_00056915	XLOC_026633	GL893088.1	+	81025	81329	2	617	lincRNA	novel
TCONS_00056971	XLOC_026676	GL893142.1	+	38496	38610	1	302	lincRNA	novel
TCONS_00056971	XLOC_026676	GL893142.1	+	43898	43981	2	302	lincRNA	novel
TCONS_00056971	XLOC_026676	GL893142.1	+	45276	45378	3	302	lincRNA	novel
TCONS_00057053	XLOC_026738	GL893220.1	+	19659	20278	1	1367	lincRNA	novel
TCONS_00057053	XLOC_026738	GL893220.1	+	20407	21153	2	1367	lincRNA	novel
TCONS_00057132	XLOC_026785	GL893285.2	-	19550	20011	1	1525	lincRNA	novel
TCONS_00057132	XLOC_026785	GL893285.2	-	20069	21131	2	1525	lincRNA	novel
TCONS_00057401	XLOC_026962	GL893553.2	-	40887	42449	1	1677	lincRNA	novel
TCONS_00057401	XLOC_026962	GL893553.2	-	42681	42794	2	1677	lincRNA	novel
TCONS_00057403	XLOC_026962	GL893553.2	-	40887	42449	1	1771	lincRNA	novel
TCONS_00057403	XLOC_026962	GL893553.2	-	43245	43277	2	1771	lincRNA	novel
TCONS_00057403	XLOC_026962	GL893553.2	-	45877	46051	3	1771	lincRNA	novel
TCONS_00057531	XLOC_027037	GL893660.1	-	3652	4325	1	758	lincRNA	novel
TCONS_00057531	XLOC_027037	GL893660.1	-	4551	4634	2	758	lincRNA	novel
TCONS_00057625	XLOC_027093	GL893717.1	-	16760	16824	1	705	lincRNA	novel
TCONS_00057625	XLOC_027093	GL893717.1	-	17068	17636	2	705	lincRNA	novel
TCONS_00057625	XLOC_027093	GL893717.1	-	20463	20533	3	705	lincRNA	novel
TCONS_00057682	XLOC_027134	GL893763.1	-	18444	19304	1	1015	lincRNA	novel
TCONS_00057682	XLOC_027134	GL893763.1	-	19545	19613	2	1015	lincRNA	novel
TCONS_00057682	XLOC_027134	GL893763.1	-	20997	21081	3	1015	lincRNA	novel
TCONS_00057756	XLOC_027181	GL893841.1	-	69114	69147	1	551	lincRNA	known
TCONS_00057756	XLOC_027181	GL893841.1	-	70907	71098	2	551	lincRNA	known
TCONS_00057756	XLOC_027181	GL893841.1	-	74050	74374	3	551	lincRNA	known
TCONS_00057792	XLOC_027202	GL893871.1	+	18927	19144	1	1127	lincRNA	known
TCONS_00057792	XLOC_027202	GL893871.1	+	19306	19424	2	1127	lincRNA	known
TCONS_00057792	XLOC_027202	GL893871.1	+	39925	40714	3	1127	lincRNA	known
[truncated: 186 more rows]

## Sheet: Table S2
Table S2: DELs between the WH group and the YY group
transcript_id	gene_id	position	normalized_FPKM_WH	normalized_FPKM_YY	log2(FPKM_YY/FPKM_WH)	p_value	significant	up/down
TCONS_00000089	XLOC_000042	1:10542660-10549604	0.118024	0.797748	2.75685	5e-05	yes	down
TCONS_00000134	XLOC_000060	1:17164251-17171287	1.28821	0.063132	-4.35085	5e-05	yes	up
TCONS_00000742	XLOC_000321	1:117532009-117627932	16.247	30.8426	0.924754	0.0005	yes	down
TCONS_00001723	XLOC_000769	1:227953144-227982358	0	0.824745	inf	5e-05	yes	down
TCONS_00001726	XLOC_000769	1:227953144-227982358	0	5.42591	inf	5e-05	yes	down
TCONS_00004483	XLOC_001953	1:232550269-232639535	1.29336	0	-inf	5e-05	yes	up
TCONS_00005771	XLOC_002761	10:13135509-13143772	1.61626	0.466647	-1.79225	0.0001	yes	up
TCONS_00006963	XLOC_003265	10:62380702-62385327	2.42237	0.491371	-2.30154	0.00145	yes	up
TCONS_00007096	XLOC_003317	10:78895907-79054674	1.7986	0	-inf	5e-05	yes	up
TCONS_00007946	XLOC_003754	11:18740114-18860384	1.97915	7.38398	1.89952	5e-05	yes	down
TCONS_00010182	XLOC_004765	12:19615880-19621932	0.569422	0	-inf	5e-05	yes	up
TCONS_00013076	XLOC_006072	13:207272048-207305670	0.622037	1.52898	1.2975	0.0008	yes	down
TCONS_00016783	XLOC_007760	14:107323551-107339809	0.600695	0	-inf	5e-05	yes	up
TCONS_00021480	XLOC_009713	15:133852497-133856393	1.73595	11.0881	2.67521	5e-05	yes	down
TCONS_00021915	XLOC_010023	16:7176778-7184128	1.90451	0.388453	-2.29361	5e-05	yes	up
TCONS_00024626	XLOC_011279	17:69254965-69257355	0.901516	0.0544417	-4.04957	0.0014	yes	up
TCONS_00025157	XLOC_011564	18:50118938-50138407	1.30464	0	-inf	0.0008	yes	up
TCONS_00030501	XLOC_013985	2:124472320-124543226	0.852871	0	-inf	5e-05	yes	up
TCONS_00034774	XLOC_015946	3:133090993-133094005	2.71109	0.356262	-2.92787	5e-05	yes	up
TCONS_00043130	XLOC_019873	6:77154599-77163354	4.12847	0	-inf	5e-05	yes	up
TCONS_00044733	XLOC_020564	6:48908762-48915484	1.175	0.0998624	-3.55657	0.00015	yes	up
TCONS_00045915	XLOC_021052	6:105182478-105204101	2.47081	0	-inf	0.0002	yes	up
TCONS_00051777	XLOC_023863	8:3465660-3469709	0	8.78844	inf	5e-05	yes	down
TCONS_00051778	XLOC_023863	8:3465660-3469709	0	3.47631	inf	5e-05	yes	down
TCONS_00056305	XLOC_026232	GL892353.1:16497-22424	0.452155	2.15888	2.2554	0.00135	yes	down
TCONS_00059011	XLOC_028042	GL895129.1:0-2349	1172.25	2520.99	1.10471	0.00035	yes	down
TCONS_00061360	XLOC_029610	JH118694.1:27154-28276	1.9253	0.540033	-1.83396	0.00105	yes	up
TCONS_00061633	XLOC_029782	JH118856.1:46393-56516	18.5669	48.5976	1.38815	5e-05	yes	down
TCONS_00061825	XLOC_029920	JH118968.1:86705-100127	1.68879	0	-inf	5e-05	yes	up
TCONS_00064940	XLOC_030923	X:85330492-85561967	0.438733	8.16997	4.21892	0.0002	yes	down

## Sheet: Table S3
Table S3: Gene ontology and pathway analysis of DEGs
Category	Term	Count	%	PValue	Genes
GOTERM_BP_FAT	GO:0006006~glucose metabolic process	27	6.04027	1.04493e-14	ENSG00000158571, ENSG00000067177, ENSG00000167244, ENSG00000111669, ENSG00000146701, ENSG00000137700, ENSG00000154330, ENSG00000004799, ENSG00000067225, ENSG00000134333, ENSG00000114480, ENSG00000132825, ENSG00000102144, ENSG00000152256, ENSG00000128272, ENSG00000105220, ENSG00000079739, ENSG00000135447, ENSG00000115159, ENSG00000164708, ENSG00000162772, ENSG00000187486, ENSG00000164776, ENSG0000…
GOTERM_BP_FAT	GO:0019318~hexose metabolic process	29	6.4877	5.27776e-14	ENSG00000158571, ENSG00000167244, ENSG00000067177, ENSG00000111669, ENSG00000146701, ENSG00000137700, ENSG00000154330, ENSG00000004799, ENSG00000067225, ENSG00000134333, ENSG00000114480, ENSG00000132825, ENSG00000102144, ENSG00000152256, ENSG00000128272, ENSG00000105220, ENSG00000079739, ENSG00000112893, ENSG00000135447, ENSG00000115159, ENSG00000164708, ENSG00000162772, ENSG00000187486, ENSG0000…
GOTERM_BP_FAT	GO:0005996~monosaccharide metabolic process	29	6.4877	2.07356e-12	ENSG00000158571, ENSG00000167244, ENSG00000067177, ENSG00000111669, ENSG00000146701, ENSG00000137700, ENSG00000154330, ENSG00000004799, ENSG00000067225, ENSG00000134333, ENSG00000114480, ENSG00000132825, ENSG00000102144, ENSG00000152256, ENSG00000128272, ENSG00000105220, ENSG00000079739, ENSG00000112893, ENSG00000135447, ENSG00000115159, ENSG00000164708, ENSG00000162772, ENSG00000187486, ENSG0000…
GOTERM_BP_FAT	GO:0006090~pyruvate metabolic process	13	2.90828	3.14677e-10	ENSG00000158571, ENSG00000111669, ENSG00000115159, ENSG00000164708, ENSG00000162772, ENSG00000151376, ENSG00000134333, ENSG00000155380, ENSG00000141526, ENSG00000128272, ENSG00000105220, ENSG00000079739, ENSG00000111716
GOTERM_BP_FAT	GO:0006096~glycolysis	11	2.46085	2.10806e-07	ENSG00000158571, ENSG00000141959, ENSG00000134333, ENSG00000111669, ENSG00000164708, ENSG00000102144, ENSG00000146701, ENSG00000105220, ENSG00000067225, ENSG00000079739, ENSG00000111716
GOTERM_BP_FAT	GO:0019320~hexose catabolic process	12	2.68456	1.12909e-06	ENSG00000158571, ENSG00000141959, ENSG00000134333, ENSG00000176920, ENSG00000111669, ENSG00000164708, ENSG00000102144, ENSG00000146701, ENSG00000105220, ENSG00000067225, ENSG00000079739, ENSG00000111716
GOTERM_BP_FAT	GO:0006091~generation of precursor metabolites and energy	25	5.59284	1.38908e-06	ENSG00000158571, ENSG00000067177, ENSG00000112992, ENSG00000111669, ENSG00000146701, ENSG00000116678, ENSG00000067225, ENSG00000134333, ENSG00000114480, ENSG00000132825, ENSG00000102144, ENSG00000105220, ENSG00000004864, ENSG00000128524, ENSG00000079739, ENSG00000135447, ENSG00000138413, ENSG00000164708, ENSG00000072778, ENSG00000171503, ENSG00000151376, ENSG00000164776, ENSG00000184203, ENSG0000…
GOTERM_BP_FAT	GO:0046365~monosaccharide catabolic process	12	2.68456	1.51527e-06	ENSG00000158571, ENSG00000141959, ENSG00000134333, ENSG00000176920, ENSG00000111669, ENSG00000164708, ENSG00000102144, ENSG00000146701, ENSG00000105220, ENSG00000067225, ENSG00000079739, ENSG00000111716
GOTERM_BP_FAT	GO:0006007~glucose catabolic process	11	2.46085	1.65948e-06	ENSG00000158571, ENSG00000141959, ENSG00000134333, ENSG00000111669, ENSG00000164708, ENSG00000102144, ENSG00000146701, ENSG00000105220, ENSG00000067225, ENSG00000079739, ENSG00000111716
GOTERM_BP_FAT	GO:0007517~muscle organ development	20	4.47427	1.71258e-06	ENSG00000165887, ENSG00000111245, ENSG00000106624, ENSG00000159251, ENSG00000117707, ENSG00000143171, ENSG00000183386, ENSG00000128709, ENSG00000117054, ENSG00000198523, ENSG00000197616, ENSG00000109846, ENSG00000129170, ENSG00000138379, ENSG00000152413, ENSG00000088832, ENSG00000129991, ENSG00000147166, ENSG00000133026, ENSG00000115461
GOTERM_BP_FAT	GO:0006094~gluconeogenesis	8	1.78971	2.01537e-06	ENSG00000158571, ENSG00000115159, ENSG00000111669, ENSG00000164708, ENSG00000162772, ENSG00000128272, ENSG00000105220, ENSG00000079739
GOTERM_BP_FAT	GO:0046164~alcohol catabolic process	12	2.68456	5.72695e-06	ENSG00000158571, ENSG00000141959, ENSG00000134333, ENSG00000176920, ENSG00000111669, ENSG00000164708, ENSG00000102144, ENSG00000146701, ENSG00000105220, ENSG00000067225, ENSG00000079739, ENSG00000111716
GOTERM_BP_FAT	GO:0044275~cellular carbohydrate catabolic process	12	2.68456	9.20983e-06	ENSG00000158571, ENSG00000141959, ENSG00000134333, ENSG00000176920, ENSG00000111669, ENSG00000164708, ENSG00000102144, ENSG00000146701, ENSG00000105220, ENSG00000067225, ENSG00000079739, ENSG00000111716
GOTERM_BP_FAT	GO:0014706~striated muscle tissue development	14	3.13199	9.59745e-06	ENSG00000111245, ENSG00000159251, ENSG00000117707, ENSG00000143171, ENSG00000117054, ENSG00000198523, ENSG00000128709, ENSG00000197616, ENSG00000129170, ENSG00000152413, ENSG00000088832, ENSG00000129991, ENSG00000133026, ENSG00000115461
GOTERM_BP_FAT	GO:0019319~hexose biosynthetic process	8	1.78971	9.67407e-06	ENSG00000158571, ENSG00000115159, ENSG00000111669, ENSG00000164708, ENSG00000162772, ENSG00000128272, ENSG00000105220, ENSG00000079739
GOTERM_BP_FAT	GO:0048738~cardiac muscle tissue development	10	2.23714	1.17186e-05	ENSG00000111245, ENSG00000129170, ENSG00000159251, ENSG00000117707, ENSG00000088832, ENSG00000129991, ENSG00000198523, ENSG00000117054, ENSG00000133026, ENSG00000197616
GOTERM_BP_FAT	GO:0016051~carbohydrate biosynthetic process	13	2.90828	1.61562e-05	ENSG00000158571, ENSG00000115159, ENSG00000111669, ENSG00000164708, ENSG00000162772, ENSG00000138604, ENSG00000164776, ENSG00000140557, ENSG00000114480, ENSG00000128272, ENSG00000105220, ENSG00000169255, ENSG00000079739
GOTERM_BP_FAT	GO:0060537~muscle tissue development	14	3.13199	1.64226e-05	ENSG00000111245, ENSG00000159251, ENSG00000117707, ENSG00000143171, ENSG00000117054, ENSG00000198523, ENSG00000128709, ENSG00000197616, ENSG00000129170, ENSG00000152413, ENSG00000088832, ENSG00000129991, ENSG00000133026, ENSG00000115461
GOTERM_BP_FAT	GO:0007507~heart development	18	4.02685	3.31727e-05	ENSG00000168542, ENSG00000111245, ENSG00000020426, ENSG00000159251, ENSG00000130635, ENSG00000117707, ENSG00000135111, ENSG00000117054, ENSG00000198523, ENSG00000197616, ENSG00000129170, ENSG00000082014, ENSG00000156925, ENSG00000088832, ENSG00000118729, ENSG00000129991, ENSG00000133026, ENSG00000164442
GOTERM_BP_FAT	GO:0046364~monosaccharide biosynthetic process	8	1.78971	3.32449e-05	ENSG00000158571, ENSG00000115159, ENSG00000111669, ENSG00000164708, ENSG00000162772, ENSG00000128272, ENSG00000105220, ENSG00000079739
GOTERM_BP_FAT	GO:0034637~cellular carbohydrate biosynthetic process	10	2.23714	5.65609e-05	ENSG00000158571, ENSG00000115159, ENSG00000111669, ENSG00000164708, ENSG00000114480, ENSG00000162772, ENSG00000128272, ENSG00000105220, ENSG00000164776, ENSG00000079739
GOTERM_BP_FAT	GO:0003007~heart morphogenesis	10	2.23714	8.86749e-05	ENSG00000111245, ENSG00000082014, ENSG00000159251, ENSG00000117707, ENSG00000130635, ENSG00000088832, ENSG00000135111, ENSG00000156925, ENSG00000129991, ENSG00000197616
GOTERM_BP_FAT	GO:0003012~muscle system process	15	3.3557	9.34585e-05	ENSG00000165887, ENSG00000006788, ENSG00000164708, ENSG00000159251, ENSG00000198225, ENSG00000197616, ENSG00000118804, ENSG00000109846, ENSG00000138379, ENSG00000077522, ENSG00000091482, ENSG00000152413, ENSG00000118729, ENSG00000088832, ENSG00000129991
GOTERM_BP_FAT	GO:0016052~carbohydrate catabolic process	12	2.68456	9.65899e-05	ENSG00000158571, ENSG00000141959, ENSG00000134333, ENSG00000176920, ENSG00000111669, ENSG00000164708, ENSG00000102144, ENSG00000146701, ENSG00000105220, ENSG00000067225, ENSG00000079739, ENSG00000111716
GOTERM_BP_FAT	GO:0046165~alcohol biosynthetic process	8	1.78971	0.000106309	ENSG00000158571, ENSG00000115159, ENSG00000111669, ENSG00000164708, ENSG00000162772, ENSG00000128272, ENSG00000105220, ENSG00000079739
GOTERM_BP_FAT	GO:0006936~muscle contraction	14	3.13199	0.000136162	ENSG00000165887, ENSG00000006788, ENSG00000164708, ENSG00000159251, ENSG00000198225, ENSG00000197616, ENSG00000118804, ENSG00000109846, ENSG00000077522, ENSG00000091482, ENSG00000152413, ENSG00000118729, ENSG00000088832, ENSG00000129991
GOTERM_BP_FAT	GO:0015980~energy derivation by oxidation of organic compounds	13	2.90828	0.000293295	ENSG00000067177, ENSG00000112992, ENSG00000138413, ENSG00000114480, ENSG00000132825, ENSG00000146701, ENSG00000116678, ENSG00000072778, ENSG00000151376, ENSG00000184203, ENSG00000164776, ENSG00000004864, ENSG00000135447
GOTERM_BP_FAT	GO:0055003~cardiac myofibril assembly	4	0.894855	0.000302684	ENSG00000111245, ENSG00000159251, ENSG00000117707, ENSG00000133026
GOTERM_BP_FAT	GO:0055114~oxidation reduction	32	7.15884	0.000391477	ENSG00000112992, ENSG00000115361, ENSG00000146701, ENSG00000140043, ENSG00000149084, ENSG00000133816, ENSG00000123131, ENSG00000117054, ENSG00000090013, ENSG00000134333, ENSG00000109854, ENSG00000116157, ENSG00000082212, ENSG00000119471, ENSG00000004864, ENSG00000085662, ENSG00000099797, ENSG00000115159, ENSG00000138413, ENSG00000203797, ENSG00000170271, ENSG00000072778, ENSG00000171503, ENSG0000…
GOTERM_BP_FAT	GO:0060415~muscle tissue morphogenesis	6	1.34228	0.000511977	ENSG00000111245, ENSG00000159251, ENSG00000117707, ENSG00000088832, ENSG00000129991, ENSG00000197616
GOTERM_BP_FAT	GO:0055008~cardiac muscle tissue morphogenesis	6	1.34228	0.000511977	ENSG00000111245, ENSG00000159251, ENSG00000117707, ENSG00000088832, ENSG00000129991, ENSG00000197616
GOTERM_BP_FAT	GO:0006112~energy reserve metabolic process	7	1.566	0.000691541	ENSG00000067177, ENSG00000114480, ENSG00000132825, ENSG00000116678, ENSG00000164776, ENSG00000184203, ENSG00000135447
GOTERM_BP_FAT	GO:0006941~striated muscle contraction	7	1.566	0.000997111	ENSG00000164708, ENSG00000159251, ENSG00000091482, ENSG00000152413, ENSG00000118729, ENSG00000129991, ENSG00000197616
GOTERM_BP_FAT	GO:0015718~monocarboxylic acid transport	7	1.566	0.00155443	ENSG00000170190, ENSG00000186951, ENSG00000121769, ENSG00000147872, ENSG00000155380, ENSG00000141526, ENSG00000157184
GOTERM_BP_FAT	GO:0006631~fatty acid metabolic process	14	3.13199	0.00158841	ENSG00000111669, ENSG00000115361, ENSG00000170271, ENSG00000119927, ENSG00000076555, ENSG00000072778, ENSG00000171503, ENSG00000117054, ENSG00000186951, ENSG00000121769, ENSG00000084754, ENSG00000011198, ENSG00000157184, ENSG00000175564
GOTERM_BP_FAT	GO:0030239~myofibril assembly	5	1.11857	0.00170861	ENSG00000111245, ENSG00000159251, ENSG00000117707, ENSG00000133026, ENSG00000197616
GOTERM_BP_FAT	GO:0005977~glycogen metabolic process	6	1.34228	0.00174494	ENSG00000067177, ENSG00000114480, ENSG00000132825, ENSG00000164776, ENSG00000184203, ENSG00000135447
GOTERM_BP_FAT	GO:0030036~actin cytoskeleton organization	15	3.3557	0.00184544	ENSG00000111245, ENSG00000034510, ENSG00000159251, ENSG00000185532, ENSG00000117707, ENSG00000088986, ENSG00000183386, ENSG00000158164, ENSG00000197616, ENSG00000131504, ENSG00000077549, ENSG00000158427, ENSG00000071051, ENSG00000134775, ENSG00000070087, ENSG00000133026
GOTERM_BP_FAT	GO:0044042~glucan metabolic process	6	1.34228	0.00198504	ENSG00000067177, ENSG00000114480, ENSG00000132825, ENSG00000164776, ENSG00000184203, ENSG00000135447
GOTERM_BP_FAT	GO:0010927~cellular component assembly involved in morphogenesis	6	1.34228	0.00198504	ENSG00000111245, ENSG00000159251, ENSG00000117707, ENSG00000107954, ENSG00000133026, ENSG00000197616
GOTERM_BP_FAT	GO:0006073~cellular glucan metabolic process	6	1.34228	0.00198504	ENSG00000067177, ENSG00000114480, ENSG00000132825, ENSG00000164776, ENSG00000184203, ENSG00000135447
GOTERM_BP_FAT	GO:0055010~ventricular cardiac muscle morphogenesis	5	1.11857	0.00204713	ENSG00000111245, ENSG00000117707, ENSG00000088832, ENSG00000129991, ENSG00000197616
GOTERM_BP_FAT	GO:0055013~cardiac muscle cell development	4	0.894855	0.00227243	ENSG00000111245, ENSG00000159251, ENSG00000117707, ENSG00000133026
GOTERM_BP_FAT	GO:0055006~cardiac cell development	4	0.894855	0.00227243	ENSG00000111245, ENSG00000159251, ENSG00000117707, ENSG00000133026
GOTERM_BP_FAT	GO:0055007~cardiac muscle cell differentiation	5	1.11857	0.0024293	ENSG00000111245, ENSG00000159251, ENSG00000117707, ENSG00000117054, ENSG00000133026
GOTERM_BP_FAT	GO:0010565~regulation of cellular ketone metabolic process	7	1.566	0.0030627	ENSG00000167244, ENSG00000186951, ENSG00000117707, ENSG00000076555, ENSG00000009950, ENSG00000128989, ENSG00000157184
GOTERM_BP_FAT	GO:0046496~nicotinamide nucleotide metabolic process	6	1.34228	0.00319091	ENSG00000173614, ENSG00000111669, ENSG00000138413, ENSG00000146701, ENSG00000163864, ENSG00000111716
GOTERM_BP_FAT	GO:0006769~nicotinamide metabolic process	6	1.34228	0.00319091	ENSG00000173614, ENSG00000111669, ENSG00000138413, ENSG00000146701, ENSG00000163864, ENSG00000111716
GOTERM_BP_FAT	GO:0030029~actin filament-based process	15	3.3557	0.00331883	ENSG00000111245, ENSG00000034510, ENSG00000159251, ENSG00000185532, ENSG00000117707, ENSG00000088986, ENSG00000183386, ENSG00000158164, ENSG00000197616, ENSG00000131504, ENSG00000077549, ENSG00000158427, ENSG00000071051, ENSG00000134775, ENSG00000070087, ENSG00000133026
GOTERM_BP_FAT	GO:0009820~alkaloid metabolic process	6	1.34228	0.00356019	ENSG00000173614, ENSG00000111669, ENSG00000138413, ENSG00000146701, ENSG00000163864, ENSG00000111716
GOTERM_BP_FAT	GO:0007010~cytoskeleton organization	22	4.9217	0.00365733	ENSG00000111245, ENSG00000151150, ENSG00000034510, ENSG00000159251, ENSG00000117707, ENSG00000185532, ENSG00000107954, ENSG00000123975, ENSG00000088986, ENSG00000159713, ENSG00000183386, ENSG00000158164, ENSG00000197616, ENSG00000170421, ENSG00000131504, ENSG00000077549, ENSG00000158427, ENSG00000071051, ENSG00000109846, ENSG00000196230, ENSG00000134775, ENSG00000070087, ENSG00000133026
GOTERM_BP_FAT	GO:0010891~negative regulation of sequestering of triglyceride	3	0.671141	0.00369686	ENSG00000186951, ENSG00000177666, ENSG00000011198
GOTERM_BP_FAT	GO:0001568~blood vessel development	15	3.3557	0.00384737	ENSG00000138798, ENSG00000168542, ENSG00000130635, ENSG00000116678, ENSG00000117707, ENSG00000135111, ENSG00000119630, ENSG00000129170, ENSG00000109854, ENSG00000116132, ENSG00000136451, ENSG00000164692, ENSG00000105220, ENSG00000129991, ENSG00000164442
GOTERM_BP_FAT	GO:0019362~pyridine nucleotide metabolic process	6	1.34228	0.00395916	ENSG00000173614, ENSG00000111669, ENSG00000138413, ENSG00000146701, ENSG00000163864, ENSG00000111716
GOTERM_BP_FAT	GO:0051186~cofactor metabolic process	13	2.90828	0.00402545	ENSG00000112992, ENSG00000173614, ENSG00000111669, ENSG00000138413, ENSG00000146701, ENSG00000152782, ENSG00000080819, ENSG00000082641, ENSG00000137992, ENSG00000160209, ENSG00000154930, ENSG00000163864, ENSG00000111716
GOTERM_BP_FAT	GO:0046942~carboxylic acid transport	11	2.46085	0.00417079	ENSG00000170190, ENSG00000186951, ENSG00000092068, ENSG00000121769, ENSG00000147872, ENSG00000134294, ENSG00000155380, ENSG00000141526, ENSG00000004864, ENSG00000004809, ENSG00000157184
GOTERM_BP_FAT	GO:0015849~organic acid transport	11	2.46085	0.00437558	ENSG00000170190, ENSG00000186951, ENSG00000092068, ENSG00000121769, ENSG00000147872, ENSG00000134294, ENSG00000155380, ENSG00000141526, ENSG00000004864, ENSG00000004809, ENSG00000157184
GOTERM_BP_FAT	GO:0001944~vasculature development	15	3.3557	0.00475446	ENSG00000138798, ENSG00000168542, ENSG00000130635, ENSG00000116678, ENSG00000117707, ENSG00000135111, ENSG00000119630, ENSG00000129170, ENSG00000109854, ENSG00000116132, ENSG00000136451, ENSG00000164692, ENSG00000105220, ENSG00000129991, ENSG00000164442
GOTERM_BP_FAT	GO:0010033~response to organic substance	31	6.93512	0.00508205	ENSG00000158571, ENSG00000167244, ENSG00000116678, ENSG00000159388, ENSG00000173641, ENSG00000154589, ENSG00000121769, ENSG00000112149, ENSG00000126803, ENSG00000140443, ENSG00000204388, ENSG00000088832, ENSG00000204389, ENSG00000168542, ENSG00000145675, ENSG00000138413, ENSG00000159251, ENSG00000113575, ENSG00000135821, ENSG00000187486, ENSG00000198225, ENSG00000070669, ENSG00000141959, ENSG0000…
GOTERM_BP_FAT	GO:0035051~cardiac cell differentiation	5	1.11857	0.00508664	ENSG00000111245, ENSG00000159251, ENSG00000117707, ENSG00000117054, ENSG00000133026
GOTERM_BP_FAT	GO:0031032~actomyosin structure organization	5	1.11857	0.00508664	ENSG00000111245, ENSG00000159251, ENSG00000117707, ENSG00000133026, ENSG00000197616
GOTERM_BP_FAT	GO:0006635~fatty acid beta-oxidation	5	1.11857	0.00508664	ENSG00000084754, ENSG00000072778, ENSG00000171503, ENSG00000117054, ENSG00000157184
GOTERM_BP_FAT	GO:0042326~negative regulation of phosphorylation	6	1.34228	0.00534703	ENSG00000113575, ENSG00000088986, ENSG00000088832, ENSG00000154229, ENSG00000198225, ENSG00000123080
GOTERM_BP_FAT	GO:0006732~coenzyme metabolic process	11	2.46085	0.00552137	ENSG00000112992, ENSG00000173614, ENSG00000111669, ENSG00000138413, ENSG00000160209, ENSG00000154930, ENSG00000137992, ENSG00000146701, ENSG00000152782, ENSG00000163864, ENSG00000111716
GOTERM_BP_FAT	GO:0045834~positive regulation of lipid metabolic process	6	1.34228	0.00587751	ENSG00000167244, ENSG00000186951, ENSG00000177666, ENSG00000134215, ENSG00000009950, ENSG00000011198
GOTERM_BP_FAT	GO:0051146~striated muscle cell differentiation	8	1.78971	0.00684293	ENSG00000111245, ENSG00000159251, ENSG00000117707, ENSG00000152413, ENSG00000043039, ENSG00000117054, ENSG00000133026, ENSG00000197616
GOTERM_BP_FAT	GO:0002026~regulation of the force of heart contraction	4	0.894855	0.0070227	ENSG00000129170, ENSG00000154229, ENSG00000198523, ENSG00000197616
GOTERM_BP_FAT	GO:0010563~negative regulation of phosphorus metabolic process	6	1.34228	0.00704768	ENSG00000113575, ENSG00000088986, ENSG00000088832, ENSG00000154229, ENSG00000198225, ENSG00000123080
GOTERM_BP_FAT	GO:0045936~negative regulation of phosphate metabolic process	6	1.34228	0.00704768	ENSG00000113575, ENSG00000088986, ENSG00000088832, ENSG00000154229, ENSG00000198225, ENSG00000123080
GOTERM_BP_FAT	GO:0019216~regulation of lipid metabolic process	9	2.01342	0.00749961	ENSG00000167244, ENSG00000186951, ENSG00000117707, ENSG00000177666, ENSG00000076555, ENSG00000134215, ENSG00000009950, ENSG00000011198, ENSG00000157184
GOTERM_BP_FAT	GO:0009952~anterior/posterior pattern formation	10	2.23714	0.00918764	ENSG00000104332, ENSG00000122592, ENSG00000162337, ENSG00000135111, ENSG00000156925, ENSG00000114315, ENSG00000128709, ENSG00000105996, ENSG00000005102, ENSG00000159388
GOTERM_BP_FAT	GO:0032409~regulation of transporter activity	5	1.11857	0.00920985	ENSG00000167244, ENSG00000198373, ENSG00000109062, ENSG00000152413, ENSG00000088832
GOTERM_BP_FAT	GO:0006733~oxidoreduction coenzyme metabolic process	6	1.34228	0.00985829	ENSG00000173614, ENSG00000111669, ENSG00000138413, ENSG00000146701, ENSG00000163864, ENSG00000111716
GOTERM_BP_FAT	GO:0055002~striated muscle cell development	6	1.34228	0.00985829	ENSG00000111245, ENSG00000159251, ENSG00000117707, ENSG00000152413, ENSG00000133026, ENSG00000197616
GOTERM_BP_FAT	GO:0001889~liver development	6	1.34228	0.0106656	ENSG00000117707, ENSG00000114315, ENSG00000111275, ENSG00000112893, ENSG00000117054, ENSG00000164442
GOTERM_BP_FAT	GO:0044264~cellular polysaccharide metabolic process	6	1.34228	0.0106656	ENSG00000067177, ENSG00000114480, ENSG00000132825, ENSG00000164776, ENSG00000184203, ENSG00000135447
GOTERM_BP_FAT	GO:0051188~cofactor biosynthetic process	8	1.78971	0.0114367	ENSG00000082641, ENSG00000173614, ENSG00000160209, ENSG00000154930, ENSG00000137992, ENSG00000080819, ENSG00000152782, ENSG00000163864
GOTERM_BP_FAT	GO:0042692~muscle cell differentiation	9	2.01342	0.0116925	ENSG00000111245, ENSG00000082014, ENSG00000159251, ENSG00000117707, ENSG00000152413, ENSG00000043039, ENSG00000117054, ENSG00000133026, ENSG00000197616
GOTERM_BP_FAT	GO:0014070~response to organic cyclic substance	9	2.01342	0.0116925	ENSG00000138413, ENSG00000112149, ENSG00000147872, ENSG00000116678, ENSG00000088832, ENSG00000111275, ENSG00000154229, ENSG00000198225, ENSG00000159388
GOTERM_BP_FAT	GO:0043206~fibril organization	3	0.671141	0.0123033	ENSG00000168542, ENSG00000130635, ENSG00000088832
GOTERM_BP_FAT	GO:0010889~regulation of sequestering of triglyceride	3	0.671141	0.0123033	ENSG00000186951, ENSG00000177666, ENSG00000011198
GOTERM_BP_FAT	GO:0009062~fatty acid catabolic process	5	1.11857	0.0124977	ENSG00000084754, ENSG00000072778, ENSG00000171503, ENSG00000117054, ENSG00000157184
GOTERM_BP_FAT	GO:0031331~positive regulation of cellular catabolic process	5	1.11857	0.0124977	ENSG00000167244, ENSG00000186951, ENSG00000177666, ENSG00000009950, ENSG00000011198
GOTERM_BP_FAT	GO:0055001~muscle cell development	6	1.34228	0.0133562	ENSG00000111245, ENSG00000159251, ENSG00000117707, ENSG00000152413, ENSG00000133026, ENSG00000197616
GOTERM_BP_FAT	GO:0043603~cellular amide metabolic process	6	1.34228	0.0133562	ENSG00000173614, ENSG00000111669, ENSG00000138413, ENSG00000146701, ENSG00000163864, ENSG00000111716
GOTERM_BP_FAT	GO:0045787~positive regulation of cell cycle	6	1.34228	0.0143459	ENSG00000138798, ENSG00000167244, ENSG00000117707, ENSG00000135111, ENSG00000164442, ENSG00000070669
GOTERM_BP_FAT	GO:0019748~secondary metabolic process	7	1.566	0.014806	ENSG00000173614, ENSG00000143320, ENSG00000111669, ENSG00000138413, ENSG00000146701, ENSG00000163864, ENSG00000111716
GOTERM_BP_FAT	GO:0042157~lipoprotein metabolic process	7	1.566	0.0156771	ENSG00000186951, ENSG00000135845, ENSG00000100336, ENSG00000145337, ENSG00000128284, ENSG00000100342, ENSG00000128335
GOTERM_BP_FAT	GO:0006108~malate metabolic process	3	0.671141	0.0161324	ENSG00000146701, ENSG00000082212, ENSG00000151376
GOTERM_BP_FAT	GO:0048729~tissue morphogenesis	11	2.46085	0.0162484	ENSG00000119630, ENSG00000111245, ENSG00000104267, ENSG00000159251, ENSG00000117707, ENSG00000184207, ENSG00000164692, ENSG00000088832, ENSG00000135111, ENSG00000129991, ENSG00000197616
GOTERM_BP_FAT	GO:0030198~extracellular matrix organization	8	1.78971	0.0163073	ENSG00000107742, ENSG00000168542, ENSG00000130635, ENSG00000143382, ENSG00000091986, ENSG00000149084, ENSG00000164692, ENSG00000088832
GOTERM_BP_FAT	GO:0019395~fatty acid oxidation	5	1.11857	0.0164534	ENSG00000084754, ENSG00000072778, ENSG00000171503, ENSG00000117054, ENSG00000157184
GOTERM_BP_FAT	GO:0034440~lipid oxidation	5	1.11857	0.0164534	ENSG00000084754, ENSG00000072778, ENSG00000171503, ENSG00000117054, ENSG00000157184
GOTERM_BP_FAT	GO:0006767~water-soluble vitamin metabolic process	5	1.11857	0.017927	ENSG00000173614, ENSG00000148834, ENSG00000160209, ENSG00000163864, ENSG00000117054
GOTERM_BP_FAT	GO:0031329~regulation of cellular catabolic process	6	1.34228	0.0187946	ENSG00000167244, ENSG00000186951, ENSG00000141458, ENSG00000177666, ENSG00000009950, ENSG00000011198
GOTERM_BP_FAT	GO:0042364~water-soluble vitamin biosynthetic process	4	0.894855	0.0194993	ENSG00000173614, ENSG00000148834, ENSG00000160209, ENSG00000163864
GOTERM_BP_FAT	GO:0042981~regulation of apoptosis	31	6.93512	0.0211159	ENSG00000167244, ENSG00000183520, ENSG00000160213, ENSG00000143382, ENSG00000134215, ENSG00000129473, ENSG00000159388, ENSG00000196230, ENSG00000109854, ENSG00000091436, ENSG00000174307, ENSG00000077522, ENSG00000145604, ENSG00000140443, ENSG00000204388, ENSG00000204389, ENSG00000196954, ENSG00000163864, ENSG00000164442, ENSG00000173614, ENSG00000131747, ENSG00000020426, ENSG00000104332, ENSG0000…
GOTERM_BP_FAT	GO:0005976~polysaccharide metabolic process	8	1.78971	0.0224919	ENSG00000067177, ENSG00000114480, ENSG00000132825, ENSG00000138604, ENSG00000165072, ENSG00000164776, ENSG00000184203, ENSG00000135447
GOTERM_BP_FAT	GO:0043067~regulation of programmed cell death	31	6.93512	0.0237742	ENSG00000167244, ENSG00000183520, ENSG00000160213, ENSG00000143382, ENSG00000134215, ENSG00000129473, ENSG00000159388, ENSG00000196230, ENSG00000109854, ENSG00000091436, ENSG00000174307, ENSG00000077522, ENSG00000145604, ENSG00000140443, ENSG00000204388, ENSG00000204389, ENSG00000196954, ENSG00000163864, ENSG00000164442, ENSG00000173614, ENSG00000131747, ENSG00000020426, ENSG00000104332, ENSG0000…
GOTERM_BP_FAT	GO:0009150~purine ribonucleotide metabolic process	9	2.01342	0.0239588	ENSG00000116748, ENSG00000143153, ENSG00000138363, ENSG00000132681, ENSG00000106992, ENSG00000128524, ENSG00000004864, ENSG00000129244, ENSG00000197616
GOTERM_BP_FAT	GO:0006812~cation transport	23	5.14541	0.0240299	ENSG00000146477, ENSG00000069431, ENSG00000112992, ENSG00000170745, ENSG00000170385, ENSG00000134294, ENSG00000133065, ENSG00000168575, ENSG00000152049, ENSG00000187486, ENSG00000198225, ENSG00000144290, ENSG00000198523, ENSG00000143153, ENSG00000174343, ENSG00000132681, ENSG00000088832, ENSG00000128524, ENSG00000004809, ENSG00000129244, ENSG00000170290, ENSG00000175564, ENSG00000157184
GOTERM_BP_FAT	GO:0019674~NAD metabolic process	4	0.894855	0.024405	ENSG00000173614, ENSG00000146701, ENSG00000163864, ENSG00000111716
GOTERM_BP_FAT	GO:0015711~organic anion transport	5	1.11857	0.0246271	ENSG00000170190, ENSG00000155380, ENSG00000141526, ENSG00000004864, ENSG00000144290
GOTERM_BP_FAT	GO:0010941~regulation of cell death	31	6.93512	0.0247222	ENSG00000167244, ENSG00000183520, ENSG00000160213, ENSG00000143382, ENSG00000134215, ENSG00000129473, ENSG00000159388, ENSG00000196230, ENSG00000109854, ENSG00000091436, ENSG00000174307, ENSG00000077522, ENSG00000145604, ENSG00000140443, ENSG00000204388, ENSG00000204389, ENSG00000196954, ENSG00000163864, ENSG00000164442, ENSG00000173614, ENSG00000131747, ENSG00000020426, ENSG00000104332, ENSG0000…
GOTERM_BP_FAT	GO:0022898~regulation of transmembrane transporter activity	4	0.894855	0.0270842	ENSG00000167244, ENSG00000109062, ENSG00000152413, ENSG00000088832
GOTERM_BP_FAT	GO:0050994~regulation of lipid catabolic process	4	0.894855	0.0270842	ENSG00000167244, ENSG00000186951, ENSG00000177666, ENSG00000011198
GOTERM_BP_FAT	GO:0034762~regulation of transmembrane transport	4	0.894855	0.0299138	ENSG00000167244, ENSG00000109062, ENSG00000152413, ENSG00000088832
GOTERM_BP_FAT	GO:0007512~adult heart development	3	0.671141	0.0301446	ENSG00000020426, ENSG00000133026, ENSG00000197616
GOTERM_BP_FAT	GO:0009108~coenzyme biosynthetic process	6	1.34228	0.0302088	ENSG00000173614, ENSG00000160209, ENSG00000154930, ENSG00000137992, ENSG00000152782, ENSG00000163864
GOTERM_BP_FAT	GO:0030258~lipid modification	6	1.34228	0.0302088	ENSG00000145675, ENSG00000084754, ENSG00000072778, ENSG00000171503, ENSG00000117054, ENSG00000157184
GOTERM_BP_FAT	GO:0006869~lipid transport	9	2.01342	0.0309756	ENSG00000186951, ENSG00000121769, ENSG00000100336, ENSG00000147872, ENSG00000141458, ENSG00000128284, ENSG00000100342, ENSG00000128335, ENSG00000157184
GOTERM_BP_FAT	GO:0051346~negative regulation of hydrolase activity	5	1.11857	0.0326561	ENSG00000116678, ENSG00000160213, ENSG00000116133, ENSG00000088832, ENSG00000129991
GOTERM_BP_FAT	GO:0006811~ion transport	29	6.4877	0.0327694	ENSG00000170190, ENSG00000112992, ENSG00000170385, ENSG00000168575, ENSG00000144290, ENSG00000198523, ENSG00000141526, ENSG00000174343, ENSG00000132681, ENSG00000088832, ENSG00000004864, ENSG00000128524, ENSG00000146477, ENSG00000069431, ENSG00000170745, ENSG00000134294, ENSG00000133065, ENSG00000152049, ENSG00000187486, ENSG00000198225, ENSG00000155380, ENSG00000114923, ENSG00000143153, ENSG0000…
GOTERM_BP_FAT	GO:0015908~fatty acid transport	4	0.894855	0.0328931	ENSG00000186951, ENSG00000121769, ENSG00000147872, ENSG00000157184
GOTERM_BP_FAT	GO:0009110~vitamin biosynthetic process	4	0.894855	0.0328931	ENSG00000173614, ENSG00000148834, ENSG00000160209, ENSG00000163864
GOTERM_BP_FAT	GO:0009259~ribonucleotide metabolic process	9	2.01342	0.0332145	ENSG00000116748, ENSG00000143153, ENSG00000138363, ENSG00000132681, ENSG00000106992, ENSG00000128524, ENSG00000004864, ENSG00000129244, ENSG00000197616
GOTERM_BP_FAT	GO:0003006~reproductive developmental process	13	2.90828	0.0344955	ENSG00000138413, ENSG00000177030, ENSG00000196116, ENSG00000104332, ENSG00000116678, ENSG00000107954, ENSG00000135111, ENSG00000129473, ENSG00000065802, ENSG00000126803, ENSG00000116133, ENSG00000140443, ENSG00000164442
GOTERM_BP_FAT	GO:0019217~regulation of fatty acid metabolic process	5	1.11857	0.0348753	ENSG00000167244, ENSG00000186951, ENSG00000076555, ENSG00000009950, ENSG00000157184
GOTERM_BP_FAT	GO:0009896~positive regulation of catabolic process	5	1.11857	0.0348753	ENSG00000167244, ENSG00000186951, ENSG00000177666, ENSG00000009950, ENSG00000011198
GOTERM_BP_FAT	GO:0006937~regulation of muscle contraction	6	1.34228	0.0354073	ENSG00000159173, ENSG00000133055, ENSG00000111245, ENSG00000143549, ENSG00000129991, ENSG00000154229
GOTERM_BP_FAT	GO:0010888~negative regulation of lipid storage	3	0.671141	0.0355789	ENSG00000186951, ENSG00000177666, ENSG00000011198
GOTERM_BP_FAT	GO:0015697~quaternary ammonium group transport	3	0.671141	0.0355789	ENSG00000146477, ENSG00000004809, ENSG00000157184
GOTERM_BP_FAT	GO:0010035~response to inorganic substance	11	2.46085	0.0358593	ENSG00000164708, ENSG00000020426, ENSG00000104267, ENSG00000109846, ENSG00000141458, ENSG00000165272, ENSG00000154229, ENSG00000004864, ENSG00000080819, ENSG00000188643, ENSG00000175564
GOTERM_BP_FAT	GO:0043588~skin development	4	0.894855	0.036021	ENSG00000168542, ENSG00000130635, ENSG00000116133, ENSG00000164692
GOTERM_BP_FAT	GO:0044271~nitrogen compound biosynthetic process	15	3.3557	0.0369565	ENSG00000173614, ENSG00000197165, ENSG00000116748, ENSG00000117115, ENSG00000135821, ENSG00000138363, ENSG00000080819, ENSG00000070669, ENSG00000082641, ENSG00000143153, ENSG00000132681, ENSG00000163864, ENSG00000004864, ENSG00000128524, ENSG00000129244
GOTERM_BP_FAT	GO:0006766~vitamin metabolic process	6	1.34228	0.0411261	ENSG00000173614, ENSG00000143320, ENSG00000148834, ENSG00000160209, ENSG00000163864, ENSG00000117054
GOTERM_BP_FAT	GO:0050996~positive regulation of lipid catabolic process	3	0.671141	0.041358	ENSG00000186951, ENSG00000177666, ENSG00000011198
GOTERM_BP_FAT	GO:0048514~blood vessel morphogenesis	11	2.46085	0.0419899	ENSG00000138798, ENSG00000119630, ENSG00000129170, ENSG00000109854, ENSG00000117707, ENSG00000116678, ENSG00000116132, ENSG00000136451, ENSG00000105220, ENSG00000129991, ENSG00000164442
GOTERM_BP_FAT	GO:0043009~chordate embryonic development	15	3.3557	0.0425772	ENSG00000170385, ENSG00000104332, ENSG00000122592, ENSG00000117707, ENSG00000119715, ENSG00000114315, ENSG00000135111, ENSG00000128709, ENSG00000197616, ENSG00000105996, ENSG00000116132, ENSG00000112893, ENSG00000133026, ENSG00000164442, ENSG00000005102
GOTERM_BP_FAT	GO:0006084~acetyl-CoA metabolic process	4	0.894855	0.0427172	ENSG00000112992, ENSG00000138413, ENSG00000154930, ENSG00000146701
GOTERM_BP_FAT	GO:0010038~response to metal ion	8	1.78971	0.0453807	ENSG00000164708, ENSG00000020426, ENSG00000104267, ENSG00000141458, ENSG00000165272, ENSG00000004864, ENSG00000080819, ENSG00000188643
GOTERM_BP_FAT	GO:0009792~embryonic development ending in birth or egg hatching	15	3.3557	0.0453874	ENSG00000170385, ENSG00000104332, ENSG00000122592, ENSG00000117707, ENSG00000119715, ENSG00000114315, ENSG00000135111, ENSG00000128709, ENSG00000197616, ENSG00000105996, ENSG00000116132, ENSG00000112893, ENSG00000133026, ENSG00000164442, ENSG00000005102
GOTERM_BP_FAT	GO:0010876~lipid localization	9	2.01342	0.0460612	ENSG00000186951, ENSG00000121769, ENSG00000100336, ENSG00000147872, ENSG00000141458, ENSG00000128284, ENSG00000100342, ENSG00000128335, ENSG00000157184
GOTERM_BP_FAT	GO:0001933~negative regulation of protein amino acid phosphorylation	4	0.894855	0.0462823	ENSG00000113575, ENSG00000088832, ENSG00000154229, ENSG00000198225
GOTERM_BP_FAT	GO:0043526~neuroprotection	3	0.671141	0.0474612	ENSG00000173614, ENSG00000116133, ENSG00000163864
GOTERM_BP_FAT	GO:0046324~regulation of glucose import	4	0.894855	0.0499895	ENSG00000167244, ENSG00000145675, ENSG00000154229, ENSG00000128989
KEGG_PATHWAY	hsa00620:Pyruvate metabolism	10	2.23714	1.18039e-06	ENSG00000085662, ENSG00000134333, ENSG00000154930, ENSG00000146701, ENSG00000076555, ENSG00000082212, ENSG00000151376, ENSG00000111275, ENSG00000067225, ENSG00000111716
KEGG_PATHWAY	hsa00010:Glycolysis / Gluconeogenesis	11	2.46085	5.44522e-06	ENSG00000141959, ENSG00000134333, ENSG00000111669, ENSG00000164708, ENSG00000102144, ENSG00000154930, ENSG00000105220, ENSG00000111275, ENSG00000067225, ENSG00000079739, ENSG00000111716
KEGG_PATHWAY	hsa00640:Propanoate metabolism	8	1.78971	2.34642e-05	ENSG00000134333, ENSG00000154930, ENSG00000084754, ENSG00000076555, ENSG00000111275, ENSG00000117054, ENSG00000111058, ENSG00000111716
KEGG_PATHWAY	hsa04510:Focal adhesion	15	3.3557	0.00151605	ENSG00000138798, ENSG00000168542, ENSG00000111245, ENSG00000145675, ENSG00000106436, ENSG00000130635, ENSG00000134215, ENSG00000115221, ENSG00000131504, ENSG00000119630, ENSG00000077522, ENSG00000140443, ENSG00000164692, ENSG00000154229, ENSG00000186340
KEGG_PATHWAY	hsa00760:Nicotinate and nicotinamide metabolism	5	1.11857	0.00421525	ENSG00000116981, ENSG00000112992, ENSG00000173614, ENSG00000205309, ENSG00000163864
KEGG_PATHWAY	hsa00071:Fatty acid metabolism	6	1.34228	0.00503053	ENSG00000115361, ENSG00000084754, ENSG00000072778, ENSG00000111275, ENSG00000117054, ENSG00000157184
KEGG_PATHWAY	hsa04960:Aldosterone-regulated sodium reabsorption	6	1.34228	0.00560115	ENSG00000167244, ENSG00000145675, ENSG00000143153, ENSG00000132681, ENSG00000154229, ENSG00000129244
KEGG_PATHWAY	hsa04260:Cardiac muscle contraction	8	1.78971	0.00622246	ENSG00000111245, ENSG00000159251, ENSG00000143549, ENSG00000143153, ENSG00000132681, ENSG00000129991, ENSG00000129244, ENSG00000197616
KEGG_PATHWAY	hsa01040:Biosynthesis of unsaturated fatty acids	4	0.894855	0.0230904	ENSG00000099797, ENSG00000084754, ENSG00000149084, ENSG00000165996
KEGG_PATHWAY	hsa04530:Tight junction	9	2.01342	0.0354443	ENSG00000006788, ENSG00000111245, ENSG00000106436, ENSG00000113575, ENSG00000091436, ENSG00000077522, ENSG00000154229, ENSG00000133026, ENSG00000197616
KEGG_PATHWAY	hsa00920:Sulfur metabolism	3	0.671141	0.0436451	ENSG00000213648, ENSG00000197165, ENSG00000196502
KEGG_PATHWAY	hsa03320:PPAR signaling pathway	6	1.34228	0.044891	ENSG00000186951, ENSG00000121769, ENSG00000115361, ENSG00000143171, ENSG00000117054, ENSG00000157184
KEGG_PATHWAY	hsa05414:Dilated cardiomyopathy	7	1.566	0.0453141	ENSG00000111245, ENSG00000159251, ENSG00000143549, ENSG00000129991, ENSG00000115221, ENSG00000198523, ENSG00000197616

## Sheet: Table S4
Table S4: Gene ontology and pathway analysis of PTGs of DELs
Category	Term	Count	%	PValue	Genes
GOTERM_BP_DIRECT	GO:0030049~muscle filament sliding	17	0.692182	5.01102e-06	ENSG00000168530, ENSG00000111245, ENSG00000159173, ENSG00000105048, ENSG00000196465, ENSG00000173991, ENSG00000196091, ENSG00000159251, ENSG00000143549, ENSG00000101470, ENSG00000136842, ENSG00000114854, ENSG00000077522, ENSG00000175084, ENSG00000140416, ENSG00000198467, ENSG00000248746
GOTERM_BP_DIRECT	GO:0061621~canonical glycolysis	13	0.529316	2.52652e-05	ENSG00000158571, ENSG00000114268, ENSG00000111669, ENSG00000164708, ENSG00000123836, ENSG00000067225, ENSG00000159399, ENSG00000160883, ENSG00000141959, ENSG00000111640, ENSG00000102144, ENSG00000105220, ENSG00000108515
GOTERM_BP_DIRECT	GO:0070936~protein K48-linked ubiquitination	18	0.732899	2.83149e-05	ENSG00000114062, ENSG00000077152, ENSG00000184787, ENSG00000085382, ENSG00000140367, ENSG00000182670, ENSG00000177479, ENSG00000186591, ENSG00000049759, ENSG00000078967, ENSG00000170142, ENSG00000099804, ENSG00000109332, ENSG00000092871, ENSG00000118518, ENSG00000265491, ENSG00000145495, ENSG00000127870
GOTERM_BP_DIRECT	GO:0007519~skeletal muscle tissue development	18	0.732899	9.33155e-05	ENSG00000082258, ENSG00000196465, ENSG00000122180, ENSG00000125772, ENSG00000164885, ENSG00000107954, ENSG00000196712, ENSG00000126778, ENSG00000197321, ENSG00000128709, ENSG00000165410, ENSG00000105357, ENSG00000143318, ENSG00000129170, ENSG00000184343, ENSG00000179456, ENSG00000180209, ENSG00000123600
GOTERM_BP_DIRECT	GO:0006936~muscle contraction	29	1.18078	9.42546e-05	ENSG00000081248, ENSG00000118680, ENSG00000168530, ENSG00000108878, ENSG00000196465, ENSG00000160014, ENSG00000266964, ENSG00000170175, ENSG00000130005, ENSG00000118804, ENSG00000120049, ENSG00000180209, ENSG00000165887, ENSG00000099957, ENSG00000143549, ENSG00000152818, ENSG00000120896, ENSG00000130821, ENSG00000170807, ENSG00000163157, ENSG00000136842, ENSG00000109846, ENSG00000140416, ENSG0000…
GOTERM_BP_DIRECT	GO:0006096~glycolytic process	14	0.570033	0.000127904	ENSG00000158571, ENSG00000105953, ENSG00000111669, ENSG00000164708, ENSG00000123836, ENSG00000159399, ENSG00000160883, ENSG00000141959, ENSG00000134333, ENSG00000111640, ENSG00000102144, ENSG00000105220, ENSG00000108515, ENSG00000079739
GOTERM_BP_DIRECT	GO:0002480~antigen processing and presentation of exogenous peptide antigen via MHC class I, TAP-independent	7	0.285016	0.000228285	ENSG00000204632, ENSG00000204525, ENSG00000204592, ENSG00000206503, ENSG00000234745, ENSG00000204642, ENSG00000166710
GOTERM_BP_DIRECT	GO:0008033~tRNA processing	14	0.570033	0.000341876	ENSG00000172315, ENSG00000198874, ENSG00000255561, ENSG00000043514, ENSG00000172336, ENSG00000105171, ENSG00000277149, ENSG00000132463, ENSG00000188917, ENSG00000241370, ENSG00000121486, ENSG00000090861, ENSG00000164167, ENSG00000144034
GOTERM_BP_DIRECT	GO:0006406~mRNA export from nucleus	26	1.05863	0.000465245	ENSG00000161547, ENSG00000205937, ENSG00000116698, ENSG00000111786, ENSG00000116350, ENSG00000151461, ENSG00000100227, ENSG00000163950, ENSG00000113569, ENSG00000163002, ENSG00000131652, ENSG00000198952, ENSG00000162231, ENSG00000168438, ENSG00000160679, ENSG00000265241, ENSG00000136450, ENSG00000188529, ENSG00000168872, ENSG00000163634, ENSG00000125351, ENSG00000093000, ENSG00000115875, ENSG0000…
GOTERM_BP_DIRECT	GO:0098609~cell-cell adhesion	54	2.1987	0.000584679	ENSG00000149115, ENSG00000120265, ENSG00000136261, ENSG00000028528, ENSG00000170759, ENSG00000073921, ENSG00000175792, ENSG00000173992, ENSG00000151929, ENSG00000168003, ENSG00000174996, ENSG00000136830, ENSG00000117450, ENSG00000138592, ENSG00000065613, ENSG00000101367, ENSG00000107438, ENSG00000072518, ENSG00000115514, ENSG00000198242, ENSG00000165119, ENSG00000137575, ENSG00000124831, ENSG0000…
GOTERM_BP_DIRECT	GO:1900034~regulation of cellular response to heat	21	0.855049	0.00069334	ENSG00000204673, ENSG00000070808, ENSG00000093000, ENSG00000148660, ENSG00000167965, ENSG00000005339, ENSG00000112208, ENSG00000113569, ENSG00000106399, ENSG00000151929, ENSG00000163002, ENSG00000082701, ENSG00000132002, ENSG00000096384, ENSG00000109846, ENSG00000141564, ENSG00000204388, ENSG00000204389, ENSG00000168259, ENSG00000162889, ENSG00000102900
GOTERM_BP_DIRECT	GO:0006457~protein folding	39	1.58795	0.000768797	ENSG00000124659, ENSG00000269058, ENSG00000140403, ENSG00000113068, ENSG00000074695, ENSG00000120438, ENSG00000182901, ENSG00000173486, ENSG00000151929, ENSG00000183207, ENSG00000134285, ENSG00000115539, ENSG00000153066, ENSG00000088356, ENSG00000119782, ENSG00000162616, ENSG00000168259, ENSG00000172354, ENSG00000125863, ENSG00000163468, ENSG00000138398, ENSG00000135924, ENSG00000114988, ENSG0000…
GOTERM_BP_DIRECT	GO:0035556~intracellular signal transduction	73	2.97231	0.0010633	ENSG00000071242, ENSG00000154310, ENSG00000162409, ENSG00000185482, ENSG00000169220, ENSG00000163788, ENSG00000101333, ENSG00000198586, ENSG00000056972, ENSG00000173848, ENSG00000163739, ENSG00000188906, ENSG00000198752, ENSG00000115592, ENSG00000072518, ENSG00000141542, ENSG00000089639, ENSG00000135447, ENSG00000151208, ENSG00000169752, ENSG00000137575, ENSG00000111077, ENSG00000115216, ENSG0000…
GOTERM_BP_DIRECT	GO:0006986~response to unfolded protein	14	0.570033	0.00134267	ENSG00000135924, ENSG00000116688, ENSG00000136816, ENSG00000144224, ENSG00000122557, ENSG00000160087, ENSG00000144381, ENSG00000173641, ENSG00000110011, ENSG00000132002, ENSG00000096384, ENSG00000168936, ENSG00000162616, ENSG00000116663
GOTERM_BP_DIRECT	GO:0032007~negative regulation of TOR signaling	11	0.447883	0.00142185	ENSG00000162409, ENSG00000217128, ENSG00000171100, ENSG00000204673, ENSG00000159459, ENSG00000089022, ENSG00000155792, ENSG00000114388, ENSG00000132356, ENSG00000100150, ENSG00000100644
GOTERM_BP_DIRECT	GO:0006396~RNA processing	24	0.977199	0.00166191	ENSG00000120158, ENSG00000105323, ENSG00000165119, ENSG00000100109, ENSG00000111880, ENSG00000132153, ENSG00000003756, ENSG00000132463, ENSG00000138035, ENSG00000174720, ENSG00000104824, ENSG00000152795, ENSG00000072756, ENSG00000188917, ENSG00000133858, ENSG00000164252, ENSG00000090621, ENSG00000131051, ENSG00000101452, ENSG00000163660, ENSG00000171824, ENSG00000197381, ENSG00000123737, ENSG0000…
GOTERM_BP_DIRECT	GO:0006412~translation	49	1.99511	0.00199776	ENSG00000131469, ENSG00000266472, ENSG00000115866, ENSG00000114120, ENSG00000125691, ENSG00000145912, ENSG00000144029, ENSG00000197756, ENSG00000171858, ENSG00000082515, ENSG00000107864, ENSG00000004864, ENSG00000116120, ENSG00000125454, ENSG00000148339, ENSG00000198242, ENSG00000172590, ENSG00000155287, ENSG00000144713, ENSG00000152684, ENSG00000162461, ENSG00000132313, ENSG00000155906, ENSG0000…
GOTERM_BP_DIRECT	GO:0016236~macroautophagy	20	0.814332	0.00213208	ENSG00000116688, ENSG00000162409, ENSG00000181929, ENSG00000165861, ENSG00000154174, ENSG00000130204, ENSG00000167965, ENSG00000070540, ENSG00000188554, ENSG00000175224, ENSG00000115592, ENSG00000110497, ENSG00000107897, ENSG00000141564, ENSG00000197548, ENSG00000109270, ENSG00000144848, ENSG00000025039, ENSG00000131791, ENSG00000132356
GOTERM_BP_DIRECT	GO:0006094~gluconeogenesis	14	0.570033	0.00214975	ENSG00000158571, ENSG00000111669, ENSG00000111640, ENSG00000115159, ENSG00000164708, ENSG00000109819, ENSG00000102144, ENSG00000160741, ENSG00000173599, ENSG00000128272, ENSG00000105220, ENSG00000108515, ENSG00000004864, ENSG00000079739
GOTERM_BP_DIRECT	GO:0006635~fatty acid beta-oxidation	14	0.570033	0.00214975	ENSG00000111271, ENSG00000138796, ENSG00000115361, ENSG00000104823, ENSG00000072778, ENSG00000164751, ENSG00000117054, ENSG00000117528, ENSG00000121310, ENSG00000138029, ENSG00000167315, ENSG00000084754, ENSG00000075239, ENSG00000157184
GOTERM_BP_DIRECT	GO:0006468~protein phosphorylation	79	3.21661	0.00235493	ENSG00000154310, ENSG00000162409, ENSG00000181929, ENSG00000156873, ENSG00000070808, ENSG00000174891, ENSG00000163788, ENSG00000107779, ENSG00000198586, ENSG00000166333, ENSG00000173327, ENSG00000188906, ENSG00000198752, ENSG00000134318, ENSG00000115592, ENSG00000173137, ENSG00000050748, ENSG00000152256, ENSG00000072518, ENSG00000115977, ENSG00000198796, ENSG00000136098, ENSG00000005882, ENSG0000…
GOTERM_BP_DIRECT	GO:0048025~negative regulation of mRNA splicing, via spliceosome	9	0.36645	0.0026645	ENSG00000165119, ENSG00000150459, ENSG00000205937, ENSG00000111786, ENSG00000100813, ENSG00000116350, ENSG00000115875, ENSG00000182872, ENSG00000188529
GOTERM_BP_DIRECT	GO:0060048~cardiac muscle contraction	14	0.570033	0.00268243	ENSG00000168530, ENSG00000111245, ENSG00000159173, ENSG00000018625, ENSG00000173991, ENSG00000159251, ENSG00000105711, ENSG00000171298, ENSG00000129170, ENSG00000114854, ENSG00000143153, ENSG00000140416, ENSG00000118729, ENSG00000136450
GOTERM_BP_DIRECT	GO:0008542~visual learning	14	0.570033	0.00268243	ENSG00000177030, ENSG00000033800, ENSG00000018625, ENSG00000169220, ENSG00000164885, ENSG00000157764, ENSG00000196712, ENSG00000040531, ENSG00000196639, ENSG00000142192, ENSG00000157404, ENSG00000085788, ENSG00000115183, ENSG00000100644
GOTERM_BP_DIRECT	GO:0005975~carbohydrate metabolic process	36	1.4658	0.00286765	ENSG00000161013, ENSG00000154330, ENSG00000237763, ENSG00000166411, ENSG00000131446, ENSG00000162066, ENSG00000168003, ENSG00000134333, ENSG00000196547, ENSG00000130714, ENSG00000149541, ENSG00000105220, ENSG00000179085, ENSG00000113552, ENSG00000079739, ENSG00000174876, ENSG00000068976, ENSG00000085662, ENSG00000101638, ENSG00000062485, ENSG00000110917, ENSG00000187733, ENSG00000182054, ENSG0000…
GOTERM_BP_DIRECT	GO:1903779~regulation of cardiac conduction	16	0.651466	0.00296352	ENSG00000168710, ENSG00000018625, ENSG00000089250, ENSG00000196296, ENSG00000164983, ENSG00000187486, ENSG00000266964, ENSG00000198523, ENSG00000123104, ENSG00000143318, ENSG00000143153, ENSG00000132681, ENSG00000118729, ENSG00000119782, ENSG00000129244, ENSG00000067842
GOTERM_BP_DIRECT	GO:0006289~nucleotide-excision repair	13	0.529316	0.00343031	ENSG00000111358, ENSG00000185379, ENSG00000134574, ENSG00000163161, ENSG00000110768, ENSG00000175595, ENSG00000106399, ENSG00000014824, ENSG00000145736, ENSG00000114026, ENSG00000136936, ENSG00000147400, ENSG00000183474
GOTERM_BP_DIRECT	GO:0000398~mRNA splicing, via spliceosome	43	1.75081	0.00386555	ENSG00000105323, ENSG00000161547, ENSG00000099783, ENSG00000100109, ENSG00000205937, ENSG00000111786, ENSG00000198258, ENSG00000162437, ENSG00000116350, ENSG00000174891, ENSG00000033030, ENSG00000240682, ENSG00000104824, ENSG00000077312, ENSG00000168438, ENSG00000101452, ENSG00000164167, ENSG00000196504, ENSG00000169249, ENSG00000265241, ENSG00000136450, ENSG00000100319, ENSG00000188529, ENSG0000…
GOTERM_BP_DIRECT	GO:0031032~actomyosin structure organization	10	0.407166	0.00418303	ENSG00000171357, ENSG00000198752, ENSG00000143776, ENSG00000159251, ENSG00000064042, ENSG00000130176, ENSG00000088367, ENSG00000105357, ENSG00000100345, ENSG00000133026
GOTERM_BP_DIRECT	GO:0046034~ATP metabolic process	11	0.447883	0.00437367	ENSG00000002330, ENSG00000148339, ENSG00000147416, ENSG00000018625, ENSG00000133805, ENSG00000143153, ENSG00000204388, ENSG00000106992, ENSG00000143774, ENSG00000204389, ENSG00000040531
GOTERM_BP_DIRECT	GO:0043268~positive regulation of potassium ion transport	6	0.2443	0.00445981	ENSG00000163485, ENSG00000006071, ENSG00000170759, ENSG00000022267, ENSG00000077522, ENSG00000075711
GOTERM_BP_DIRECT	GO:0006937~regulation of muscle contraction	7	0.285016	0.00467094	ENSG00000101470, ENSG00000004776, ENSG00000077157, ENSG00000105048, ENSG00000114854, ENSG00000140416, ENSG00000197043
GOTERM_BP_DIRECT	GO:0006295~nucleotide-excision repair, DNA incision, 3'-to lesion	9	0.36645	0.00510508	ENSG00000111358, ENSG00000134897, ENSG00000145736, ENSG00000134574, ENSG00000163161, ENSG00000136936, ENSG00000110768, ENSG00000175595, ENSG00000106399
GOTERM_BP_DIRECT	GO:1901796~regulation of signal transduction by p53 class mediator	27	1.09935	0.00531865	ENSG00000122728, ENSG00000172315, ENSG00000163781, ENSG00000161642, ENSG00000162409, ENSG00000074590, ENSG00000181929, ENSG00000147133, ENSG00000064995, ENSG00000112592, ENSG00000102054, ENSG00000106399, ENSG00000143499, ENSG00000115592, ENSG00000187325, ENSG00000197299, ENSG00000197780, ENSG00000164885, ENSG00000089022, ENSG00000127445, ENSG00000156983, ENSG00000170004, ENSG00000071655, ENSG0000…
GOTERM_BP_DIRECT	GO:0000184~nuclear-transcribed mRNA catabolic process, nonsense-mediated decay	26	1.05863	0.00603659	ENSG00000131469, ENSG00000205937, ENSG00000116698, ENSG00000151461, ENSG00000105193, ENSG00000125691, ENSG00000171858, ENSG00000197756, ENSG00000105568, ENSG00000198952, ENSG00000265241, ENSG00000134030, ENSG00000114867, ENSG00000233927, ENSG00000189266, ENSG00000188846, ENSG00000169062, ENSG00000198242, ENSG00000265681, ENSG00000144713, ENSG00000113575, ENSG00000125351, ENSG00000116251, ENSG0000…
GOTERM_BP_DIRECT	GO:0046716~muscle cell cellular homeostasis	8	0.325733	0.00608872	ENSG00000171298, ENSG00000005893, ENSG00000119401, ENSG00000171100, ENSG00000142168, ENSG00000138379, ENSG00000165410, ENSG00000100644
GOTERM_BP_DIRECT	GO:0002318~myeloid progenitor cell differentiation	5	0.203583	0.00624849	ENSG00000178053, ENSG00000168769, ENSG00000137700, ENSG00000157404, ENSG00000157764
GOTERM_BP_DIRECT	GO:0006405~RNA export from nucleus	15	0.610749	0.00658407	ENSG00000161547, ENSG00000205937, ENSG00000111786, ENSG00000116350, ENSG00000163634, ENSG00000125351, ENSG00000115875, ENSG00000100227, ENSG00000113569, ENSG00000131652, ENSG00000162231, ENSG00000168438, ENSG00000160679, ENSG00000265241, ENSG00000136450
GOTERM_BP_DIRECT	GO:0007015~actin filament organization	18	0.732899	0.00662847	ENSG00000044115, ENSG00000139725, ENSG00000034510, ENSG00000143549, ENSG00000047648, ENSG00000120896, ENSG00000170807, ENSG00000163157, ENSG00000254999, ENSG00000136842, ENSG00000154553, ENSG00000071051, ENSG00000147439, ENSG00000140416, ENSG00000075711, ENSG00000134775, ENSG00000050820, ENSG00000198467
GOTERM_BP_DIRECT	GO:0003009~skeletal muscle contraction	9	0.36645	0.00683097	ENSG00000101470, ENSG00000159173, ENSG00000105048, ENSG00000173991, ENSG00000185482, ENSG00000114854, ENSG00000152413, ENSG00000170175, ENSG00000105357
GOTERM_BP_DIRECT	GO:0043968~histone H2A acetylation	7	0.285016	0.00696971	ENSG00000183207, ENSG00000123562, ENSG00000196367, ENSG00000112983, ENSG00000175792, ENSG00000120616, ENSG00000163875
GOTERM_BP_DIRECT	GO:0042026~protein refolding	7	0.285016	0.00696971	ENSG00000135924, ENSG00000140403, ENSG00000144381, ENSG00000204388, ENSG00000119782, ENSG00000204389, ENSG00000166710
GOTERM_BP_DIRECT	GO:0016573~histone acetylation	11	0.447883	0.00704018	ENSG00000122728, ENSG00000103510, ENSG00000140396, ENSG00000111653, ENSG00000196367, ENSG00000276234, ENSG00000071655, ENSG00000147133, ENSG00000005339, ENSG00000277258, ENSG00000163875
GOTERM_BP_DIRECT	GO:0006099~tricarboxylic acid cycle	10	0.407166	0.00709354	ENSG00000105953, ENSG00000112992, ENSG00000138413, ENSG00000204370, ENSG00000062485, ENSG00000166411, ENSG00000182054, ENSG00000091483, ENSG00000100412, ENSG00000172340
GOTERM_BP_DIRECT	GO:0005977~glycogen metabolic process	10	0.407166	0.00709354	ENSG00000068976, ENSG00000134352, ENSG00000082701, ENSG00000154415, ENSG00000114480, ENSG00000132825, ENSG00000156873, ENSG00000137700, ENSG00000113555, ENSG00000135447
GOTERM_BP_DIRECT	GO:0045214~sarcomere organization	10	0.407166	0.00709354	ENSG00000108946, ENSG00000138347, ENSG00000143318, ENSG00000173991, ENSG00000077522, ENSG00000140416, ENSG00000118729, ENSG00000134775, ENSG00000170807, ENSG00000165410
GOTERM_BP_DIRECT	GO:0031124~mRNA 3'-end processing	14	0.570033	0.00718643	ENSG00000161547, ENSG00000205937, ENSG00000111786, ENSG00000116350, ENSG00000163634, ENSG00000125351, ENSG00000115875, ENSG00000100227, ENSG00000090060, ENSG00000131652, ENSG00000168438, ENSG00000160679, ENSG00000265241, ENSG00000136450
GOTERM_BP_DIRECT	GO:0051865~protein autoubiquitination	14	0.570033	0.00718643	ENSG00000181852, ENSG00000114062, ENSG00000148356, ENSG00000077152, ENSG00000110315, ENSG00000167333, ENSG00000138942, ENSG00000134574, ENSG00000123091, ENSG00000108395, ENSG00000082996, ENSG00000109332, ENSG00000118518, ENSG00000265491
GOTERM_BP_DIRECT	GO:0006006~glucose metabolic process	17	0.692182	0.00740407	ENSG00000005882, ENSG00000165434, ENSG00000162600, ENSG00000154330, ENSG00000137700, ENSG00000187486, ENSG00000117448, ENSG00000112294, ENSG00000010322, ENSG00000183208, ENSG00000171298, ENSG00000189058, ENSG00000111640, ENSG00000152256, ENSG00000113552, ENSG00000079739, ENSG00000132356
GOTERM_BP_DIRECT	GO:0032259~methylation	18	0.732899	0.00765755	ENSG00000141744, ENSG00000038274, ENSG00000171806, ENSG00000138382, ENSG00000186523, ENSG00000141956, ENSG00000130005, ENSG00000156239, ENSG00000010165, ENSG00000169612, ENSG00000137364, ENSG00000214435, ENSG00000214756, ENSG00000145194, ENSG00000116984, ENSG00000145002, ENSG00000123600, ENSG00000158483
GOTERM_BP_DIRECT	GO:0001666~response to hypoxia	34	1.38436	0.00779999	ENSG00000132155, ENSG00000183044, ENSG00000107562, ENSG00000089250, ENSG00000163161, ENSG00000214274, ENSG00000067225, ENSG00000107159, ENSG00000134333, ENSG00000123104, ENSG00000002330, ENSG00000103245, ENSG00000069509, ENSG00000107438, ENSG00000103415, ENSG00000158578, ENSG00000176171, ENSG00000114650, ENSG00000119699, ENSG00000163485, ENSG00000139567, ENSG00000197635, ENSG00000144381, ENSG0000…
GOTERM_BP_DIRECT	GO:0006418~tRNA aminoacylation for protein translation	12	0.488599	0.0083275	ENSG00000134684, ENSG00000138777, ENSG00000134905, ENSG00000137411, ENSG00000067704, ENSG00000090861, ENSG00000115866, ENSG00000110619, ENSG00000136628, ENSG00000116874, ENSG00000116120, ENSG00000011376
GOTERM_BP_DIRECT	GO:0010508~positive regulation of autophagy	12	0.488599	0.0083275	ENSG00000002330, ENSG00000162409, ENSG00000198168, ENSG00000166289, ENSG00000112561, ENSG00000197548, ENSG00000051382, ENSG00000114388, ENSG00000145632, ENSG00000176171, ENSG00000132356, ENSG00000188906
GOTERM_BP_DIRECT	GO:0007050~cell cycle arrest	29	1.18078	0.00850246	ENSG00000162409, ENSG00000071246, ENSG00000181929, ENSG00000151465, ENSG00000090097, ENSG00000167965, ENSG00000115241, ENSG00000166333, ENSG00000184481, ENSG00000178053, ENSG00000115592, ENSG00000091436, ENSG00000141564, ENSG00000109270, ENSG00000100614, ENSG00000124762, ENSG00000174775, ENSG00000148935, ENSG00000116688, ENSG00000106992, ENSG00000123080, ENSG00000111653, ENSG00000171867, ENSG0000…
GOTERM_BP_DIRECT	GO:0000186~activation of MAPKK activity	13	0.529316	0.00935416	ENSG00000163485, ENSG00000080815, ENSG00000107263, ENSG00000132155, ENSG00000157764, ENSG00000085511, ENSG00000188906, ENSG00000166225, ENSG00000124181, ENSG00000091436, ENSG00000135341, ENSG00000109270, ENSG00000149930
GOTERM_BP_DIRECT	GO:0043981~histone H4-K5 acetylation	7	0.285016	0.00998728	ENSG00000139620, ENSG00000136504, ENSG00000103510, ENSG00000111653, ENSG00000172534, ENSG00000163875, ENSG00000144445
GOTERM_BP_DIRECT	GO:0043982~histone H4-K8 acetylation	7	0.285016	0.00998728	ENSG00000139620, ENSG00000136504, ENSG00000103510, ENSG00000111653, ENSG00000172534, ENSG00000163875, ENSG00000144445
GOTERM_BP_DIRECT	GO:0006369~termination of RNA polymerase II transcription	16	0.651466	0.011134	ENSG00000161547, ENSG00000205937, ENSG00000111786, ENSG00000116350, ENSG00000163634, ENSG00000125351, ENSG00000100227, ENSG00000115875, ENSG00000090060, ENSG00000163950, ENSG00000131652, ENSG00000168438, ENSG00000160679, ENSG00000265241, ENSG00000136450, ENSG00000103495
GOTERM_BP_DIRECT	GO:0045333~cellular respiration	8	0.325733	0.0112241	ENSG00000006695, ENSG00000118246, ENSG00000148339, ENSG00000135469, ENSG00000109819, ENSG00000115520, ENSG00000004864, ENSG00000014919
GOTERM_BP_DIRECT	GO:0006293~nucleotide-excision repair, preincision complex stabilization	8	0.325733	0.0112241	ENSG00000111358, ENSG00000145736, ENSG00000134574, ENSG00000163161, ENSG00000136936, ENSG00000110768, ENSG00000175595, ENSG00000106399
GOTERM_BP_DIRECT	GO:0005980~glycogen catabolic process	8	0.325733	0.0112241	ENSG00000068976, ENSG00000171298, ENSG00000118804, ENSG00000160014, ENSG00000162688, ENSG00000156873, ENSG00000164776, ENSG00000079739
GOTERM_BP_DIRECT	GO:0002011~morphogenesis of an epithelial sheet	5	0.203583	0.0112657	ENSG00000072415, ENSG00000173402, ENSG00000101384, ENSG00000148943, ENSG00000173917
GOTERM_BP_DIRECT	GO:0055003~cardiac myofibril assembly	6	0.2443	0.011301	ENSG00000111245, ENSG00000173991, ENSG00000129170, ENSG00000159251, ENSG00000134775, ENSG00000133026
GOTERM_BP_DIRECT	GO:0030100~regulation of endocytosis	10	0.407166	0.011342	ENSG00000176783, ENSG00000115234, ENSG00000136717, ENSG00000108774, ENSG00000042753, ENSG00000073921, ENSG00000196396, ENSG00000039319, ENSG00000165912, ENSG00000140022
GOTERM_BP_DIRECT	GO:0032781~positive regulation of ATPase activity	10	0.407166	0.011342	ENSG00000135924, ENSG00000132002, ENSG00000143153, ENSG00000160679, ENSG00000140416, ENSG00000168259, ENSG00000169905, ENSG00000170946, ENSG00000129244, ENSG00000070087
GOTERM_BP_DIRECT	GO:0005978~glycogen biosynthetic process	9	0.36645	0.0115554	ENSG00000114480, ENSG00000115592, ENSG00000104812, ENSG00000162688, ENSG00000156873, ENSG00000154330, ENSG00000164776, ENSG00000079739, ENSG00000117054
GOTERM_BP_DIRECT	GO:0040014~regulation of multicellular organism growth	9	0.36645	0.0115554	ENSG00000112964, ENSG00000088812, ENSG00000158669, ENSG00000166224, ENSG00000142192, ENSG00000179295, ENSG00000142168, ENSG00000130005, ENSG00000141385
GOTERM_BP_DIRECT	GO:0006367~transcription initiation from RNA polymerase II promoter	30	1.2215	0.0129926	ENSG00000122728, ENSG00000111358, ENSG00000196482, ENSG00000137693, ENSG00000147133, ENSG00000163161, ENSG00000110768, ENSG00000064995, ENSG00000112282, ENSG00000112592, ENSG00000111424, ENSG00000136146, ENSG00000109819, ENSG00000108590, ENSG00000187325, ENSG00000103495, ENSG00000105258, ENSG00000165417, ENSG00000155868, ENSG00000120798, ENSG00000197780, ENSG00000169083, ENSG00000119715, ENSG0000…
GOTERM_BP_DIRECT	GO:0008380~RNA splicing	32	1.30293	0.0141357	ENSG00000161547, ENSG00000100109, ENSG00000205937, ENSG00000116679, ENSG00000116350, ENSG00000174891, ENSG00000182872, ENSG00000203867, ENSG00000131652, ENSG00000109819, ENSG00000105568, ENSG00000168438, ENSG00000132485, ENSG00000131051, ENSG00000164167, ENSG00000169249, ENSG00000146457, ENSG00000265241, ENSG00000100319, ENSG00000116752, ENSG00000168566, ENSG00000138398, ENSG00000112531, ENSG0000…
GOTERM_BP_DIRECT	GO:0006089~lactate metabolic process	4	0.162866	0.016079	ENSG00000134333, ENSG00000123836, ENSG00000137700, ENSG00000100644
GOTERM_BP_DIRECT	GO:0048747~muscle fiber development	6	0.2443	0.0165002	ENSG00000077549, ENSG00000111245, ENSG00000128591, ENSG00000170175, ENSG00000163069, ENSG00000141385
GOTERM_BP_DIRECT	GO:0006974~cellular response to DNA damage stimulus	38	1.54723	0.0167652	ENSG00000163781, ENSG00000161642, ENSG00000137693, ENSG00000074590, ENSG00000139579, ENSG00000147133, ENSG00000198586, ENSG00000134215, ENSG00000177311, ENSG00000146414, ENSG00000111602, ENSG00000068878, ENSG00000133315, ENSG00000197299, ENSG00000124762, ENSG00000010072, ENSG00000102699, ENSG00000162889, ENSG00000275700, ENSG00000163563, ENSG00000137760, ENSG00000080815, ENSG00000135090, ENSG0000…
GOTERM_BP_DIRECT	GO:0006942~regulation of striated muscle contraction	5	0.203583	0.0182903	ENSG00000111245, ENSG00000133055, ENSG00000159173, ENSG00000018625, ENSG00000196296
GOTERM_BP_DIRECT	GO:0048660~regulation of smooth muscle cell proliferation	5	0.203583	0.0182903	ENSG00000079246, ENSG00000253729, ENSG00000196419, ENSG00000148737, ENSG00000168036
GOTERM_BP_DIRECT	GO:0033539~fatty acid beta-oxidation using acyl-CoA dehydrogenase	7	0.285016	0.0185903	ENSG00000177646, ENSG00000111271, ENSG00000115361, ENSG00000072778, ENSG00000171503, ENSG00000196177, ENSG00000117054
GOTERM_BP_DIRECT	GO:0016311~dephosphorylation	19	0.773616	0.0186294	ENSG00000158571, ENSG00000116981, ENSG00000090857, ENSG00000114268, ENSG00000135778, ENSG00000107758, ENSG00000107789, ENSG00000123836, ENSG00000184207, ENSG00000173868, ENSG00000167220, ENSG00000109452, ENSG00000143507, ENSG00000076685, ENSG00000188542, ENSG00000137074, ENSG00000100614, ENSG00000104331, ENSG00000134324
GOTERM_BP_DIRECT	GO:0046835~carbohydrate phosphorylation	8	0.325733	0.0189263	ENSG00000158571, ENSG00000114268, ENSG00000157353, ENSG00000123836, ENSG00000138030, ENSG00000160883, ENSG00000159399, ENSG00000156110
GOTERM_BP_DIRECT	GO:0000302~response to reactive oxygen species	11	0.447883	0.0191168	ENSG00000117450, ENSG00000198431, ENSG00000189058, ENSG00000165168, ENSG00000126432, ENSG00000109819, ENSG00000116157, ENSG00000142168, ENSG00000086991, ENSG00000173992, ENSG00000184470
GOTERM_BP_DIRECT	GO:0006413~translational initiation	27	1.09935	0.019125	ENSG00000131469, ENSG00000198242, ENSG00000188846, ENSG00000100129, ENSG00000265681, ENSG00000144713, ENSG00000130811, ENSG00000173674, ENSG00000105193, ENSG00000135930, ENSG00000125691, ENSG00000111361, ENSG00000158417, ENSG00000241127, ENSG00000197756, ENSG00000171858, ENSG00000175376, ENSG00000178982, ENSG00000125977, ENSG00000116251, ENSG00000142534, ENSG00000162244, ENSG00000233927, ENSG0000…
GOTERM_BP_DIRECT	GO:0016569~covalent chromatin modification	23	0.936482	0.0224915	ENSG00000168556, ENSG00000100395, ENSG00000112511, ENSG00000132467, ENSG00000066117, ENSG00000111875, ENSG00000198586, ENSG00000141027, ENSG00000184205, ENSG00000140320, ENSG00000158636, ENSG00000163322, ENSG00000138336, ENSG00000130816, ENSG00000198945, ENSG00000099991, ENSG00000204256, ENSG00000136144, ENSG00000082014, ENSG00000258315, ENSG00000204463, ENSG00000100307, ENSG00000100084
GOTERM_BP_DIRECT	GO:0035774~positive regulation of insulin secretion involved in cellular response to glucose stimulus	9	0.36645	0.0226064	ENSG00000196126, ENSG00000002330, ENSG00000170759, ENSG00000107758, ENSG00000083720, ENSG00000198502, ENSG00000184381, ENSG00000143158, ENSG00000100644
GOTERM_BP_DIRECT	GO:0018279~protein N-linked glycosylation via asparagine	11	0.447883	0.0227132	ENSG00000129562, ENSG00000168282, ENSG00000120697, ENSG00000008513, ENSG00000184787, ENSG00000244038, ENSG00000074695, ENSG00000163902, ENSG00000160408, ENSG00000179085, ENSG00000183828
GOTERM_BP_DIRECT	GO:0022011~myelination in peripheral nervous system	6	0.2443	0.023072	ENSG00000112414, ENSG00000153902, ENSG00000148498, ENSG00000173402, ENSG00000166333, ENSG00000196712
GOTERM_BP_DIRECT	GO:0006744~ubiquinone biosynthetic process	6	0.2443	0.023072	ENSG00000167113, ENSG00000135469, ENSG00000173085, ENSG00000115520, ENSG00000123815, ENSG00000120942
GOTERM_BP_DIRECT	GO:0008610~lipid biosynthetic process	6	0.2443	0.023072	ENSG00000158669, ENSG00000162409, ENSG00000151726, ENSG00000018510, ENSG00000132356, ENSG00000131069
GOTERM_BP_DIRECT	GO:0019915~lipid storage	8	0.325733	0.0239067	ENSG00000135218, ENSG00000100439, ENSG00000147872, ENSG00000180530, ENSG00000177666, ENSG00000214456, ENSG00000196743, ENSG00000197296
GOTERM_BP_DIRECT	GO:0048041~focal adhesion assembly	8	0.325733	0.0239067	ENSG00000173156, ENSG00000140992, ENSG00000077522, ENSG00000047648, ENSG00000248746, ENSG00000143398, ENSG00000149930, ENSG00000073712
GOTERM_BP_DIRECT	GO:0042593~glucose homeostasis	21	0.855049	0.024195	ENSG00000005882, ENSG00000219607, ENSG00000179295, ENSG00000162409, ENSG00000116678, ENSG00000137700, ENSG00000124160, ENSG00000089060, ENSG00000175354, ENSG00000002330, ENSG00000156026, ENSG00000155380, ENSG00000159346, ENSG00000160741, ENSG00000167191, ENSG00000137509, ENSG00000148737, ENSG00000006831, ENSG00000105220, ENSG00000132356, ENSG00000100644
GOTERM_BP_DIRECT	GO:0006883~cellular sodium ion homeostasis	7	0.285016	0.0243602	ENSG00000049759, ENSG00000018625, ENSG00000090020, ENSG00000143153, ENSG00000132681, ENSG00000129244, ENSG00000118515
GOTERM_BP_DIRECT	GO:0006998~nuclear envelope organization	7	0.285016	0.0243602	ENSG00000111224, ENSG00000100242, ENSG00000161904, ENSG00000166822, ENSG00000113569, ENSG00000102900, ENSG00000054654
GOTERM_BP_DIRECT	GO:0051259~protein oligomerization	14	0.570033	0.0248304	ENSG00000169083, ENSG00000090020, ENSG00000148660, ENSG00000205302, ENSG00000011052, ENSG00000172175, ENSG00000187446, ENSG00000141959, ENSG00000188554, ENSG00000243678, ENSG00000172269, ENSG00000131373, ENSG00000197299, ENSG00000137106
GOTERM_BP_DIRECT	GO:0032436~positive regulation of proteasomal ubiquitin-dependent protein catabolic process	15	0.610749	0.0248432	ENSG00000111667, ENSG00000153071, ENSG00000135924, ENSG00000080815, ENSG00000033800, ENSG00000147133, ENSG00000101695, ENSG00000072609, ENSG00000177479, ENSG00000188906, ENSG00000137393, ENSG00000124226, ENSG00000082701, ENSG00000145632, ENSG00000204389
GOTERM_BP_DIRECT	GO:0060337~type I interferon signaling pathway	15	0.610749	0.0248432	ENSG00000204632, ENSG00000204592, ENSG00000234745, ENSG00000162645, ENSG00000165949, ENSG00000119917, ENSG00000204525, ENSG00000105397, ENSG00000142089, ENSG00000185745, ENSG00000185201, ENSG00000206503, ENSG00000134321, ENSG00000185885, ENSG00000204642
GOTERM_BP_DIRECT	GO:0045454~cell redox homeostasis	17	0.692182	0.027203	ENSG00000116044, ENSG00000198431, ENSG00000112992, ENSG00000126432, ENSG00000089250, ENSG00000113621, ENSG00000087301, ENSG00000213593, ENSG00000123131, ENSG00000184470, ENSG00000117450, ENSG00000196865, ENSG00000165168, ENSG00000091164, ENSG00000116260, ENSG00000153066, ENSG00000115514
GOTERM_BP_DIRECT	GO:0090084~negative regulation of inclusion body assembly	5	0.203583	0.0275107	ENSG00000135924, ENSG00000132002, ENSG00000140403, ENSG00000204388, ENSG00000204389
GOTERM_BP_DIRECT	GO:2000772~regulation of cellular senescence	5	0.203583	0.0275107	ENSG00000168556, ENSG00000071246, ENSG00000074590, ENSG00000138035, ENSG00000107779
GOTERM_BP_DIRECT	GO:0045943~positive regulation of transcription from RNA polymerase I promoter	5	0.203583	0.0275107	ENSG00000172071, ENSG00000108312, ENSG00000147133, ENSG00000128272, ENSG00000141736
GOTERM_BP_DIRECT	GO:0002474~antigen processing and presentation of peptide antigen via MHC class I	9	0.36645	0.0275431	ENSG00000204632, ENSG00000204525, ENSG00000204592, ENSG00000206503, ENSG00000185825, ENSG00000164307, ENSG00000234745, ENSG00000204642, ENSG00000166710
GOTERM_BP_DIRECT	GO:0060087~relaxation of vascular smooth muscle	4	0.162866	0.0291858	ENSG00000163485, ENSG00000185532, ENSG00000142168, ENSG00000116741
GOTERM_BP_DIRECT	GO:0006446~regulation of translational initiation	10	0.407166	0.0299056	ENSG00000079785, ENSG00000158417, ENSG00000085760, ENSG00000178982, ENSG00000100129, ENSG00000130811, ENSG00000134030, ENSG00000114867, ENSG00000149100, ENSG00000111361
GOTERM_BP_DIRECT	GO:0042692~muscle cell differentiation	6	0.2443	0.0311232	ENSG00000136717, ENSG00000112531, ENSG00000163041, ENSG00000082014, ENSG00000111875, ENSG00000100084
GOTERM_BP_DIRECT	GO:1904874~positive regulation of telomerase RNA localization to Cajal body	6	0.2443	0.0311232	ENSG00000145912, ENSG00000163468, ENSG00000183207, ENSG00000145414, ENSG00000175792, ENSG00000120438
GOTERM_BP_DIRECT	GO:0014850~response to muscle activity	6	0.2443	0.0311232	ENSG00000162409, ENSG00000176845, ENSG00000111077, ENSG00000109819, ENSG00000138379, ENSG00000100644
GOTERM_BP_DIRECT	GO:0007095~mitotic G2 DNA damage checkpoint	6	0.2443	0.0311232	ENSG00000163781, ENSG00000135090, ENSG00000133302, ENSG00000197299, ENSG00000053254, ENSG00000184481
GOTERM_BP_DIRECT	GO:0043984~histone H4-K16 acetylation	7	0.285016	0.0312128	ENSG00000139620, ENSG00000136504, ENSG00000103510, ENSG00000111653, ENSG00000172534, ENSG00000163875, ENSG00000144445
GOTERM_BP_DIRECT	GO:0051568~histone H3-K4 methylation	7	0.285016	0.0312128	ENSG00000183576, ENSG00000154832, ENSG00000055609, ENSG00000162961, ENSG00000116539, ENSG00000147050, ENSG00000164091
GOTERM_BP_DIRECT	GO:0009411~response to UV	11	0.447883	0.0313285	ENSG00000145736, ENSG00000259316, ENSG00000119401, ENSG00000134574, ENSG00000163161, ENSG00000166803, ENSG00000164306, ENSG00000175595, ENSG00000010072, ENSG00000132356, ENSG00000011566, ENSG00000075131
GOTERM_BP_DIRECT	GO:0006368~transcription elongation from RNA polymerase II promoter	18	0.732899	0.036247	ENSG00000122728, ENSG00000111358, ENSG00000105258, ENSG00000165417, ENSG00000082258, ENSG00000197780, ENSG00000147133, ENSG00000163634, ENSG00000163161, ENSG00000110768, ENSG00000064995, ENSG00000112592, ENSG00000213246, ENSG00000090061, ENSG00000187735, ENSG00000145736, ENSG00000006712, ENSG00000187325
GOTERM_BP_DIRECT	GO:0000413~protein peptidyl-prolyl isomerization	11	0.447883	0.036401	ENSG00000138398, ENSG00000105701, ENSG00000134285, ENSG00000100442, ENSG00000153015, ENSG00000127445, ENSG00000119782, ENSG00000240344, ENSG00000100023, ENSG00000173486, ENSG00000102309
GOTERM_BP_DIRECT	GO:0006397~mRNA processing	32	1.30293	0.0371397	ENSG00000135473, ENSG00000161547, ENSG00000100109, ENSG00000111786, ENSG00000116350, ENSG00000182872, ENSG00000104824, ENSG00000203867, ENSG00000121274, ENSG00000109819, ENSG00000132485, ENSG00000131051, ENSG00000146457, ENSG00000265241, ENSG00000136450, ENSG00000088930, ENSG00000116752, ENSG00000112531, ENSG00000150459, ENSG00000100813, ENSG00000163634, ENSG00000115875, ENSG00000149187, ENSG0000…
GOTERM_BP_DIRECT	GO:0006364~rRNA processing	37	1.50651	0.0388013	ENSG00000131469, ENSG00000132467, ENSG00000145414, ENSG00000105171, ENSG00000105193, ENSG00000198000, ENSG00000121274, ENSG00000125691, ENSG00000136718, ENSG00000171858, ENSG00000197756, ENSG00000117597, ENSG00000001497, ENSG00000233927, ENSG00000123737, ENSG00000088930, ENSG00000087269, ENSG00000144535, ENSG00000107833, ENSG00000198242, ENSG00000120158, ENSG00000188846, ENSG00000265681, ENSG0000…
GOTERM_BP_DIRECT	GO:0019674~NAD metabolic process	5	0.203583	0.0390367	ENSG00000134333, ENSG00000173614, ENSG00000163864, ENSG00000152642, ENSG00000172890
GOTERM_BP_DIRECT	GO:0071480~cellular response to gamma radiation	7	0.285016	0.0392083	ENSG00000079246, ENSG00000137693, ENSG00000109846, ENSG00000196419, ENSG00000086991, ENSG00000124762, ENSG00000110108
GOTERM_BP_DIRECT	GO:0006783~heme biosynthetic process	7	0.285016	0.0392083	ENSG00000006695, ENSG00000082641, ENSG00000144659, ENSG00000158578, ENSG00000080819, ENSG00000014919, ENSG00000188690
GOTERM_BP_DIRECT	GO:0006888~ER to Golgi vesicle-mediated transport	29	1.18078	0.040791	ENSG00000105402, ENSG00000054116, ENSG00000151150, ENSG00000107862, ENSG00000185825, ENSG00000074695, ENSG00000111481, ENSG00000077380, ENSG00000204843, ENSG00000029534, ENSG00000144043, ENSG00000196352, ENSG00000174851, ENSG00000134049, ENSG00000114988, ENSG00000105829, ENSG00000085063, ENSG00000149182, ENSG00000115216, ENSG00000101160, ENSG00000124164, ENSG00000093183, ENSG00000100568, ENSG0000…
GOTERM_BP_DIRECT	GO:1902775~mitochondrial large ribosomal subunit assembly	3	0.12215	0.0430323	ENSG00000118246, ENSG00000132153, ENSG00000182810
GOTERM_BP_DIRECT	GO:0002486~antigen processing and presentation of endogenous peptide antigen via MHC class I via ER pathway, TAP-independent	3	0.12215	0.0430323	ENSG00000204525, ENSG00000206503, ENSG00000234745
GOTERM_BP_DIRECT	GO:0030859~polarized epithelial cell differentiation	3	0.12215	0.0430323	ENSG00000151208, ENSG00000084733, ENSG00000073282
GOTERM_BP_DIRECT	GO:0070434~positive regulation of nucleotide-binding oligomerization domain containing 2 signaling pathway	3	0.12215	0.0430323	ENSG00000136869, ENSG00000204388, ENSG00000204389
GOTERM_BP_DIRECT	GO:0019254~carnitine metabolic process, CoA-linked	3	0.12215	0.0430323	ENSG00000115361, ENSG00000095321, ENSG00000117054
GOTERM_BP_DIRECT	GO:0007029~endoplasmic reticulum organization	8	0.325733	0.0440218	ENSG00000172071, ENSG00000114988, ENSG00000143318, ENSG00000136816, ENSG00000074695, ENSG00000113734, ENSG00000124164, ENSG00000169905
GOTERM_BP_DIRECT	GO:0051646~mitochondrion localization	4	0.162866	0.0463887	ENSG00000116688, ENSG00000072518, ENSG00000214456, ENSG00000188906
GOTERM_BP_DIRECT	GO:0014883~transition between fast and slow fiber	4	0.162866	0.0463887	ENSG00000159173, ENSG00000105048, ENSG00000114854, ENSG00000248746
GOTERM_BP_DIRECT	GO:0046039~GTP metabolic process	4	0.162866	0.0463887	ENSG00000119729, ENSG00000147853, ENSG00000133805, ENSG00000188906
GOTERM_BP_DIRECT	GO:0014894~response to denervation involved in regulation of muscle adaptation	4	0.162866	0.0463887	ENSG00000156804, ENSG00000143318, ENSG00000122180, ENSG00000248746
GOTERM_BP_DIRECT	GO:1901029~negative regulation of mitochondrial outer membrane permeabilization involved in apoptotic signaling pathway	4	0.162866	0.0463887	ENSG00000005022, ENSG00000167315, ENSG00000204388, ENSG00000204389
GOTERM_BP_DIRECT	GO:0044539~long-chain fatty acid import	4	0.162866	0.0463887	ENSG00000135218, ENSG00000123983, ENSG00000121769, ENSG00000151726
GOTERM_BP_DIRECT	GO:0051402~neuron apoptotic process	9	0.36645	0.0466832	ENSG00000080815, ENSG00000111640, ENSG00000142192, ENSG00000145390, ENSG00000164885, ENSG00000073282, ENSG00000125952, ENSG00000176171, ENSG00000184047
GOTERM_BP_DIRECT	GO:0000079~regulation of cyclin-dependent protein serine/threonine kinase activity	10	0.407166	0.0479174	ENSG00000101391, ENSG00000164045, ENSG00000082258, ENSG00000100526, ENSG00000110768, ENSG00000197299, ENSG00000108100, ENSG00000124762, ENSG00000090061, ENSG00000123080
GOTERM_BP_DIRECT	GO:0048704~embryonic skeletal system morphogenesis	10	0.407166	0.0479174	ENSG00000106006, ENSG00000106004, ENSG00000105429, ENSG00000122592, ENSG00000075711, ENSG00000277258, ENSG00000126778, ENSG00000128709, ENSG00000173917, ENSG00000120093
GOTERM_BP_DIRECT	GO:0006509~membrane protein ectodomain proteolysis	7	0.285016	0.0483914	ENSG00000065675, ENSG00000080815, ENSG00000005206, ENSG00000173402, ENSG00000164307, ENSG00000205155, ENSG00000100345
GOTERM_BP_DIRECT	GO:0000717~nucleotide-excision repair, DNA duplex unwinding	7	0.285016	0.0483914	ENSG00000111358, ENSG00000145736, ENSG00000134574, ENSG00000163161, ENSG00000136936, ENSG00000110768, ENSG00000147400
KEGG_PATHWAY	hsa01100:Metabolic pathways	215	8.75407	9.50012e-07	ENSG00000123983, ENSG00000160688, ENSG00000165475, ENSG00000101333, ENSG00000167701, ENSG00000160883, ENSG00000188690, ENSG00000136699, ENSG00000063601, ENSG00000136877, ENSG00000197858, ENSG00000168282, ENSG00000168710, ENSG00000164708, ENSG00000008311, ENSG00000204370, ENSG00000062485, ENSG00000187733, ENSG00000070669, ENSG00000038210, ENSG00000242110, ENSG00000084754, ENSG00000075239, ENSG0000…
KEGG_PATHWAY	hsa01130:Biosynthesis of antibiotics	52	2.11726	7.51427e-06	ENSG00000081181, ENSG00000138796, ENSG00000116748, ENSG00000160883, ENSG00000111640, ENSG00000102144, ENSG00000008311, ENSG00000164708, ENSG00000204370, ENSG00000062485, ENSG00000182054, ENSG00000105552, ENSG00000106992, ENSG00000147383, ENSG00000117448, ENSG00000172340, ENSG00000243678, ENSG00000084754, ENSG00000075239, ENSG00000111275, ENSG00000131069, ENSG00000105953, ENSG00000111669, ENSG0000…
KEGG_PATHWAY	hsa04910:Insulin signaling pathway	38	1.54723	1.04917e-05	ENSG00000154415, ENSG00000119729, ENSG00000104365, ENSG00000132155, ENSG00000162409, ENSG00000160014, ENSG00000181929, ENSG00000156873, ENSG00000126934, ENSG00000076555, ENSG00000157764, ENSG00000160883, ENSG00000135930, ENSG00000114302, ENSG00000002330, ENSG00000132825, ENSG00000115592, ENSG00000175634, ENSG00000140992, ENSG00000109819, ENSG00000050748, ENSG00000141564, ENSG00000196396, ENSG0000…
KEGG_PATHWAY	hsa00500:Starch and sucrose metabolism	15	0.610749	2.88724e-05	ENSG00000068976, ENSG00000165434, ENSG00000104812, ENSG00000187733, ENSG00000237763, ENSG00000159399, ENSG00000160883, ENSG00000171298, ENSG00000114480, ENSG00000162688, ENSG00000243480, ENSG00000105220, ENSG00000240038, ENSG00000079739, ENSG00000174876
KEGG_PATHWAY	hsa01200:Carbon metabolism	31	1.26221	8.64454e-05	ENSG00000105953, ENSG00000111669, ENSG00000166411, ENSG00000167701, ENSG00000067225, ENSG00000160883, ENSG00000117054, ENSG00000111640, ENSG00000102144, ENSG00000082212, ENSG00000091483, ENSG00000105220, ENSG00000100412, ENSG00000139684, ENSG00000164708, ENSG00000138413, ENSG00000204370, ENSG00000062485, ENSG00000184207, ENSG00000151376, ENSG00000182054, ENSG00000092621, ENSG00000159399, ENSG0000…
KEGG_PATHWAY	hsa04919:Thyroid hormone signaling pathway	31	1.26221	0.000102979	ENSG00000140396, ENSG00000132155, ENSG00000126934, ENSG00000171720, ENSG00000101333, ENSG00000141027, ENSG00000168036, ENSG00000198523, ENSG00000002330, ENSG00000140992, ENSG00000136146, ENSG00000132681, ENSG00000051382, ENSG00000174775, ENSG00000018625, ENSG00000123836, ENSG00000090020, ENSG00000143171, ENSG00000005339, ENSG00000187091, ENSG00000126351, ENSG00000082701, ENSG00000169375, ENSG0000…
KEGG_PATHWAY	hsa04152:AMPK signaling pathway	32	1.30293	0.000160171	ENSG00000158571, ENSG00000135218, ENSG00000114268, ENSG00000162409, ENSG00000181929, ENSG00000116678, ENSG00000140992, ENSG00000175634, ENSG00000115592, ENSG00000109819, ENSG00000105568, ENSG00000159346, ENSG00000135341, ENSG00000141564, ENSG00000140443, ENSG00000051382, ENSG00000104812, ENSG00000103319, ENSG00000204673, ENSG00000113575, ENSG00000137713, ENSG00000123836, ENSG00000004660, ENSG0000…
KEGG_PATHWAY	hsa01230:Biosynthesis of amino acids	22	0.895765	0.000366017	ENSG00000081181, ENSG00000038274, ENSG00000111669, ENSG00000138413, ENSG00000164708, ENSG00000062485, ENSG00000135821, ENSG00000166411, ENSG00000167701, ENSG00000105552, ENSG00000182054, ENSG00000092621, ENSG00000067225, ENSG00000141959, ENSG00000111640, ENSG00000147224, ENSG00000102144, ENSG00000173599, ENSG00000116984, ENSG00000108515, ENSG00000126522, ENSG00000100412
KEGG_PATHWAY	hsa00051:Fructose and mannose metabolism	13	0.529316	0.000431777	ENSG00000085662, ENSG00000112699, ENSG00000158571, ENSG00000104522, ENSG00000114268, ENSG00000111669, ENSG00000157353, ENSG00000123836, ENSG00000138030, ENSG00000159399, ENSG00000160883, ENSG00000141959, ENSG00000132199
KEGG_PATHWAY	hsa04973:Carbohydrate digestion and absorption	15	0.610749	0.000596403	ENSG00000018625, ENSG00000137700, ENSG00000187733, ENSG00000237763, ENSG00000159399, ENSG00000160883, ENSG00000117461, ENSG00000143153, ENSG00000243480, ENSG00000132681, ENSG00000051382, ENSG00000240038, ENSG00000129244, ENSG00000101892, ENSG00000174876
KEGG_PATHWAY	hsa04066:HIF-1 signaling pathway	26	1.05863	0.00063156	ENSG00000072274, ENSG00000070808, ENSG00000126934, ENSG00000148660, ENSG00000005339, ENSG00000159399, ENSG00000160883, ENSG00000135930, ENSG00000027697, ENSG00000173039, ENSG00000111640, ENSG00000165168, ENSG00000175634, ENSG00000124181, ENSG00000152256, ENSG00000117461, ENSG00000091879, ENSG00000136869, ENSG00000140443, ENSG00000051382, ENSG00000108515, ENSG00000102755, ENSG00000124762, ENSG0000…
KEGG_PATHWAY	hsa04922:Glucagon signaling pathway	26	1.05863	0.000742447	ENSG00000158571, ENSG00000162409, ENSG00000160014, ENSG00000107758, ENSG00000181929, ENSG00000070808, ENSG00000156873, ENSG00000076555, ENSG00000148660, ENSG00000101333, ENSG00000067225, ENSG00000134333, ENSG00000123104, ENSG00000115592, ENSG00000109819, ENSG00000128272, ENSG00000068976, ENSG00000087460, ENSG00000164708, ENSG00000104812, ENSG00000221823, ENSG00000005339, ENSG00000164776, ENSG0000…
KEGG_PATHWAY	hsa05410:Hypertrophic cardiomyopathy (HCM)	22	0.895765	0.000790252	ENSG00000081248, ENSG00000111245, ENSG00000108878, ENSG00000162409, ENSG00000181929, ENSG00000159251, ENSG00000143549, ENSG00000163069, ENSG00000132470, ENSG00000160789, ENSG00000115592, ENSG00000114854, ENSG00000140416, ENSG00000173402, ENSG00000175084, ENSG00000131791, ENSG00000067191, ENSG00000198467, ENSG00000157445, ENSG00000132356, ENSG00000119699, ENSG00000102683
KEGG_PATHWAY	hsa04920:Adipocytokine signaling pathway	20	0.814332	0.00124381	ENSG00000065675, ENSG00000135218, ENSG00000123983, ENSG00000104365, ENSG00000162409, ENSG00000179295, ENSG00000181929, ENSG00000151726, ENSG00000116678, ENSG00000076555, ENSG00000143171, ENSG00000004660, ENSG00000173039, ENSG00000115592, ENSG00000050748, ENSG00000109819, ENSG00000159346, ENSG00000006831, ENSG00000131791, ENSG00000132356
KEGG_PATHWAY	hsa00562:Inositol phosphate metabolism	20	0.814332	0.00149465	ENSG00000276293, ENSG00000111669, ENSG00000171100, ENSG00000107789, ENSG00000101333, ENSG00000186111, ENSG00000127080, ENSG00000187091, ENSG00000102043, ENSG00000143398, ENSG00000155252, ENSG00000109452, ENSG00000281028, ENSG00000038210, ENSG00000124181, ENSG00000086544, ENSG00000063601, ENSG00000104331, ENSG00000051382, ENSG00000068383, ENSG00000133731
KEGG_PATHWAY	hsa04261:Adrenergic signaling in cardiomyocytes	33	1.34365	0.00199652	ENSG00000081248, ENSG00000108878, ENSG00000160014, ENSG00000070808, ENSG00000148660, ENSG00000101333, ENSG00000198523, ENSG00000105711, ENSG00000105568, ENSG00000128272, ENSG00000132681, ENSG00000051382, ENSG00000067191, ENSG00000135447, ENSG00000067842, ENSG00000111245, ENSG00000087460, ENSG00000018625, ENSG00000159251, ENSG00000143549, ENSG00000113575, ENSG00000137713, ENSG00000090020, ENSG0000…
KEGG_PATHWAY	hsa04931:Insulin resistance	26	1.05863	0.00276581	ENSG00000135218, ENSG00000071242, ENSG00000065675, ENSG00000154415, ENSG00000104365, ENSG00000162409, ENSG00000181929, ENSG00000076555, ENSG00000173039, ENSG00000132825, ENSG00000115592, ENSG00000175634, ENSG00000140992, ENSG00000050748, ENSG00000109819, ENSG00000108788, ENSG00000196396, ENSG00000051382, ENSG00000068976, ENSG00000179295, ENSG00000104812, ENSG00000082701, ENSG00000160741, ENSG0000…
KEGG_PATHWAY	hsa04070:Phosphatidylinositol signaling system	24	0.977199	0.00333393	ENSG00000160014, ENSG00000171100, ENSG00000101333, ENSG00000065357, ENSG00000155252, ENSG00000123104, ENSG00000109452, ENSG00000281028, ENSG00000063601, ENSG00000051382, ENSG00000068383, ENSG00000276293, ENSG00000149091, ENSG00000186111, ENSG00000127080, ENSG00000187091, ENSG00000102043, ENSG00000143398, ENSG00000038210, ENSG00000124181, ENSG00000117461, ENSG00000086544, ENSG00000104331, ENSG0000…
KEGG_PATHWAY	hsa00620:Pyruvate metabolism	13	0.529316	0.00394507	ENSG00000076555, ENSG00000151376, ENSG00000067225, ENSG00000063854, ENSG00000134333, ENSG00000173599, ENSG00000082212, ENSG00000091483, ENSG00000075239, ENSG00000111275, ENSG00000166816, ENSG00000137106, ENSG00000131069
KEGG_PATHWAY	hsa05213:Endometrial cancer	15	0.610749	0.00568698	ENSG00000044115, ENSG00000132155, ENSG00000126934, ENSG00000166333, ENSG00000157764, ENSG00000168036, ENSG00000002330, ENSG00000082701, ENSG00000140992, ENSG00000117461, ENSG00000148737, ENSG00000213281, ENSG00000051382, ENSG00000141736, ENSG00000174775
KEGG_PATHWAY	hsa04150:mTOR signaling pathway	16	0.651466	0.00641749	ENSG00000071242, ENSG00000104365, ENSG00000162409, ENSG00000204673, ENSG00000167965, ENSG00000157764, ENSG00000135930, ENSG00000175634, ENSG00000140992, ENSG00000117461, ENSG00000141564, ENSG00000083290, ENSG00000025039, ENSG00000051382, ENSG00000154229, ENSG00000132356
KEGG_PATHWAY	hsa01212:Fatty acid metabolism	14	0.570033	0.007184	ENSG00000123983, ENSG00000138796, ENSG00000115361, ENSG00000151726, ENSG00000072778, ENSG00000196177, ENSG00000117054, ENSG00000134824, ENSG00000138029, ENSG00000167315, ENSG00000084754, ENSG00000075239, ENSG00000165996, ENSG00000157184
KEGG_PATHWAY	hsa00510:N-Glycan biosynthesis	14	0.570033	0.00863725	ENSG00000111885, ENSG00000168282, ENSG00000161013, ENSG00000115275, ENSG00000101901, ENSG00000163902, ENSG00000131446, ENSG00000129562, ENSG00000196547, ENSG00000120697, ENSG00000172269, ENSG00000244038, ENSG00000179085, ENSG00000253710
KEGG_PATHWAY	hsa05215:Prostate cancer	21	0.855049	0.00867049	ENSG00000132155, ENSG00000104365, ENSG00000169083, ENSG00000126934, ENSG00000005339, ENSG00000157764, ENSG00000168036, ENSG00000173039, ENSG00000002330, ENSG00000082701, ENSG00000096384, ENSG00000140992, ENSG00000117461, ENSG00000128272, ENSG00000148737, ENSG00000140443, ENSG00000213281, ENSG00000051382, ENSG00000124762, ENSG00000174775, ENSG00000141736
KEGG_PATHWAY	hsa00071:Fatty acid degradation	13	0.529316	0.00908348	ENSG00000138796, ENSG00000123983, ENSG00000115361, ENSG00000151726, ENSG00000072778, ENSG00000196177, ENSG00000117054, ENSG00000138029, ENSG00000167315, ENSG00000084754, ENSG00000075239, ENSG00000111275, ENSG00000157184
KEGG_PATHWAY	hsa05203:Viral carcinogenesis	40	1.62866	0.00943848	ENSG00000111358, ENSG00000147099, ENSG00000273542, ENSG00000110768, ENSG00000171720, ENSG00000112592, ENSG00000234745, ENSG00000067225, ENSG00000173039, ENSG00000134352, ENSG00000002330, ENSG00000204525, ENSG00000166913, ENSG00000128272, ENSG00000145604, ENSG00000077522, ENSG00000051382, ENSG00000124762, ENSG00000183474, ENSG00000174775, ENSG00000204642, ENSG00000162889, ENSG00000203814, ENSG0000…
KEGG_PATHWAY	hsa04720:Long-term potentiation	17	0.692182	0.00959971	ENSG00000071242, ENSG00000132155, ENSG00000160014, ENSG00000107758, ENSG00000070808, ENSG00000126934, ENSG00000148660, ENSG00000221823, ENSG00000101333, ENSG00000005339, ENSG00000157764, ENSG00000123104, ENSG00000128272, ENSG00000213281, ENSG00000154229, ENSG00000174775, ENSG00000135447
KEGG_PATHWAY	hsa04141:Protein processing in endoplasmic reticulum	34	1.38436	0.0110489	ENSG00000163479, ENSG00000184787, ENSG00000074695, ENSG00000185825, ENSG00000129562, ENSG00000050748, ENSG00000109332, ENSG00000244038, ENSG00000128272, ENSG00000204388, ENSG00000151092, ENSG00000014216, ENSG00000204389, ENSG00000145495, ENSG00000111885, ENSG00000116044, ENSG00000135924, ENSG00000138942, ENSG00000115275, ENSG00000198168, ENSG00000160087, ENSG00000163902, ENSG00000112208, ENSG0000…
KEGG_PATHWAY	hsa00020:Citrate cycle (TCA cycle)	10	0.407166	0.0119817	ENSG00000105953, ENSG00000138413, ENSG00000204370, ENSG00000062485, ENSG00000173599, ENSG00000166411, ENSG00000182054, ENSG00000091483, ENSG00000100412, ENSG00000172340
KEGG_PATHWAY	hsa03015:mRNA surveillance pathway	21	0.855049	0.0125952	ENSG00000169062, ENSG00000150459, ENSG00000111880, ENSG00000205937, ENSG00000116698, ENSG00000113575, ENSG00000100813, ENSG00000137713, ENSG00000125351, ENSG00000152684, ENSG00000151461, ENSG00000090060, ENSG00000071626, ENSG00000164091, ENSG00000066027, ENSG00000090621, ENSG00000105568, ENSG00000162231, ENSG00000198952, ENSG00000115421, ENSG00000265241
KEGG_PATHWAY	hsa04921:Oxytocin signaling pathway	32	1.30293	0.0126294	ENSG00000081248, ENSG00000145949, ENSG00000132155, ENSG00000108878, ENSG00000196465, ENSG00000162409, ENSG00000160014, ENSG00000181929, ENSG00000107758, ENSG00000126934, ENSG00000070808, ENSG00000148660, ENSG00000101333, ENSG00000116741, ENSG00000123104, ENSG00000134318, ENSG00000115592, ENSG00000051382, ENSG00000067191, ENSG00000124762, ENSG00000174775, ENSG00000087460, ENSG00000077157, ENSG0000…
KEGG_PATHWAY	hsa04068:FoxO signaling pathway	28	1.14007	0.0136447	ENSG00000104365, ENSG00000132155, ENSG00000162409, ENSG00000181929, ENSG00000126934, ENSG00000157764, ENSG00000121858, ENSG00000184481, ENSG00000103942, ENSG00000156804, ENSG00000115592, ENSG00000140992, ENSG00000050748, ENSG00000145604, ENSG00000152413, ENSG00000140443, ENSG00000051382, ENSG00000124762, ENSG00000176171, ENSG00000119699, ENSG00000174775, ENSG00000005339, ENSG00000117461, ENSG0000…
KEGG_PATHWAY	hsa00280:Valine, leucine and isoleucine degradation	13	0.529316	0.0155593	ENSG00000138796, ENSG00000183044, ENSG00000105552, ENSG00000196177, ENSG00000117054, ENSG00000072506, ENSG00000138029, ENSG00000083720, ENSG00000167315, ENSG00000137992, ENSG00000084754, ENSG00000075239, ENSG00000111275
KEGG_PATHWAY	hsa01210:2-Oxocarboxylic acid metabolism	7	0.285016	0.0170611	ENSG00000138413, ENSG00000062485, ENSG00000166411, ENSG00000167701, ENSG00000105552, ENSG00000182054, ENSG00000100412
KEGG_PATHWAY	hsa05168:Herpes simplex infection	35	1.42508	0.0205883	ENSG00000161547, ENSG00000104365, ENSG00000111786, ENSG00000116350, ENSG00000198502, ENSG00000112592, ENSG00000234745, ENSG00000173039, ENSG00000204525, ENSG00000050748, ENSG00000105397, ENSG00000162231, ENSG00000099804, ENSG00000135341, ENSG00000111727, ENSG00000187325, ENSG00000145604, ENSG00000136450, ENSG00000204642, ENSG00000204632, ENSG00000196126, ENSG00000204592, ENSG00000179295, ENSG0000…
KEGG_PATHWAY	hsa04730:Long-term depression	15	0.610749	0.0206222	ENSG00000087460, ENSG00000132155, ENSG00000185532, ENSG00000089250, ENSG00000126934, ENSG00000113575, ENSG00000137713, ENSG00000101333, ENSG00000157764, ENSG00000123104, ENSG00000105568, ENSG00000140443, ENSG00000213281, ENSG00000154229, ENSG00000174775
KEGG_PATHWAY	hsa05414:Dilated cardiomyopathy	19	0.773616	0.0222316	ENSG00000081248, ENSG00000111245, ENSG00000087460, ENSG00000108878, ENSG00000159251, ENSG00000143549, ENSG00000163069, ENSG00000198523, ENSG00000132470, ENSG00000160789, ENSG00000114854, ENSG00000140416, ENSG00000173402, ENSG00000175084, ENSG00000067191, ENSG00000198467, ENSG00000157445, ENSG00000119699, ENSG00000102683
KEGG_PATHWAY	hsa00640:Propanoate metabolism	9	0.36645	0.0234704	ENSG00000134333, ENSG00000183044, ENSG00000084754, ENSG00000076555, ENSG00000075239, ENSG00000172340, ENSG00000117054, ENSG00000111058, ENSG00000131069
KEGG_PATHWAY	hsa03013:RNA transport	33	1.34365	0.0237359	ENSG00000205937, ENSG00000172336, ENSG00000105171, ENSG00000130811, ENSG00000151461, ENSG00000074201, ENSG00000046647, ENSG00000135930, ENSG00000113569, ENSG00000163002, ENSG00000158417, ENSG00000131652, ENSG00000090621, ENSG00000162231, ENSG00000141642, ENSG00000265241, ENSG00000114867, ENSG00000145191, ENSG00000169062, ENSG00000150459, ENSG00000100813, ENSG00000125351, ENSG00000163634, ENSG0000…
KEGG_PATHWAY	hsa00010:Glycolysis / Gluconeogenesis	16	0.651466	0.0242695	ENSG00000111669, ENSG00000164708, ENSG00000107789, ENSG00000067225, ENSG00000117448, ENSG00000159399, ENSG00000160883, ENSG00000141959, ENSG00000134333, ENSG00000111640, ENSG00000102144, ENSG00000105220, ENSG00000108515, ENSG00000111275, ENSG00000079739, ENSG00000131069
KEGG_PATHWAY	hsa04144:Endocytosis	46	1.87296	0.0251168	ENSG00000084070, ENSG00000072274, ENSG00000116675, ENSG00000181852, ENSG00000028528, ENSG00000170759, ENSG00000107862, ENSG00000165457, ENSG00000157077, ENSG00000234745, ENSG00000198898, ENSG00000167987, ENSG00000077549, ENSG00000136717, ENSG00000204525, ENSG00000138592, ENSG00000042753, ENSG00000182578, ENSG00000204388, ENSG00000140443, ENSG00000204389, ENSG00000204642, ENSG00000119699, ENSG0000…
KEGG_PATHWAY	hsa04960:Aldosterone-regulated sodium reabsorption	11	0.447883	0.0253635	ENSG00000049759, ENSG00000140992, ENSG00000018625, ENSG00000117461, ENSG00000143153, ENSG00000132681, ENSG00000051382, ENSG00000154229, ENSG00000129244, ENSG00000118515, ENSG00000101892
KEGG_PATHWAY	hsa03022:Basal transcription factors	12	0.488599	0.0274617	ENSG00000122728, ENSG00000111358, ENSG00000145736, ENSG00000165417, ENSG00000197780, ENSG00000147133, ENSG00000163161, ENSG00000110768, ENSG00000064995, ENSG00000187325, ENSG00000112592, ENSG00000183474
KEGG_PATHWAY	hsa04012:ErbB signaling pathway	19	0.773616	0.0308774	ENSG00000132155, ENSG00000169752, ENSG00000070808, ENSG00000126934, ENSG00000148660, ENSG00000157764, ENSG00000002330, ENSG00000082701, ENSG00000071051, ENSG00000175634, ENSG00000050748, ENSG00000124181, ENSG00000117461, ENSG00000213281, ENSG00000051382, ENSG00000124762, ENSG00000154229, ENSG00000141736, ENSG00000174775
KEGG_PATHWAY	hsa04530:Tight junction	27	1.09935	0.0310806	ENSG00000118680, ENSG00000065675, ENSG00000078814, ENSG00000168036, ENSG00000072415, ENSG00000105568, ENSG00000091436, ENSG00000077522, ENSG00000166025, ENSG00000060138, ENSG00000116539, ENSG00000104067, ENSG00000180209, ENSG00000174775, ENSG00000133026, ENSG00000044115, ENSG00000111245, ENSG00000113575, ENSG00000137713, ENSG00000163347, ENSG00000105357, ENSG00000148498, ENSG00000213281, ENSG0000…
KEGG_PATHWAY	hsa04260:Cardiac muscle contraction	17	0.692182	0.0311739	ENSG00000081248, ENSG00000111245, ENSG00000108878, ENSG00000018625, ENSG00000159251, ENSG00000143549, ENSG00000090020, ENSG00000114854, ENSG00000143153, ENSG00000132681, ENSG00000140416, ENSG00000067191, ENSG00000157445, ENSG00000198467, ENSG00000129244, ENSG00000101892, ENSG00000115944
KEGG_PATHWAY	hsa05230:Central carbon metabolism in cancer	15	0.610749	0.0347265	ENSG00000132155, ENSG00000164708, ENSG00000126934, ENSG00000067225, ENSG00000159399, ENSG00000160883, ENSG00000141959, ENSG00000152256, ENSG00000117461, ENSG00000157404, ENSG00000213281, ENSG00000051382, ENSG00000174775, ENSG00000141736, ENSG00000100644
KEGG_PATHWAY	hsa04722:Neurotrophin signaling pathway	24	0.977199	0.0369179	ENSG00000071242, ENSG00000080815, ENSG00000107263, ENSG00000132155, ENSG00000104365, ENSG00000160014, ENSG00000179295, ENSG00000070808, ENSG00000126934, ENSG00000148660, ENSG00000157764, ENSG00000173039, ENSG00000002330, ENSG00000082701, ENSG00000166225, ENSG00000140992, ENSG00000050748, ENSG00000124181, ENSG00000117461, ENSG00000128272, ENSG00000213281, ENSG00000051382, ENSG00000174775, ENSG0000…
KEGG_PATHWAY	hsa00520:Amino sugar and nucleotide sugar metabolism	12	0.488599	0.0425326	ENSG00000112699, ENSG00000104522, ENSG00000115652, ENSG00000157353, ENSG00000100522, ENSG00000117308, ENSG00000105220, ENSG00000113552, ENSG00000160883, ENSG00000159399, ENSG00000079739, ENSG00000162066
KEGG_PATHWAY	hsa04660:T cell receptor signaling pathway	21	0.855049	0.0437762	ENSG00000065675, ENSG00000132155, ENSG00000104365, ENSG00000107758, ENSG00000126934, ENSG00000221823, ENSG00000134215, ENSG00000172175, ENSG00000173039, ENSG00000198851, ENSG00000082701, ENSG00000071051, ENSG00000140992, ENSG00000124181, ENSG00000117461, ENSG00000135341, ENSG00000075711, ENSG00000213281, ENSG00000198821, ENSG00000051382, ENSG00000174775

## Sheet: Table S5
Table S5: Gene ontology and pathway analysis of differentially expressed PTGs(DEPTGs) of DELs
Category	Term	Count	%	PValue	Genes
GOTERM_BP_DIRECT	GO:0006094~gluconeogenesis	9	3.2967	1.40426e-07	ENSG00000158571, ENSG00000111669, ENSG00000115159, ENSG00000164708, ENSG00000102144, ENSG00000128272, ENSG00000105220, ENSG00000004864, ENSG00000079739
GOTERM_BP_DIRECT	GO:0006096~glycolytic process	8	2.9304	3.5387e-07	ENSG00000158571, ENSG00000141959, ENSG00000134333, ENSG00000111669, ENSG00000164708, ENSG00000102144, ENSG00000105220, ENSG00000079739
GOTERM_BP_DIRECT	GO:0005975~carbohydrate metabolic process	14	5.12821	9.57205e-07	ENSG00000085662, ENSG00000154330, ENSG00000187733, ENSG00000237763, ENSG00000164776, ENSG00000176920, ENSG00000134333, ENSG00000140557, ENSG00000243480, ENSG00000105220, ENSG00000111275, ENSG00000240038, ENSG00000079739, ENSG00000174876
GOTERM_BP_DIRECT	GO:0061621~canonical glycolysis	7	2.5641	1.22127e-06	ENSG00000158571, ENSG00000141959, ENSG00000111669, ENSG00000164708, ENSG00000102144, ENSG00000105220, ENSG00000067225
GOTERM_BP_DIRECT	GO:0055003~cardiac myofibril assembly	5	1.8315	1.63858e-05	ENSG00000111245, ENSG00000129170, ENSG00000159251, ENSG00000134775, ENSG00000133026
GOTERM_BP_DIRECT	GO:0006584~catecholamine metabolic process	4	1.4652	0.000208275	ENSG00000213648, ENSG00000261052, ENSG00000197165, ENSG00000196502
GOTERM_BP_DIRECT	GO:0090084~negative regulation of inclusion body assembly	4	1.4652	0.000294491	ENSG00000132002, ENSG00000140403, ENSG00000204388, ENSG00000204389
GOTERM_BP_DIRECT	GO:0060048~cardiac muscle contraction	6	2.1978	0.000382934	ENSG00000111245, ENSG00000159173, ENSG00000129170, ENSG00000159251, ENSG00000143153, ENSG00000118729
GOTERM_BP_DIRECT	GO:0051923~sulfation	4	1.4652	0.000400783	ENSG00000213648, ENSG00000261052, ENSG00000197165, ENSG00000196502
GOTERM_BP_DIRECT	GO:0005978~glycogen biosynthetic process	5	1.8315	0.000424812	ENSG00000114480, ENSG00000154330, ENSG00000164776, ENSG00000079739, ENSG00000117054
GOTERM_BP_DIRECT	GO:0032781~positive regulation of ATPase activity	5	1.8315	0.000846838	ENSG00000132002, ENSG00000143153, ENSG00000168259, ENSG00000129244, ENSG00000070087
GOTERM_BP_DIRECT	GO:0046034~ATP metabolic process	5	1.8315	0.000957375	ENSG00000148339, ENSG00000143153, ENSG00000204388, ENSG00000106992, ENSG00000204389
GOTERM_BP_DIRECT	GO:1903779~regulation of cardiac conduction	6	2.1978	0.0010581	ENSG00000143153, ENSG00000132681, ENSG00000118729, ENSG00000187486, ENSG00000129244, ENSG00000198523
GOTERM_BP_DIRECT	GO:0050427~3'-phosphoadenosine 5'-phosphosulfate metabolic process	4	1.4652	0.00106074	ENSG00000213648, ENSG00000261052, ENSG00000197165, ENSG00000196502
GOTERM_BP_DIRECT	GO:0030049~muscle filament sliding	5	1.8315	0.00184158	ENSG00000111245, ENSG00000159173, ENSG00000159251, ENSG00000077522, ENSG00000248746
GOTERM_BP_DIRECT	GO:0033539~fatty acid beta-oxidation using acyl-CoA dehydrogenase	4	1.4652	0.00184479	ENSG00000115361, ENSG00000072778, ENSG00000171503, ENSG00000117054
GOTERM_BP_DIRECT	GO:0009749~response to glucose	6	2.1978	0.00252473	ENSG00000141959, ENSG00000134333, ENSG00000265972, ENSG00000135821, ENSG00000119927, ENSG00000137700
GOTERM_BP_DIRECT	GO:1901018~positive regulation of potassium ion transmembrane transporter activity	3	1.0989	0.00277189	ENSG00000077522, ENSG00000143153, ENSG00000129244
GOTERM_BP_DIRECT	GO:0008202~steroid metabolic process	5	1.8315	0.00291704	ENSG00000213648, ENSG00000261052, ENSG00000197165, ENSG00000137700, ENSG00000196502
GOTERM_BP_DIRECT	GO:0006635~fatty acid beta-oxidation	5	1.8315	0.00317432	ENSG00000115361, ENSG00000084754, ENSG00000072778, ENSG00000117054, ENSG00000157184
GOTERM_BP_DIRECT	GO:0006090~pyruvate metabolic process	4	1.4652	0.00334219	ENSG00000134333, ENSG00000155380, ENSG00000082212, ENSG00000151376
GOTERM_BP_DIRECT	GO:0055114~oxidation-reduction process	18	6.59341	0.00378798	ENSG00000085662, ENSG00000115159, ENSG00000112992, ENSG00000115361, ENSG00000203797, ENSG00000205678, ENSG00000140043, ENSG00000133816, ENSG00000151376, ENSG00000080819, ENSG00000123131, ENSG00000117054, ENSG00000090013, ENSG00000134333, ENSG00000116157, ENSG00000082212, ENSG00000119471, ENSG00000116133
GOTERM_BP_DIRECT	GO:0045662~negative regulation of myoblast differentiation	4	1.4652	0.00380452	ENSG00000165887, ENSG00000129170, ENSG00000138379, ENSG00000135111
GOTERM_BP_DIRECT	GO:2001259~positive regulation of cation channel activity	3	1.0989	0.00384521	ENSG00000151150, ENSG00000077522, ENSG00000187486
GOTERM_BP_DIRECT	GO:0098609~cell-cell adhesion	11	4.0293	0.00467711	ENSG00000134333, ENSG00000132002, ENSG00000077549, ENSG00000138413, ENSG00000107438, ENSG00000138363, ENSG00000180611, ENSG00000146376, ENSG00000204389, ENSG00000067225, ENSG00000120802
GOTERM_BP_DIRECT	GO:0009812~flavonoid metabolic process	3	1.0989	0.00508019	ENSG00000213648, ENSG00000261052, ENSG00000196502
GOTERM_BP_DIRECT	GO:0090281~negative regulation of calcium ion import	3	1.0989	0.00508019	ENSG00000170385, ENSG00000170290, ENSG00000198523
GOTERM_BP_DIRECT	GO:0006942~regulation of striated muscle contraction	3	1.0989	0.00647216	ENSG00000111245, ENSG00000133055, ENSG00000159173
GOTERM_BP_DIRECT	GO:0010107~potassium ion import	4	1.4652	0.00668849	ENSG00000143153, ENSG00000132681, ENSG00000187486, ENSG00000129244
GOTERM_BP_DIRECT	GO:0045214~sarcomere organization	4	1.4652	0.00738486	ENSG00000077522, ENSG00000118729, ENSG00000134775, ENSG00000170807
GOTERM_BP_DIRECT	GO:0005977~glycogen metabolic process	4	1.4652	0.00738486	ENSG00000114480, ENSG00000132825, ENSG00000137700, ENSG00000135447
GOTERM_BP_DIRECT	GO:0043267~negative regulation of potassium ion transport	3	1.0989	0.00801658	ENSG00000077522, ENSG00000128272, ENSG00000118729
GOTERM_BP_DIRECT	GO:0036376~sodium ion export from cell	3	1.0989	0.00801658	ENSG00000143153, ENSG00000132681, ENSG00000129244
GOTERM_BP_DIRECT	GO:0033574~response to testosterone	4	1.4652	0.00812256	ENSG00000138379, ENSG00000105220, ENSG00000187486, ENSG00000198523
GOTERM_BP_DIRECT	GO:0019674~NAD metabolic process	3	1.0989	0.00970897	ENSG00000134333, ENSG00000173614, ENSG00000163864
GOTERM_BP_DIRECT	GO:0010941~regulation of cell death	3	1.0989	0.00970897	ENSG00000109846, ENSG00000204388, ENSG00000204389
GOTERM_BP_DIRECT	GO:0030007~cellular potassium ion homeostasis	3	1.0989	0.011545	ENSG00000143153, ENSG00000132681, ENSG00000129244
GOTERM_BP_DIRECT	GO:0010248~establishment or maintenance of transmembrane electrochemical gradient	3	1.0989	0.0135203	ENSG00000143153, ENSG00000132681, ENSG00000129244
GOTERM_BP_DIRECT	GO:0006941~striated muscle contraction	3	1.0989	0.0135203	ENSG00000164708, ENSG00000091482, ENSG00000118729
GOTERM_BP_DIRECT	GO:0032868~response to insulin	5	1.8315	0.0140051	ENSG00000158571, ENSG00000121769, ENSG00000084754, ENSG00000067225, ENSG00000198523
GOTERM_BP_DIRECT	GO:0006006~glucose metabolic process	5	1.8315	0.0140051	ENSG00000152256, ENSG00000154330, ENSG00000137700, ENSG00000187486, ENSG00000079739
GOTERM_BP_DIRECT	GO:0055088~lipid homeostasis	4	1.4652	0.0166933	ENSG00000115361, ENSG00000177666, ENSG00000072778, ENSG00000117054
GOTERM_BP_DIRECT	GO:0042026~protein refolding	3	1.0989	0.0178724	ENSG00000140403, ENSG00000204388, ENSG00000204389
GOTERM_BP_DIRECT	GO:1900034~regulation of cellular response to heat	5	1.8315	0.0203962	ENSG00000132002, ENSG00000109846, ENSG00000204388, ENSG00000204389, ENSG00000168259
GOTERM_BP_DIRECT	GO:0043086~negative regulation of catalytic activity	5	1.8315	0.0203962	ENSG00000265972, ENSG00000076555, ENSG00000128989, ENSG00000170290, ENSG00000198523
GOTERM_BP_DIRECT	GO:1904722~positive regulation of mRNA endonucleolytic cleavage involved in unfolded protein response	2	0.732601	0.0275596	ENSG00000204388, ENSG00000204389
GOTERM_BP_DIRECT	GO:1902380~positive regulation of endoribonuclease activity	2	0.732601	0.0275596	ENSG00000204388, ENSG00000204389
GOTERM_BP_DIRECT	GO:1901894~regulation of calcium-transporting ATPase activity	2	0.732601	0.0275596	ENSG00000170290, ENSG00000198523
GOTERM_BP_DIRECT	GO:1901877~negative regulation of calcium ion binding	2	0.732601	0.0275596	ENSG00000170290, ENSG00000198523
GOTERM_BP_DIRECT	GO:0002026~regulation of the force of heart contraction	3	1.0989	0.0280702	ENSG00000111245, ENSG00000129170, ENSG00000198523
GOTERM_BP_DIRECT	GO:0006883~cellular sodium ion homeostasis	3	1.0989	0.0280702	ENSG00000143153, ENSG00000132681, ENSG00000129244
GOTERM_BP_DIRECT	GO:0007519~skeletal muscle tissue development	4	1.4652	0.0337235	ENSG00000129170, ENSG00000179456, ENSG00000107954, ENSG00000128709
GOTERM_BP_DIRECT	GO:0005980~glycogen catabolic process	3	1.0989	0.0338551	ENSG00000118804, ENSG00000164776, ENSG00000079739
GOTERM_BP_DIRECT	GO:0007517~muscle organ development	5	1.8315	0.0353311	ENSG00000165887, ENSG00000109846, ENSG00000138379, ENSG00000183386, ENSG00000147166
GOTERM_BP_DIRECT	GO:0006874~cellular calcium ion homeostasis	5	1.8315	0.0405068	ENSG00000170385, ENSG00000129170, ENSG00000137700, ENSG00000143153, ENSG00000198523
GOTERM_BP_DIRECT	GO:1901020~negative regulation of calcium ion transmembrane transporter activity	2	0.732601	0.0410544	ENSG00000170290, ENSG00000198523
GOTERM_BP_DIRECT	GO:0006740~NADPH regeneration	2	0.732601	0.0410544	ENSG00000112992, ENSG00000138413
GOTERM_BP_DIRECT	GO:1901077~regulation of relaxation of muscle	2	0.732601	0.0410544	ENSG00000170290, ENSG00000198523
GOTERM_BP_DIRECT	GO:0070434~positive regulation of nucleotide-binding oligomerization domain containing 2 signaling pathway	2	0.732601	0.0410544	ENSG00000204388, ENSG00000204389
GOTERM_BP_DIRECT	GO:0034628~'de novo' NAD biosynthetic process from aspartate	2	0.732601	0.0410544	ENSG00000173614, ENSG00000163864
GOTERM_BP_DIRECT	GO:0019254~carnitine metabolic process, CoA-linked	2	0.732601	0.0410544	ENSG00000115361, ENSG00000117054
GOTERM_BP_DIRECT	GO:1903288~positive regulation of potassium ion import	2	0.732601	0.0410544	ENSG00000143153, ENSG00000129244
GOTERM_BP_DIRECT	GO:0019915~lipid storage	3	1.0989	0.0433094	ENSG00000147872, ENSG00000177666, ENSG00000214456
GOTERM_BP_DIRECT	GO:0007050~cell cycle arrest	6	2.1978	0.0468427	ENSG00000071246, ENSG00000091436, ENSG00000116133, ENSG00000106992, ENSG00000123080, ENSG00000174775
GOTERM_BP_DIRECT	GO:0036498~IRE1-mediated unfolded protein response	4	1.4652	0.0486126	ENSG00000213648, ENSG00000261052, ENSG00000072778, ENSG00000070540
KEGG_PATHWAY	hsa04973:Carbohydrate digestion and absorption	9	3.2967	6.45629e-07	ENSG00000137700, ENSG00000143153, ENSG00000237763, ENSG00000187733, ENSG00000243480, ENSG00000132681, ENSG00000240038, ENSG00000129244, ENSG00000174876
KEGG_PATHWAY	hsa01130:Biosynthesis of antibiotics	17	6.22711	1.13204e-06	ENSG00000111669, ENSG00000164708, ENSG00000138413, ENSG00000116748, ENSG00000138363, ENSG00000106992, ENSG00000067225, ENSG00000146070, ENSG00000117054, ENSG00000141959, ENSG00000134333, ENSG00000102144, ENSG00000137992, ENSG00000084754, ENSG00000105220, ENSG00000111275, ENSG00000079739
KEGG_PATHWAY	hsa00500:Starch and sucrose metabolism	8	2.9304	1.54813e-06	ENSG00000114480, ENSG00000237763, ENSG00000187733, ENSG00000243480, ENSG00000105220, ENSG00000240038, ENSG00000079739, ENSG00000174876
KEGG_PATHWAY	hsa01100:Metabolic pathways	44	16.1172	5.13129e-06	ENSG00000116981, ENSG00000111669, ENSG00000112992, ENSG00000115361, ENSG00000116748, ENSG00000076555, ENSG00000138363, ENSG00000237763, ENSG00000067225, ENSG00000146070, ENSG00000117054, ENSG00000134333, ENSG00000114480, ENSG00000102144, ENSG00000086205, ENSG00000177666, ENSG00000105220, ENSG00000163864, ENSG00000079739, ENSG00000174876, ENSG00000085662, ENSG00000135845, ENSG00000173614, ENSG0000…
KEGG_PATHWAY	hsa01200:Carbon metabolism	12	4.3956	5.3247e-06	ENSG00000141959, ENSG00000139684, ENSG00000111669, ENSG00000164708, ENSG00000138413, ENSG00000102144, ENSG00000084754, ENSG00000082212, ENSG00000151376, ENSG00000105220, ENSG00000067225, ENSG00000117054
KEGG_PATHWAY	hsa00010:Glycolysis / Gluconeogenesis	9	3.2967	2.44412e-05	ENSG00000141959, ENSG00000134333, ENSG00000111669, ENSG00000164708, ENSG00000102144, ENSG00000105220, ENSG00000067225, ENSG00000111275, ENSG00000079739
KEGG_PATHWAY	hsa00620:Pyruvate metabolism	6	2.1978	0.000708426	ENSG00000134333, ENSG00000076555, ENSG00000082212, ENSG00000151376, ENSG00000067225, ENSG00000111275
KEGG_PATHWAY	hsa00071:Fatty acid degradation	6	2.1978	0.00110371	ENSG00000115361, ENSG00000084754, ENSG00000072778, ENSG00000111275, ENSG00000117054, ENSG00000157184
KEGG_PATHWAY	hsa04261:Adrenergic signaling in cardiomyocytes	10	3.663	0.00125074	ENSG00000111245, ENSG00000159251, ENSG00000113575, ENSG00000143153, ENSG00000128272, ENSG00000132681, ENSG00000154229, ENSG00000129244, ENSG00000198523, ENSG00000135447
KEGG_PATHWAY	hsa00640:Propanoate metabolism	5	1.8315	0.00149274	ENSG00000134333, ENSG00000084754, ENSG00000076555, ENSG00000117054, ENSG00000111058
KEGG_PATHWAY	hsa01212:Fatty acid metabolism	6	2.1978	0.00164285	ENSG00000115361, ENSG00000084754, ENSG00000072778, ENSG00000165996, ENSG00000117054, ENSG00000157184
KEGG_PATHWAY	hsa04922:Glucagon signaling pathway	8	2.9304	0.00201162	ENSG00000158571, ENSG00000134333, ENSG00000164708, ENSG00000076555, ENSG00000221823, ENSG00000128272, ENSG00000067225, ENSG00000164776
KEGG_PATHWAY	hsa01230:Biosynthesis of amino acids	7	2.5641	0.00210841	ENSG00000141959, ENSG00000111669, ENSG00000164708, ENSG00000138413, ENSG00000102144, ENSG00000135821, ENSG00000067225
KEGG_PATHWAY	hsa04918:Thyroid hormone synthesis	6	2.1978	0.00847351	ENSG00000116157, ENSG00000143153, ENSG00000128272, ENSG00000132681, ENSG00000154229, ENSG00000129244
KEGG_PATHWAY	hsa04530:Tight junction	8	2.9304	0.0118422	ENSG00000111245, ENSG00000113575, ENSG00000091436, ENSG00000077522, ENSG00000154229, ENSG00000248746, ENSG00000174775, ENSG00000133026
KEGG_PATHWAY	hsa00760:Nicotinate and nicotinamide metabolism	4	1.4652	0.0149865	ENSG00000116981, ENSG00000112992, ENSG00000173614, ENSG00000163864
KEGG_PATHWAY	hsa04919:Thyroid hormone signaling pathway	7	2.5641	0.0169447	ENSG00000136146, ENSG00000143153, ENSG00000132681, ENSG00000154229, ENSG00000129244, ENSG00000174775, ENSG00000198523
KEGG_PATHWAY	hsa00410:beta-Alanine metabolism	4	1.4652	0.017961	ENSG00000172508, ENSG00000084754, ENSG00000111275, ENSG00000117054
KEGG_PATHWAY	hsa04911:Insulin secretion	6	2.1978	0.0185549	ENSG00000143153, ENSG00000128272, ENSG00000132681, ENSG00000187486, ENSG00000154229, ENSG00000129244
KEGG_PATHWAY	hsa00051:Fructose and mannose metabolism	4	1.4652	0.0195626	ENSG00000158571, ENSG00000085662, ENSG00000141959, ENSG00000111669
KEGG_PATHWAY	hsa04730:Long-term depression	5	1.8315	0.022841	ENSG00000185532, ENSG00000113575, ENSG00000140443, ENSG00000154229, ENSG00000174775
KEGG_PATHWAY	hsa05230:Central carbon metabolism in cancer	5	1.8315	0.0281766	ENSG00000141959, ENSG00000164708, ENSG00000152256, ENSG00000067225, ENSG00000174775
KEGG_PATHWAY	hsa04720:Long-term potentiation	5	1.8315	0.0311003	ENSG00000221823, ENSG00000128272, ENSG00000154229, ENSG00000174775, ENSG00000135447
KEGG_PATHWAY	hsa04960:Aldosterone-regulated sodium reabsorption	4	1.4652	0.0329142	ENSG00000143153, ENSG00000132681, ENSG00000154229, ENSG00000129244
KEGG_PATHWAY	hsa04141:Protein processing in endoplasmic reticulum	8	2.9304	0.0331581	ENSG00000132002, ENSG00000078967, ENSG00000109846, ENSG00000198168, ENSG00000128272, ENSG00000204388, ENSG00000204389, ENSG00000145495
KEGG_PATHWAY	hsa04260:Cardiac muscle contraction	5	1.8315	0.0464044	ENSG00000111245, ENSG00000159251, ENSG00000143153, ENSG00000132681, ENSG00000129244
KEGG_PATHWAY	hsa04961:Endocrine and other factor-regulated calcium reabsorption	4	1.4652	0.0472984	ENSG00000143153, ENSG00000132681, ENSG00000154229, ENSG00000129244
KEGG_PATHWAY	hsa04978:Mineral absorption	4	1.4652	0.0499518	ENSG00000170385, ENSG00000143153, ENSG00000132681, ENSG00000129244

## Sheet: Table S6
Table S6: Differentially expressed PTGs(DEPTGs) of differentially expressed lincRNAs (DELs)
DELs	DELs_FPKM_WH	DELs_FPKM_YY	DELs_expression_status	DEPTGs	DEPTGs_name	DEPTGs_FPKM_WH	DEPTGs_FPKM_YY	DEPTGs_expression_status	r	p_value	FDR
TCONS_00000089	0.118024	0.797748	down	TCONS_00060114	ENSSSCG00000020669	1.05381	2.98425	down	0.951124	0.00352485	0.00366807
TCONS_00000089	0.118024	0.797748	down	TCONS_00005079	AK1	255.142	1271.78	down	0.95135	0.00349273	0.00366433
TCONS_00000089	0.118024	0.797748	down	TCONS_00025804	UBE2D4	52.168	135.706	down	0.951559	0.00346295	0.00365975
TCONS_00000089	0.118024	0.797748	down	TCONS_00026731	LDHA	1598.34	7399.69	down	0.951895	0.00341553	0.00365305
TCONS_00000089	0.118024	0.797748	down	TCONS_00006066	AQP3	1.21964	11.846	down	0.952213	0.00337077	0.00364533
TCONS_00000089	0.118024	0.797748	down	TCONS_00060122	PDXK	1.97564	5.23554	down	0.952758	0.00329494	0.00363339
TCONS_00000089	0.118024	0.797748	down	TCONS_00025612	LMOD2	253.969	69.9839	up	-0.955994	0.00286217	0.00356386
TCONS_00000089	0.118024	0.797748	down	TCONS_00014597	MB21D2	1.19531	0.333599	up	-0.956319	0.00282037	0.00355938
TCONS_00000089	0.118024	0.797748	down	TCONS_00006004	AGBL4	0.231341	1.48271	down	0.957345	0.00269038	0.00354341
TCONS_00000089	0.118024	0.797748	down	TCONS_00038718	L3MBTL2	0.644808	1.38409	down	0.958088	0.00259815	0.00352482
TCONS_00000089	0.118024	0.797748	down	TCONS_00000660	SETBP1	2.30477	1.12695	up	-0.95851	0.00254645	0.00351513
TCONS_00000089	0.118024	0.797748	down	TCONS_00025613	LMOD2	570.04	155.699	up	-0.959793	0.00239237	0.0034886
TCONS_00000089	0.118024	0.797748	down	TCONS_00043794	CDKN2C	3.36943	20.8913	down	0.960086	0.00235791	0.00348369
TCONS_00000089	0.118024	0.797748	down	TCONS_00024599	PPP1R3D	3.14554	9.25496	down	0.962873	0.00204203	0.00342149
TCONS_00000089	0.118024	0.797748	down	TCONS_00045412	CAPZB	30.9374	76.7899	down	0.963192	0.00200727	0.00341324
TCONS_00000089	0.118024	0.797748	down	TCONS_00061942	ENSSSCG00000018063	488.179	1425.28	down	0.963717	0.00195078	0.00340327
TCONS_00000089	0.118024	0.797748	down	TCONS_00023936	ENSSSCG00000007026	43.9463	24.7135	up	-0.96413	0.00190687	0.00339737
TCONS_00000089	0.118024	0.797748	down	TCONS_00017435	PEBP4	73.1832	240.825	down	0.96464	0.00185339	0.00338059
TCONS_00000089	0.118024	0.797748	down	TCONS_00017815	ALDH2	112.722	219.495	down	0.965149	0.00180075	0.00337074
TCONS_00000089	0.118024	0.797748	down	TCONS_00009893	SLC16A5	2.73801	12.6046	down	0.966273	0.00168711	0.00333167
TCONS_00000089	0.118024	0.797748	down	TCONS_00003776	ENSSSCG00000024263	518.88	932.695	down	0.966615	0.00165321	0.00332041
TCONS_00000089	0.118024	0.797748	down	TCONS_00062209	PRDX4	18.8664	58.3419	down	0.967418	0.00157504	0.00329267
TCONS_00000089	0.118024	0.797748	down	TCONS_00027578	LMNB2	1.72285	3.29607	down	0.968938	0.00143225	0.00323885
TCONS_00000089	0.118024	0.797748	down	TCONS_00000378	ENSSSCG00000025941	9.54156	19.8908	down	0.969365	0.0013934	0.00322548
TCONS_00000089	0.118024	0.797748	down	TCONS_00037916	MLLT11	25.8871	7.13448	up	-0.969733	0.00136031	0.00321132
TCONS_00000089	0.118024	0.797748	down	TCONS_00055828	GLUL	271.973	43.6598	up	-0.970463	0.00129573	0.00318258
TCONS_00000089	0.118024	0.797748	down	TCONS_00028968	TMEM109	23.4391	46.28	down	0.972362	0.00113527	0.00311863
TCONS_00000089	0.118024	0.797748	down	TCONS_00024164	FKBP1A	29.5475	65.7497	down	0.973093	0.00107623	0.00309189
TCONS_00000089	0.118024	0.797748	down	TCONS_00057646	ENSSSCG00000030436	0.46338	3.40926	down	0.973384	0.00105322	0.00308018
TCONS_00000089	0.118024	0.797748	down	TCONS_00047671	NRG4	4.04839	26.5881	down	0.973398	0.00105205	0.00307987
TCONS_00000089	0.118024	0.797748	down	TCONS_00047764	PKM	493.811	2631.88	down	0.974827	0.000942516	0.00301648
TCONS_00000089	0.118024	0.797748	down	TCONS_00005250	ENSSSCG00000005776	2.99498	23.177	down	0.975028	0.00092765	0.00301404
TCONS_00000089	0.118024	0.797748	down	TCONS_00002504	PLPP7	2.5142	11.251	down	0.975446	0.000896927	0.00300894
TCONS_00000089	0.118024	0.797748	down	TCONS_00045717	GJA9	0.0680121	1.7249	down	0.976529	0.000819841	0.00296627
TCONS_00000089	0.118024	0.797748	down	TCONS_00030277	POC5	0.648128	3.26037	down	0.976733	0.000805699	0.00295326
TCONS_00000089	0.118024	0.797748	down	TCONS_00041513	CDH15	0	0.794414	down	0.978826	0.000667789	0.00285684
TCONS_00000089	0.118024	0.797748	down	TCONS_00017437	PEBP4	41.7763	128.063	down	0.979031	0.00065496	0.00284652
TCONS_00000089	0.118024	0.797748	down	TCONS_00052490	CCDC109B	0.779652	2.56701	down	0.981246	0.000524264	0.00271932
TCONS_00000089	0.118024	0.797748	down	TCONS_00005248	ENSSSCG00000005776	1.33191	8.43641	down	0.98358	0.000402215	0.00256695
TCONS_00000089	0.118024	0.797748	down	TCONS_00043793	CDKN2C	1.69371	8.8599	down	0.984329	0.000366447	0.00251545
TCONS_00000089	0.118024	0.797748	down	TCONS_00003446	PSTPIP2	42.0878	107.34	down	0.985395	0.00031839	0.00242899
TCONS_00000134	1.28821	0.063132	up	TCONS_00022396	FAM134B	37.6988	14.4161	up	0.952049	0.00339381	0.00364989
TCONS_00000134	1.28821	0.063132	up	TCONS_00016700	ENSSSCG00000026923	13.4362	0	up	0.964634	0.00185399	0.00338059
TCONS_00000134	1.28821	0.063132	up	TCONS_00032427	PAIP2B	16.4229	4.81797	up	0.97103	0.0012467	0.00316608
TCONS_00000134	1.28821	0.063132	up	TCONS_00035346	FBXO32	85.7485	15.5997	up	0.972079	0.00115851	0.00313011
TCONS_00000742	16.247	30.8426	down	TCONS_00026619	ABTB2	1.12197	0.220796	up	-0.950201	0.00365809	0.00368412
TCONS_00000742	16.247	30.8426	down	TCONS_00047658	ABHD2	6.97204	2.96207	up	-0.950272	0.00364779	0.00368381
TCONS_00000742	16.247	30.8426	down	TCONS_00031550	PHKG1	26.6932	72.2815	down	0.951292	0.00350099	0.00366523
TCONS_00000742	16.247	30.8426	down	TCONS_00039263	TMEM19	10.3554	5.57917	up	-0.951301	0.00349962	0.00366523
TCONS_00000742	16.247	30.8426	down	TCONS_00051170	STBD1	62.3195	232.266	down	0.952418	0.00334226	0.0036406
TCONS_00000742	16.247	30.8426	down	TCONS_00014391	B3GALNT1	3.66259	1.15745	up	-0.952933	0.00327076	0.00362906
TCONS_00000742	16.247	30.8426	down	TCONS_00043794	CDKN2C	3.36943	20.8913	down	0.953087	0.00324966	0.00362628
TCONS_00000742	16.247	30.8426	down	TCONS_00057738	CHCHD5	8.93971	27.6335	down	0.953104	0.00324731	0.00362622
TCONS_00000742	16.247	30.8426	down	TCONS_00065062	BEX1	0.96929	3.76744	down	0.953327	0.00321667	0.00362227
TCONS_00000742	16.247	30.8426	down	TCONS_00023484	ENSSSCG00000025673	7.34167	16.9312	down	0.953393	0.00320768	0.00362061
TCONS_00000742	16.247	30.8426	down	TCONS_00013167	PFKL	8.30767	0.942442	up	-0.953843	0.00314649	0.00361137
TCONS_00000742	16.247	30.8426	down	TCONS_00023934	SLC20A2	8.02313	3.09913	up	-0.954521	0.00305551	0.00359409
TCONS_00000742	16.247	30.8426	down	TCONS_00015955	TBX3	3.59756	0.665723	up	-0.954707	0.00303074	0.00359041
TCONS_00000742	16.247	30.8426	down	TCONS_00064865	PGK1	496.621	1931.89	down	0.954998	0.0029922	0.00358463
TCONS_00000742	16.247	30.8426	down	TCONS_00049981	ST8SIA2	0.523329	2.61658	down	0.955015	0.00298996	0.00358389
TCONS_00000742	16.247	30.8426	down	TCONS_00060786	SMIM12	16.3004	36.2335	down	0.955016	0.00298976	0.00358389
TCONS_00000742	16.247	30.8426	down	TCONS_00062016	CLCN4	8.48803	3.57187	up	-0.955091	0.00297993	0.00358294
TCONS_00000742	16.247	30.8426	down	TCONS_00024962	CCDC136	0.274637	1.0156	down	0.95574	0.00289502	0.00356882
TCONS_00000742	16.247	30.8426	down	TCONS_00047671	NRG4	4.04839	26.5881	down	0.957542	0.00266577	0.00353915
TCONS_00000742	16.247	30.8426	down	TCONS_00001829	ENSSSCG00000005243	7.15953	1.87518	up	-0.957989	0.00261027	0.00352767
TCONS_00000742	16.247	30.8426	down	TCONS_00000438	SMIM8	14.493	36.7027	down	0.958031	0.00260516	0.00352632
TCONS_00000742	16.247	30.8426	down	TCONS_00058552	LRRC30	1.07554	8.64084	down	0.95886	0.00250397	0.00350539
TCONS_00000742	16.247	30.8426	down	TCONS_00018282	ANK3	16.9473	3.44191	up	-0.958946	0.00249351	0.00350406
TCONS_00000742	16.247	30.8426	down	TCONS_00040863	TPI1	969.636	3092.4	down	0.959217	0.00246095	0.00349713
TCONS_00000742	16.247	30.8426	down	TCONS_00000887	ARPP19	39.5005	15.909	up	-0.959241	0.0024581	0.00349681
TCONS_00000742	16.247	30.8426	down	TCONS_00060122	PDXK	1.97564	5.23554	down	0.961206	0.00222823	0.00346322
TCONS_00000742	16.247	30.8426	down	TCONS_00007774	SHISA2	1.96428	85.273	down	0.963848	0.00193677	0.00340084
TCONS_00000742	16.247	30.8426	down	TCONS_00020235	ATIC	2.49418	8.75514	down	0.964833	0.00183337	0.00337744
TCONS_00000742	16.247	30.8426	down	TCONS_00024759	SMARCD3	16.7408	44.6098	down	0.96483	0.0018336	0.00337744
TCONS_00000742	16.247	30.8426	down	TCONS_00008892	DNAJC7	56.8496	112.264	down	0.965911	0.00172328	0.00334542
TCONS_00000742	16.247	30.8426	down	TCONS_00018268	FAM13C	7.4978	2.8256	up	-0.966159	0.00169844	0.00333708
TCONS_00000742	16.247	30.8426	down	TCONS_00036566	ENSSSCG00000006839	16.4731	37.5475	down	0.966553	0.00165931	0.00332198
TCONS_00000742	16.247	30.8426	down	TCONS_00064653	PFKFB1	20.6944	58.0425	down	0.966581	0.00165661	0.00332148
TCONS_00000742	16.247	30.8426	down	TCONS_00058935	7SK	13.9391	5.75693	up	-0.96677	0.00163796	0.00331599
TCONS_00000742	16.247	30.8426	down	TCONS_00029836	RPS28	911.564	1692.64	down	0.966789	0.0016361	0.00331539
TCONS_00000742	16.247	30.8426	down	TCONS_00026760	KCNJ11	18.8797	39.3824	down	0.967021	0.00161349	0.00330728
TCONS_00000742	16.247	30.8426	down	TCONS_00006617	IGFN1	49.7032	999.863	down	0.967071	0.00160862	0.00330604
TCONS_00000742	16.247	30.8426	down	TCONS_00060083	HRAS	7.49397	22.5993	down	0.967573	0.00156021	0.00328751
TCONS_00000742	16.247	30.8426	down	TCONS_00058665	ENSSSCG00000027020	0.564268	1.79578	down	0.967822	0.00153647	0.00327766
TCONS_00000742	16.247	30.8426	down	TCONS_00012351	PTX3	0.737444	2.17031	down	0.968322	0.00148937	0.00326242
TCONS_00000742	16.247	30.8426	down	TCONS_00043749	C1orf123	39.5106	89.3791	down	0.968595	0.00146396	0.00325143
TCONS_00000742	16.247	30.8426	down	TCONS_00011136	MYH10	2.22581	0.908796	up	-0.968984	0.00142811	0.00323811
TCONS_00000742	16.247	30.8426	down	TCONS_00060275	ENSSSCG00000022607	84.464	43.4596	up	-0.972671	0.00111007	0.00311106
TCONS_00000742	16.247	30.8426	down	TCONS_00011134	ENSSSCG00000017987	5.74064	1.36127	up	-0.974405	0.000974271	0.00303616
TCONS_00000742	16.247	30.8426	down	TCONS_00041139	DRAM1	0.532428	2.00755	down	0.974653	0.000955581	0.00302458
TCONS_00000742	16.247	30.8426	down	TCONS_00040070	ATF4	1278.36	3309.91	down	0.974941	0.000934034	0.00301404
TCONS_00000742	16.247	30.8426	down	TCONS_00005079	AK1	255.142	1271.78	down	0.975453	0.00089643	0.00300894
TCONS_00000742	16.247	30.8426	down	TCONS_00040247	GPD1	230.45	941.028	down	0.976898	0.000794376	0.00294391
TCONS_00000742	16.247	30.8426	down	TCONS_00055750	PIGC	44.9801	84.8936	down	0.976998	0.000787586	0.00293756
TCONS_00000742	16.247	30.8426	down	TCONS_00021195	MSTN	2.50422	8.76736	down	0.979992	0.000596475	0.00279998
TCONS_00000742	16.247	30.8426	down	TCONS_00060616	ENSSSCG00000021703	70.398	246.601	down	0.98007	0.000591848	0.00279592
TCONS_00000742	16.247	30.8426	down	TCONS_00003775	HYPK	72.1636	151.27	down	0.98042	0.000571334	0.00277483
TCONS_00000742	16.247	30.8426	down	TCONS_00006619	ENSSSCG00000021650	25.2978	481.971	down	0.981102	0.000532332	0.00272838
TCONS_00000742	16.247	30.8426	down	TCONS_00039644	TUBAL3	41.8437	104.377	down	0.981642	0.000502444	0.00268839
TCONS_00000742	16.247	30.8426	down	TCONS_00027134	TECR	82.2836	217.786	down	0.982194	0.000472758	0.00265161
TCONS_00000742	16.247	30.8426	down	TCONS_00006620	ENSSSCG00000021650	34.0789	519.768	down	0.982393	0.00046226	0.00263866
TCONS_00000742	16.247	30.8426	down	TCONS_00003678	LYSMD2	1.83645	16.0753	down	0.982912	0.000435512	0.00261575
TCONS_00000742	16.247	30.8426	down	TCONS_00009432	ENSSSCG00000017796	34.4322	73.314	down	0.984188	0.000373062	0.00252447
TCONS_00000742	16.247	30.8426	down	TCONS_00013086	SMIM11A	28.355	122.873	down	0.985155	0.000328909	0.00244463
TCONS_00000742	16.247	30.8426	down	TCONS_00025195	ENSSSCG00000016735	9.20109	27.7215	down	0.988458	0.000199043	0.00220846
TCONS_00000742	16.247	30.8426	down	TCONS_00027719	RNF130	85.0951	216.32	down	0.988733	0.000189707	0.0021765
TCONS_00000742	16.247	30.8426	down	TCONS_00056389	ENSSSCG00000029354	9.89742	21.3023	down	0.989131	0.000176571	0.00214774
TCONS_00000742	16.247	30.8426	down	TCONS_00007454	MED4	31.511	56.5873	down	0.989593	0.000161904	0.00209615
TCONS_00000742	16.247	30.8426	down	TCONS_00025181	PGAM2	839.422	3235.41	down	0.989814	0.000155094	0.00206839
TCONS_00000742	16.247	30.8426	down	TCONS_00060362	ENSSSCG00000023496	169.152	589.63	down	0.989952	0.000150922	0.00205266
TCONS_00000742	16.247	30.8426	down	TCONS_00008411	SLC16A3	4.30595	17.8413	down	0.990432	0.000136884	0.0020382
TCONS_00000742	16.247	30.8426	down	TCONS_00003680	LYSMD2	1.40209	8.35594	down	0.991932	9.74e-05	0.001884
TCONS_00000742	16.247	30.8426	down	TCONS_00064826	PBDC1	6.47968	12.0886	down	0.997859	6.87e-06	0.000528796
TCONS_00005771	1.61626	0.466647	up	TCONS_00001197	ACTC1	11.1169	5.14868	up	0.95077	0.00357567	0.00367507
TCONS_00005771	1.61626	0.466647	up	TCONS_00045384	PADI2	28.6823	0.105602	up	0.953683	0.00316826	0.00361588
TCONS_00005771	1.61626	0.466647	up	TCONS_00035769	ENSSSCG00000030473	30.5256	6.23741	up	0.961036	0.00224776	0.00346579
TCONS_00005771	1.61626	0.466647	up	TCONS_00053615	BARX2	1.16326	0.127645	up	0.973874	0.00101496	0.00305906
TCONS_00005771	1.61626	0.466647	up	TCONS_00059440	SMPX	705.545	330.082	up	0.975212	0.00091408	0.00301404
TCONS_00005771	1.61626	0.466647	up	TCONS_00020179	ADAM23	0.970796	0.193112	up	0.977917	0.000726092	0.00289788
TCONS_00005771	1.61626	0.466647	up	TCONS_00004580	MAMDC2	3.0442	0.707494	up	0.979619	0.000618833	0.00281275
TCONS_00006963	2.42237	0.491371	up	TCONS_00014317	PFN2	153.238	43.0444	up	0.950318	0.00364116	0.00368302
TCONS_00006963	2.42237	0.491371	up	TCONS_00048205	ENSSSCG00000002351	52.6037	4.6191	up	0.950794	0.00357229	0.00367456
TCONS_00006963	2.42237	0.491371	up	TCONS_00017815	ALDH2	112.722	219.495	down	-0.951672	0.00344695	0.00365807
TCONS_00006963	2.42237	0.491371	up	TCONS_00018149	ACTN2	1740.66	438.297	up	0.952726	0.00329948	0.0036341
TCONS_00006963	2.42237	0.491371	up	TCONS_00042971	SLC25A34	30.7792	9.39264	up	0.95281	0.00328773	0.00363218
TCONS_00006963	2.42237	0.491371	up	TCONS_00011134	ENSSSCG00000017987	5.74064	1.36127	up	0.954068	0.00311619	0.00360567
TCONS_00006963	2.42237	0.491371	up	TCONS_00041703	RSPRY1	3.64641	6.69655	down	-0.954663	0.00303657	0.00359106
TCONS_00006963	2.42237	0.491371	up	TCONS_00000700	ME2	13.5749	4.15516	up	0.955169	0.0029697	0.00358094
TCONS_00006963	2.42237	0.491371	up	TCONS_00049405	RCAN2	79.5155	10.9805	up	0.95586	0.00287953	0.00356618
TCONS_00006963	2.42237	0.491371	up	TCONS_00021395	ACADL	81.2903	30.6048	up	0.956436	0.00280545	0.00355622
TCONS_00006963	2.42237	0.491371	up	TCONS_00006985	PROSER2	2.55931	1.186	up	0.959267	0.002455	0.00349668
TCONS_00006963	2.42237	0.491371	up	TCONS_00019834	PDK1	7.81607	2.45712	up	0.960222	0.00234196	0.00348061
TCONS_00006963	2.42237	0.491371	up	TCONS_00004580	MAMDC2	3.0442	0.707494	up	0.960392	0.00232207	0.00347677
TCONS_00006963	2.42237	0.491371	up	TCONS_00018833	PITX3	6.25137	1.4001	up	0.961934	0.002146	0.00344604
TCONS_00006963	2.42237	0.491371	up	TCONS_00015955	TBX3	3.59756	0.665723	up	0.962618	0.00207	0.00342756
TCONS_00006963	2.42237	0.491371	up	TCONS_00032810	HADHA	221.449	78.7154	up	0.963497	0.00197439	0.00340797
TCONS_00006963	2.42237	0.491371	up	TCONS_00059440	SMPX	705.545	330.082	up	0.964012	0.00191939	0.00339821
TCONS_00006963	2.42237	0.491371	up	TCONS_00014391	B3GALNT1	3.66259	1.15745	up	0.964494	0.00186866	0.00338494
TCONS_00006963	2.42237	0.491371	up	TCONS_00038718	L3MBTL2	0.644808	1.38409	down	-0.966969	0.00161856	0.00331043
TCONS_00006963	2.42237	0.491371	up	TCONS_00011136	MYH10	2.22581	0.908796	up	0.966993	0.00161622	0.00330882
TCONS_00006963	2.42237	0.491371	up	TCONS_00013167	PFKL	8.30767	0.942442	up	0.970334	0.00130709	0.00318807
TCONS_00006963	2.42237	0.491371	up	TCONS_00010222	MLX	14.5393	27.4394	down	-0.973954	0.00100874	0.00305524
TCONS_00006963	2.42237	0.491371	up	TCONS_00014316	PFN2	10.3947	3.28477	up	0.976305	0.000835531	0.00297494
TCONS_00006963	2.42237	0.491371	up	TCONS_00001715	ENSSSCG00000005171	17.0551	5.07829	up	0.977403	0.000760194	0.0029231
TCONS_00006963	2.42237	0.491371	up	TCONS_00012011	LMCD1	234.893	61.3474	up	0.977494	0.000754047	0.0029198
TCONS_00006963	2.42237	0.491371	up	TCONS_00017336	INPP5A	7.97831	2.02816	up	0.977692	0.000740892	0.00290862
TCONS_00006963	2.42237	0.491371	up	TCONS_00005852	ZBTB18	30.2575	62.5352	down	-0.978535	0.000686168	0.00287264
TCONS_00006963	2.42237	0.491371	up	TCONS_00013168	PFKL	3.4361	1.08927	up	0.983405	0.000410784	0.0025779
TCONS_00006963	2.42237	0.491371	up	TCONS_00002163	HSDL2	69.0371	26.4747	up	0.987386	0.000237684	0.00227712
TCONS_00006963	2.42237	0.491371	up	TCONS_00000361	ROS1	1.83544	0.241133	up	0.987475	0.000234333	0.0022689
TCONS_00006963	2.42237	0.491371	up	TCONS_00016934	ANKRD2	379.857	54.6447	up	0.988834	0.000186308	0.00216469
TCONS_00007946	1.97915	7.38398	down	TCONS_00021195	MSTN	2.50422	8.76736	down	0.950207	0.00365722	0.00368402
TCONS_00007946	1.97915	7.38398	down	TCONS_00039451	CLEC12A	0.284948	1.00165	down	0.950897	0.0035574	0.00367247
TCONS_00007946	1.97915	7.38398	down	TCONS_00048255	VASH1	0.412373	1.00401	down	0.951869	0.00341912	0.00365326
TCONS_00007946	1.97915	7.38398	down	TCONS_00025982	DEAF1	11.2326	22.5417	down	0.954103	0.00311146	0.00360481
TCONS_00007946	1.97915	7.38398	down	TCONS_00024962	CCDC136	0.274637	1.0156	down	0.955622	0.00291037	0.00357153
TCONS_00007946	1.97915	7.38398	down	TCONS_00060729	CSTB	16.2614	35.2793	down	0.956046	0.00285547	0.00356365
TCONS_00007946	1.97915	7.38398	down	TCONS_00025137	HOXA7	1.04843	4.17008	down	0.956185	0.0028376	0.00355986
TCONS_00007946	1.97915	7.38398	down	TCONS_00039644	TUBAL3	41.8437	104.377	down	0.957154	0.00271429	0.00354662
TCONS_00007946	1.97915	7.38398	down	TCONS_00019757	CERS6	0.884545	0.238988	up	-0.958389	0.00256121	0.00351813
TCONS_00007946	1.97915	7.38398	down	TCONS_00034138	TMSB10	66.6878	149.351	down	0.959791	0.00239267	0.0034886
TCONS_00007946	1.97915	7.38398	down	TCONS_00007767	ENSSSCG00000009285	1.63252	4.39265	down	0.961624	0.00218083	0.00345262
TCONS_00007946	1.97915	7.38398	down	TCONS_00003775	HYPK	72.1636	151.27	down	0.964197	0.00189979	0.00339607
TCONS_00007946	1.97915	7.38398	down	TCONS_00064826	PBDC1	6.47968	12.0886	down	0.964511	0.00186687	0.00338459
TCONS_00007946	1.97915	7.38398	down	TCONS_00007458	ESD	42.4757	92.1499	down	0.964859	0.00183066	0.00337739
TCONS_00007946	1.97915	7.38398	down	TCONS_00007454	MED4	31.511	56.5873	down	0.965538	0.001761	0.00335849
TCONS_00007946	1.97915	7.38398	down	TCONS_00041139	DRAM1	0.532428	2.00755	down	0.966484	0.00166614	0.0033247
TCONS_00007946	1.97915	7.38398	down	TCONS_00059743	ENSSSCG00000025188	1.44845	0.530608	up	-0.96741	0.00157589	0.00329334
TCONS_00007946	1.97915	7.38398	down	TCONS_00060275	ENSSSCG00000022607	84.464	43.4596	up	-0.96832	0.00148956	0.00326242
TCONS_00007946	1.97915	7.38398	down	TCONS_00032402	TPRKB	10.5936	29.7429	down	0.969121	0.00141556	0.00323242
TCONS_00007946	1.97915	7.38398	down	TCONS_00008411	SLC16A3	4.30595	17.8413	down	0.969259	0.00140295	0.00322783
TCONS_00007946	1.97915	7.38398	down	TCONS_00023484	ENSSSCG00000025673	7.34167	16.9312	down	0.969264	0.00140253	0.00322783
TCONS_00007946	1.97915	7.38398	down	TCONS_00060362	ENSSSCG00000023496	169.152	589.63	down	0.972147	0.00115287	0.00312649
TCONS_00007946	1.97915	7.38398	down	TCONS_00034424	ENSSSCG00000026974	30.0533	13.7151	up	-0.974171	0.000992106	0.00304627
TCONS_00007946	1.97915	7.38398	down	TCONS_00065062	BEX1	0.96929	3.76744	down	0.976095	0.000850362	0.00298199
TCONS_00007946	1.97915	7.38398	down	TCONS_00040247	GPD1	230.45	941.028	down	0.97795	0.000723925	0.00289423
TCONS_00007946	1.97915	7.38398	down	TCONS_00043749	C1orf123	39.5106	89.3791	down	0.980635	0.000558889	0.0027621
TCONS_00007946	1.97915	7.38398	down	TCONS_00056389	ENSSSCG00000029354	9.89742	21.3023	down	0.981598	0.000504826	0.00269255
TCONS_00007946	1.97915	7.38398	down	TCONS_00020235	ATIC	2.49418	8.75514	down	0.982187	0.000473117	0.00265236
TCONS_00007946	1.97915	7.38398	down	TCONS_00006619	ENSSSCG00000021650	25.2978	481.971	down	0.982961	0.000433013	0.00261153
TCONS_00007946	1.97915	7.38398	down	TCONS_00008833	RND2	0.142984	0.555141	down	0.98302	0.000430008	0.0026081
TCONS_00007946	1.97915	7.38398	down	TCONS_00013086	SMIM11A	28.355	122.873	down	0.983201	0.000420945	0.00259558
TCONS_00007946	1.97915	7.38398	down	TCONS_00058665	ENSSSCG00000027020	0.564268	1.79578	down	0.983483	0.000406941	0.00257157
TCONS_00007946	1.97915	7.38398	down	TCONS_00034286	NFU1	8.93285	17.6375	down	0.984458	0.000360451	0.00250322
TCONS_00007946	1.97915	7.38398	down	TCONS_00060616	ENSSSCG00000021703	70.398	246.601	down	0.984571	0.000355262	0.00249243
TCONS_00007946	1.97915	7.38398	down	TCONS_00029836	RPS28	911.564	1692.64	down	0.984764	0.000346441	0.00247538
TCONS_00007946	1.97915	7.38398	down	TCONS_00024759	SMARCD3	16.7408	44.6098	down	0.985938	0.000295225	0.00238798
TCONS_00007946	1.97915	7.38398	down	TCONS_00058552	LRRC30	1.07554	8.64084	down	0.986729	0.000263025	0.00233122
TCONS_00007946	1.97915	7.38398	down	TCONS_00003678	LYSMD2	1.83645	16.0753	down	0.986757	0.000261902	0.00233
TCONS_00007946	1.97915	7.38398	down	TCONS_00006617	IGFN1	49.7032	999.863	down	0.987586	0.000230206	0.00225979
TCONS_00007946	1.97915	7.38398	down	TCONS_00006620	ENSSSCG00000021650	34.0789	519.768	down	0.987762	0.000223743	0.00225794
TCONS_00007946	1.97915	7.38398	down	TCONS_00002014	ENSSSCG00000005381	11.7008	24.9646	down	0.987987	0.000215601	0.00223715
TCONS_00007946	1.97915	7.38398	down	TCONS_00027134	TECR	82.2836	217.786	down	0.988746	0.000189273	0.00217581
TCONS_00007946	1.97915	7.38398	down	TCONS_00007774	SHISA2	1.96428	85.273	down	0.991206	0.000115671	0.00197474
TCONS_00007946	1.97915	7.38398	down	TCONS_00060786	SMIM12	16.3004	36.2335	down	0.991546	0.000106896	0.00193017
TCONS_00007946	1.97915	7.38398	down	TCONS_00057738	CHCHD5	8.93971	27.6335	down	0.993297	6.73e-05	0.0017048
TCONS_00007946	1.97915	7.38398	down	TCONS_00060083	HRAS	7.49397	22.5993	down	0.99424	4.97e-05	0.00152243
TCONS_00013076	0.622037	1.52898	down	TCONS_00029383	ENSSSCG00000013400	5.46772	58.1583	down	0.950654	0.00359243	0.00367642
TCONS_00013076	0.622037	1.52898	down	TCONS_00002744	ENSSSCG00000029556	0.55488	0	up	-0.958793	0.00251208	0.003507
TCONS_00013076	0.622037	1.52898	down	TCONS_00008634	PRKCA	5.50631	13.2708	down	0.978019	0.00071943	0.00289151
TCONS_00021480	1.73595	11.0881	down	TCONS_00003446	PSTPIP2	42.0878	107.34	down	0.958664	0.00252766	0.00350938
TCONS_00021480	1.73595	11.0881	down	TCONS_00055732	MYBPH	91.2219	378.863	down	0.959601	0.00241514	0.00349325
TCONS_00021480	1.73595	11.0881	down	TCONS_00043998	ssc-mir-4332	114.147	837.116	down	0.960503	0.0023092	0.003475
TCONS_00021480	1.73595	11.0881	down	TCONS_00027578	LMNB2	1.72285	3.29607	down	0.964352	0.00188351	0.00339048
TCONS_00021480	1.73595	11.0881	down	TCONS_00017435	PEBP4	73.1832	240.825	down	0.965073	0.0018085	0.00337175
TCONS_00021480	1.73595	11.0881	down	TCONS_00041513	CDH15	0	0.794414	down	0.967193	0.00159677	0.0033005
TCONS_00021480	1.73595	11.0881	down	TCONS_00024599	PPP1R3D	3.14554	9.25496	down	0.967323	0.00158427	0.00329564
TCONS_00021480	1.73595	11.0881	down	TCONS_00061942	ENSSSCG00000018063	488.179	1425.28	down	0.973327	0.00105766	0.00308063
TCONS_00021480	1.73595	11.0881	down	TCONS_00045717	GJA9	0.0680121	1.7249	down	0.974618	0.00095822	0.00302458
TCONS_00021480	1.73595	11.0881	down	TCONS_00055731	MYBPH	30.5612	131.136	down	0.989089	0.000177922	0.00214955
TCONS_00021480	1.73595	11.0881	down	TCONS_00036340	TXNIP	526.444	221.143	up	-0.990227	0.000142801	0.00205266
TCONS_00021480	1.73595	11.0881	down	TCONS_00061940	ENSSSCG00000018061	465.599	1054.13	down	0.990367	0.000138734	0.00204571
TCONS_00021915	1.90451	0.388453	up	TCONS_00031922	TIGD7	0.793723	2.51378	down	-0.950255	0.00365027	0.00368399
TCONS_00021915	1.90451	0.388453	up	TCONS_00035378	SNTB1	4.49964	48.6363	down	-0.950782	0.00357398	0.00367496
TCONS_00021915	1.90451	0.388453	up	TCONS_00051029	ETFDH	161.699	54.2712	up	0.951008	0.00354154	0.00367092
TCONS_00021915	1.90451	0.388453	up	TCONS_00059034	GPX7	1.07273	2.50104	down	-0.951546	0.00346483	0.00366023
TCONS_00021915	1.90451	0.388453	up	TCONS_00034699	GAREM2	0.430482	1.32809	down	-0.951719	0.00344036	0.00365679
TCONS_00021915	1.90451	0.388453	up	TCONS_00042090	FAM98C	3.21315	7.77941	down	-0.952727	0.00329925	0.0036341
TCONS_00021915	1.90451	0.388453	up	TCONS_00055114	SLC37A4	10.4753	41.4438	down	-0.952929	0.00327135	0.00362921
TCONS_00021915	1.90451	0.388453	up	TCONS_00046127	ENSSSCG00000003812	556.451	2539.92	down	-0.952934	0.00327065	0.00362902
TCONS_00021915	1.90451	0.388453	up	TCONS_00010503	ENSSSCG00000017624	6.40509	2.94812	up	0.953868	0.00314316	0.00361075
TCONS_00021915	1.90451	0.388453	up	TCONS_00056373	HSPB7	320.217	65.9266	up	0.953939	0.00313355	0.00360925
TCONS_00021915	1.90451	0.388453	up	TCONS_00003391	ENSSSCG00000022379	16.6681	38.9428	down	-0.954439	0.00306644	0.00359591
TCONS_00021915	1.90451	0.388453	up	TCONS_00028966	SLC15A3	0.252955	0.725449	down	-0.954574	0.00304848	0.00359259
TCONS_00021915	1.90451	0.388453	up	TCONS_00035874	CFAP126	1.55119	0.541602	up	0.954658	0.00303717	0.00359106
TCONS_00021915	1.90451	0.388453	up	TCONS_00052569	RAP1GDS1	1.46979	4.9495	down	-0.954871	0.00300897	0.00358712
TCONS_00021915	1.90451	0.388453	up	TCONS_00036566	ENSSSCG00000006839	16.4731	37.5475	down	-0.955226	0.00296219	0.0035798
TCONS_00021915	1.90451	0.388453	up	TCONS_00060122	PDXK	1.97564	5.23554	down	-0.957173	0.00271197	0.00354662
TCONS_00021915	1.90451	0.388453	up	TCONS_00014232	ENSSSCG00000026073	1.8673	4.20145	down	-0.957375	0.00268661	0.00354279
TCONS_00021915	1.90451	0.388453	up	TCONS_00060795	ITGB1BP2	30.2831	73.0991	down	-0.958059	0.00260165	0.00352588
TCONS_00021915	1.90451	0.388453	up	TCONS_00060440	ADSSL1	201.671	405.657	down	-0.958646	0.00252987	0.00350998
TCONS_00021915	1.90451	0.388453	up	TCONS_00002504	PLPP7	2.5142	11.251	down	-0.959129	0.00247152	0.00349975
TCONS_00021915	1.90451	0.388453	up	TCONS_00063999	AP1S2	20.406	3.24979	up	0.95927	0.00245459	0.00349668
TCONS_00021915	1.90451	0.388453	up	TCONS_00019850	ENSSSCG00000015960	143.108	39.0742	up	0.95972	0.00240103	0.00349094
TCONS_00021915	1.90451	0.388453	up	TCONS_00028551	PNPLA2	72.2729	35.9034	up	0.959818	0.00238947	0.00348841
TCONS_00021915	1.90451	0.388453	up	TCONS_00061889	ENSSSCG00000024011	3.26928	0	up	0.960134	0.00235228	0.00348314
TCONS_00021915	1.90451	0.388453	up	TCONS_00046040	ACADM	452.178	139.396	up	0.960227	0.00234135	0.00348051
TCONS_00021915	1.90451	0.388453	up	TCONS_00018312	ENSSSCG00000028327	7.91025	25.1169	down	-0.961084	0.00224224	0.00346579
TCONS_00021915	1.90451	0.388453	up	TCONS_00061530	ENSSSCG00000022748	58.5499	337.613	down	-0.961235	0.00222501	0.00346239
TCONS_00021915	1.90451	0.388453	up	TCONS_00018402	ENSSSCG00000010283	0.618373	2.36244	down	-0.961473	0.00219792	0.00345783
TCONS_00021915	1.90451	0.388453	up	TCONS_00006004	AGBL4	0.231341	1.48271	down	-0.962295	0.00210567	0.0034356
TCONS_00021915	1.90451	0.388453	up	TCONS_00001829	ENSSSCG00000005243	7.15953	1.87518	up	0.963688	0.00195395	0.00340427
TCONS_00021915	1.90451	0.388453	up	TCONS_00047899	BCL2L2	7.93089	3.30729	up	0.96436	0.00188271	0.00339023
TCONS_00021915	1.90451	0.388453	up	TCONS_00054781	ME3	8.72301	2.44203	up	0.964364	0.00188223	0.00339023
TCONS_00021915	1.90451	0.388453	up	TCONS_00000887	ARPP19	39.5005	15.909	up	0.965143	0.00180132	0.00337074
TCONS_00021915	1.90451	0.388453	up	TCONS_00045710	ENSSSCG00000003644	33.5976	18.5057	up	0.965854	0.00172904	0.00334689
TCONS_00021915	1.90451	0.388453	up	TCONS_00014597	MB21D2	1.19531	0.333599	up	0.966051	0.00170919	0.00334154
TCONS_00021915	1.90451	0.388453	up	TCONS_00047764	PKM	493.811	2631.88	down	-0.967003	0.00161521	0.00330827
TCONS_00021915	1.90451	0.388453	up	TCONS_00017437	PEBP4	41.7763	128.063	down	-0.967069	0.00160879	0.00330609
TCONS_00021915	1.90451	0.388453	up	TCONS_00028063	NREP	19.5655	130.347	down	-0.967192	0.00159687	0.0033005
TCONS_00021915	1.90451	0.388453	up	TCONS_00017048	NEURL1	30.7066	81.5866	down	-0.967356	0.00158104	0.00329504
TCONS_00021915	1.90451	0.388453	up	TCONS_00018106	C22orf39	3.74593	1.42777	up	0.967514	0.00156589	0.00329048
TCONS_00021915	1.90451	0.388453	up	TCONS_00040863	TPI1	969.636	3092.4	down	-0.967553	0.00156212	0.00328822
TCONS_00021915	1.90451	0.388453	up	TCONS_00060114	ENSSSCG00000020669	1.05381	2.98425	down	-0.968402	0.00148187	0.00325944
TCONS_00021915	1.90451	0.388453	up	TCONS_00022330	2017-03-06	20.2797	7.85675	up	0.968583	0.00146502	0.00325188
TCONS_00021915	1.90451	0.388453	up	TCONS_00008628	WIPI1	22.4616	10.8575	up	0.969097	0.00141774	0.00323411
TCONS_00021915	1.90451	0.388453	up	TCONS_00028670	CARNS1	14.8344	95.0034	down	-0.96932	0.00139749	0.00322597
TCONS_00021915	1.90451	0.388453	up	TCONS_00062209	PRDX4	18.8664	58.3419	down	-0.969579	0.00137408	0.00321732
TCONS_00021915	1.90451	0.388453	up	TCONS_00044356	GPI	92.5725	348.91	down	-0.969997	0.00133677	0.00319983
TCONS_00021915	1.90451	0.388453	up	TCONS_00035646	UBE2W	7.01855	3.73902	up	0.970275	0.0013122	0.00319053
TCONS_00021915	1.90451	0.388453	up	TCONS_00037916	MLLT11	25.8871	7.13448	up	0.970536	0.00128937	0.00317904
TCONS_00021915	1.90451	0.388453	up	TCONS_00061694	ENSSSCG00000024279	0	1.0964	down	-0.970946	0.00125398	0.00316765
TCONS_00021915	1.90451	0.388453	up	TCONS_00025275	ENSSSCG00000016772	13.9824	6.07268	up	0.971214	0.00123099	0.00316017
TCONS_00021915	1.90451	0.388453	up	TCONS_00045412	CAPZB	30.9374	76.7899	down	-0.973869	0.00101529	0.00305931
TCONS_00021915	1.90451	0.388453	up	TCONS_00018619	ENSSSCG00000010441	0.251481	1.36028	down	-0.975433	0.000897866	0.00300958
TCONS_00021915	1.90451	0.388453	up	TCONS_00002505	PLPP7	17.0674	60.6543	down	-0.975909	0.000863566	0.00298966
TCONS_00021915	1.90451	0.388453	up	TCONS_00007392	NEK3	3.85585	0.144473	up	0.976115	0.000848957	0.00298112
TCONS_00021915	1.90451	0.388453	up	TCONS_00058253	KCNS3	0.959317	10.3577	down	-0.977075	0.000782289	0.00293494
TCONS_00021915	1.90451	0.388453	up	TCONS_00000378	ENSSSCG00000025941	9.54156	19.8908	down	-0.977232	0.000771648	0.00293252
TCONS_00021915	1.90451	0.388453	up	TCONS_00007775	SHISA2	1.77013	52.5011	down	-0.977255	0.000770095	0.00293119
TCONS_00021915	1.90451	0.388453	up	TCONS_00026731	LDHA	1598.34	7399.69	down	-0.978401	0.00069472	0.00287881
TCONS_00021915	1.90451	0.388453	up	TCONS_00044357	GPI	191.301	835.172	down	-0.978616	0.000681022	0.0028706
TCONS_00021915	1.90451	0.388453	up	TCONS_00025672	LSMEM1	4.63988	15.201	down	-0.980767	0.000551316	0.00275443
TCONS_00021915	1.90451	0.388453	up	TCONS_00023936	ENSSSCG00000007026	43.9463	24.7135	up	0.981318	0.000520271	0.00271388
TCONS_00021915	1.90451	0.388453	up	TCONS_00022910	UBE2QL1	7.74212	2.3395	up	0.981873	0.000489897	0.00267221
TCONS_00021915	1.90451	0.388453	up	TCONS_00025697	ENSSSCG00000022824	9.9626	4.57609	up	0.98205	0.000480419	0.00265996
TCONS_00021915	1.90451	0.388453	up	TCONS_00053018	FOLR2	4.87288	13.6139	down	-0.982062	0.000479791	0.0026598
TCONS_00021915	1.90451	0.388453	up	TCONS_00025804	UBE2D4	52.168	135.706	down	-0.982347	0.000464698	0.00263866
TCONS_00021915	1.90451	0.388453	up	TCONS_00057627	ENSSSCG00000025798	1.96209	0.595733	up	0.984777	0.000345863	0.00247394
TCONS_00021915	1.90451	0.388453	up	TCONS_00037443	ATP1B1	184.607	102.64	up	0.987789	0.000222759	0.00225483
TCONS_00021915	1.90451	0.388453	up	TCONS_00000297	ENSSSCG00000004205	1.93671	8.84399	down	-0.988297	0.000204629	0.00221309
TCONS_00021915	1.90451	0.388453	up	TCONS_00006848	ENSSSCG00000011035	14.6617	40.179	down	-0.988297	0.000204652	0.00221309
TCONS_00021915	1.90451	0.388453	up	TCONS_00061511	ENSSSCG00000022908	9.56348	29.1564	down	-0.989783	0.000156033	0.00207091
TCONS_00034774	2.71109	0.356262	up	TCONS_00059268	IFNAR2	3.29221	0.983855	up	0.954929	0.00300134	0.003586
TCONS_00034774	2.71109	0.356262	up	TCONS_00012634	HES1	13.3731	3.86258	up	0.955479	0.0029291	0.00357231
TCONS_00034774	2.71109	0.356262	up	TCONS_00005063	ANGPTL2	12.798	3.45187	up	0.961692	0.00217313	0.00345137
TCONS_00034774	2.71109	0.356262	up	TCONS_00038053	ENSSSCG00000006723	29.5809	9.83079	up	0.96747	0.00157013	0.00329171
TCONS_00044733	1.175	0.0998624	up	TCONS_00047561	ZFAND6	102.239	198.665	down	-0.950456	0.00362115	0.00368018
TCONS_00044733	1.175	0.0998624	up	TCONS_00030534	ZNF608	1.05893	0.232129	up	0.951531	0.00346695	0.00366068
TCONS_00044733	1.175	0.0998624	up	TCONS_00057965	ENSSSCG00000027994	6.12754	1.71365	up	0.951831	0.00342453	0.00365383
TCONS_00044733	1.175	0.0998624	up	TCONS_00054918	SLN	3044.17	7505.55	down	-0.952106	0.00338576	0.00364806
TCONS_00044733	1.175	0.0998624	up	TCONS_00019868	HOXD9	2.4057	8.08235	down	-0.953653	0.00317228	0.00361651
TCONS_00044733	1.175	0.0998624	up	TCONS_00054781	ME3	8.72301	2.44203	up	0.954187	0.00310022	0.00360205
TCONS_00044733	1.175	0.0998624	up	TCONS_00022018	NNT	100.665	41.2438	up	0.954575	0.00304829	0.00359259
TCONS_00044733	1.175	0.0998624	up	TCONS_00057831	ENSSSCG00000029674	20.4749	6.52467	up	0.954651	0.00303817	0.00359106
TCONS_00044733	1.175	0.0998624	up	TCONS_00008821	MEOX1	6.50521	0.900216	up	0.954925	0.00300187	0.003586
TCONS_00044733	1.175	0.0998624	up	TCONS_00038245	ENSSSCG00000022983	4.95249	1.8638	up	0.955835	0.00288271	0.00356643
TCONS_00044733	1.175	0.0998624	up	TCONS_00049411	PLA2G7	13.4041	4.29396	up	0.958546	0.00254205	0.00351395
TCONS_00044733	1.175	0.0998624	up	TCONS_00010503	ENSSSCG00000017624	6.40509	2.94812	up	0.961448	0.00220073	0.00345841
TCONS_00044733	1.175	0.0998624	up	TCONS_00052970	TRIM68	3.14235	1.03374	up	0.96159	0.00218466	0.00345376
TCONS_00044733	1.175	0.0998624	up	TCONS_00044561	BLVRB	11.2524	4.73421	up	0.961952	0.00214399	0.00344548
TCONS_00044733	1.175	0.0998624	up	TCONS_00037285	LY96	4.468	1.73043	up	0.961978	0.00214104	0.0034442
TCONS_00044733	1.175	0.0998624	up	TCONS_00036600	DBT	13.4876	7.23553	up	0.963132	0.00201378	0.00341455
TCONS_00044733	1.175	0.0998624	up	TCONS_00017610	FZD10	1.13313	0.272201	up	0.963138	0.00201315	0.00341433
TCONS_00044733	1.175	0.0998624	up	TCONS_00023110	ENSSSCG00000025527	310.603	59.1574	up	0.964003	0.00192034	0.00339855
TCONS_00044733	1.175	0.0998624	up	TCONS_00037842	S100A1	312.599	71.2868	up	0.964278	0.0018913	0.00339335
TCONS_00044733	1.175	0.0998624	up	TCONS_00020942	ENSSSCG00000015886	8.49375	4.05223	up	0.96476	0.00184092	0.00337747
TCONS_00044733	1.175	0.0998624	up	TCONS_00006612	TNNI1	4706.74	1580.1	up	0.965463	0.0017686	0.00336096
TCONS_00044733	1.175	0.0998624	up	TCONS_00024879	ENSSSCG00000021753	2.86621	0.708739	up	0.965692	0.0017454	0.00335422
TCONS_00044733	1.175	0.0998624	up	TCONS_00022545	ENSSSCG00000029546	164.688	56.7584	up	0.967815	0.00153717	0.0032779
TCONS_00044733	1.175	0.0998624	up	TCONS_00032964	ENSSSCG00000020972	71.6305	27.0346	up	0.970073	0.00133007	0.00319791
TCONS_00044733	1.175	0.0998624	up	TCONS_00044387	ENSSSCG00000023498	72.5795	12.9191	up	0.970487	0.00129366	0.00318144
TCONS_00044733	1.175	0.0998624	up	TCONS_00027490	PLIN5	7.87994	1.54266	up	0.97059	0.00128469	0.00317705
TCONS_00044733	1.175	0.0998624	up	TCONS_00007487	ENSSSCG00000024244	3.92363	0.91716	up	0.970741	0.0012716	0.00317394
TCONS_00044733	1.175	0.0998624	up	TCONS_00029321	CSRP3	1349.26	131.831	up	0.971121	0.00123894	0.00316438
TCONS_00044733	1.175	0.0998624	up	TCONS_00046196	CPT2	14.0243	3.27652	up	0.97181	0.00118078	0.00314027
TCONS_00044733	1.175	0.0998624	up	TCONS_00057332	ENSSSCG00000028686	7.08007	2.44248	up	0.97183	0.00117916	0.00313952
TCONS_00044733	1.175	0.0998624	up	TCONS_00001368	ALPK2	10.4173	2.87231	up	0.971899	0.00117344	0.00313684
TCONS_00044733	1.175	0.0998624	up	TCONS_00057973	TMEM120A	8.93273	2.00476	up	0.971967	0.00116772	0.00313518
TCONS_00044733	1.175	0.0998624	up	TCONS_00065296	KLHL13	2.10396	0.835587	up	0.972004	0.00116466	0.00313277
TCONS_00044733	1.175	0.0998624	up	TCONS_00012947	CPOX	12.5858	6.69188	up	0.973043	0.00108021	0.00309391
TCONS_00044733	1.175	0.0998624	up	TCONS_00041269	ACSS3	9.31356	2.23742	up	0.973189	0.00106862	0.00308707
TCONS_00044733	1.175	0.0998624	up	TCONS_00030607	PPP2CA	119.252	54.1942	up	0.973204	0.00106739	0.00308657
TCONS_00044733	1.175	0.0998624	up	TCONS_00029300	SVIP	8.02954	3.6039	up	0.973399	0.001052	0.00307987
TCONS_00044733	1.175	0.0998624	up	TCONS_00043252	FABP3	965.982	204.083	up	0.973876	0.00101476	0.00305885
TCONS_00044733	1.175	0.0998624	up	TCONS_00002976	L3MBTL3	2.99751	1.38755	up	0.974103	0.000997302	0.00304823
TCONS_00044733	1.175	0.0998624	up	TCONS_00014445	TNIK	4.39484	1.73607	up	0.974397	0.000974895	0.00303637
TCONS_00044733	1.175	0.0998624	up	TCONS_00017737	MYL2	12688.2	3994.43	up	0.974447	0.000971069	0.00303302
TCONS_00044733	1.175	0.0998624	up	TCONS_00002095	FSD1L	7.44057	1.17475	up	0.974478	0.000968751	0.0030325
TCONS_00044733	1.175	0.0998624	up	TCONS_00048250	ESRRB	4.15711	0.859231	up	0.976132	0.00084769	0.00298112
TCONS_00044733	1.175	0.0998624	up	TCONS_00025483	TRIM24	15.7626	7.23376	up	0.979122	0.000649268	0.00284078
TCONS_00044733	1.175	0.0998624	up	TCONS_00012979	ENSSSCG00000012000	25.9347	7.86458	up	0.979429	0.000630401	0.00282318
TCONS_00044733	1.175	0.0998624	up	TCONS_00045737	NT5C1A	35.8749	16.6196	up	0.979534	0.000624023	0.00281624
TCONS_00044733	1.175	0.0998624	up	TCONS_00042381	FUT2	0.557494	0.180883	up	0.980461	0.00056891	0.00277258
TCONS_00044733	1.175	0.0998624	up	TCONS_00029608	ENSSSCG00000013768	5.82298	11.3447	down	-0.98091	0.000543139	0.00274467
TCONS_00044733	1.175	0.0998624	up	TCONS_00024091	MAVS	33.3229	10.469	up	0.981449	0.000513042	0.00270409
TCONS_00044733	1.175	0.0998624	up	TCONS_00062280	GK	2.99856	0.426211	up	0.982533	0.000454989	0.00262882
TCONS_00044733	1.175	0.0998624	up	TCONS_00036491	SLC16A1	28.4458	11.2318	up	0.983215	0.00042024	0.00259352
TCONS_00044733	1.175	0.0998624	up	TCONS_00040342	ZNF385A	17.3762	1.89542	up	0.983345	0.000413756	0.00258262
TCONS_00044733	1.175	0.0998624	up	TCONS_00050095	ACOT6	6.21597	2.1249	up	0.98446	0.000360383	0.00250322
TCONS_00044733	1.175	0.0998624	up	TCONS_00040344	ZNF385A	6.04723	0.749864	up	0.985198	0.000327014	0.00244092
TCONS_00044733	1.175	0.0998624	up	TCONS_00018636	PANK1	5.84306	1.22555	up	0.98524	0.000325191	0.00243701
TCONS_00044733	1.175	0.0998624	up	TCONS_00000363	ROS1	0.889086	0.199703	up	0.985514	0.000313264	0.00242647
TCONS_00044733	1.175	0.0998624	up	TCONS_00036444	CASQ2	17.7354	3.40275	up	0.985743	0.00030343	0.00240639
TCONS_00044733	1.175	0.0998624	up	TCONS_00045494	ENSSSCG00000003546	855.148	75.7926	up	0.986231	0.000283055	0.00235963
TCONS_00044733	1.175	0.0998624	up	TCONS_00053951	SNORD93	0.968913	0.31069	up	0.986637	0.000266646	0.00233823
TCONS_00044733	1.175	0.0998624	up	TCONS_00054332	SLC30A1	1.23019	0.551812	up	0.987329	0.000239832	0.00228416
TCONS_00044733	1.175	0.0998624	up	TCONS_00027157	ssc-mir-27a	2.34389	0.621032	up	0.987407	0.000236865	0.00227473
TCONS_00044733	1.175	0.0998624	up	TCONS_00037935	ADAMTSL4	5.44116	0.307926	up	0.988568	0.000195285	0.00219843
TCONS_00044733	1.175	0.0998624	up	TCONS_00008211	BIVM	12.9127	3.82068	up	0.988729	0.000189821	0.0021768
TCONS_00044733	1.175	0.0998624	up	TCONS_00059039	ENSSSCG00000025012	5.33472	1.47634	up	0.989402	0.000167896	0.00211511
TCONS_00044733	1.175	0.0998624	up	TCONS_00049827	MYH6	41.0606	6.98164	up	0.989473	0.000165657	0.00210698
TCONS_00044733	1.175	0.0998624	up	TCONS_00047836	PRKD1	4.80575	1.39785	up	0.991297	0.000113279	0.00196103
TCONS_00044733	1.175	0.0998624	up	TCONS_00051081	TECRL	16.4024	2.04873	up	0.991403	0.000110543	0.00194538
TCONS_00044733	1.175	0.0998624	up	TCONS_00054782	ME3	11.7411	2.71259	up	0.992134	9.26e-05	0.0018521
TCONS_00044733	1.175	0.0998624	up	TCONS_00055470	SLC25A13	5.20129	0.790413	up	0.992739	7.89e-05	0.00178201
TCONS_00044733	1.175	0.0998624	up	TCONS_00003056	SLC35F1	3.21882	0.678517	up	0.993212	6.9e-05	0.00170546
TCONS_00044733	1.175	0.0998624	up	TCONS_00021387	IDH1	10.3433	2.99481	up	0.99373	5.88e-05	0.00161513
TCONS_00044733	1.175	0.0998624	up	TCONS_00045047	SBK2	9.5605	0.0657332	up	0.99381	5.74e-05	0.0015995
TCONS_00044733	1.175	0.0998624	up	TCONS_00003052	PLN	348.595	87.994	up	0.994646	4.29e-05	0.00143153
TCONS_00044733	1.175	0.0998624	up	TCONS_00052427	MYOZ2	3281.67	588.705	up	0.995016	3.72e-05	0.00133464
TCONS_00044733	1.175	0.0998624	up	TCONS_00051083	TECRL	96.502	11.7812	up	0.996603	1.73e-05	0.000945288
TCONS_00044733	1.175	0.0998624	up	TCONS_00052373	ABHD18	6.01802	1.22238	up	0.997641	8.34e-06	0.00058035
TCONS_00044733	1.175	0.0998624	up	TCONS_00012341	MME	6.89213	1.50062	up	0.998742	2.37e-06	0.000232189
TCONS_00044733	1.175	0.0998624	up	TCONS_00059083	MYOM3	120.539	13.6375	up	0.998888	1.85e-06	0.000188693
TCONS_00044733	1.175	0.0998624	up	TCONS_00049458	DNAJA4	56.8649	16.3427	up	0.99925	8.43e-07	0.000126039
TCONS_00044733	1.175	0.0998624	up	TCONS_00018602	PRKG1	14.6779	2.34528	up	0.99986	2.94e-08	5.37e-06
TCONS_00056305	0.452155	2.15888	down	TCONS_00029383	ENSSSCG00000013400	5.46772	58.1583	down	0.96368	0.00195476	0.00340436
TCONS_00056305	0.452155	2.15888	down	TCONS_00015592	ENSSSCG00000009638	1.22008	4.22722	down	0.971606	0.00119784	0.00314703
TCONS_00056305	0.452155	2.15888	down	TCONS_00029601	DNAJB1	10.9756	39.5018	down	0.984916	0.000339563	0.00246319
TCONS_00056305	0.452155	2.15888	down	TCONS_00061811	ENSSSCG00000024464	0.577399	2.29792	down	0.989244	0.000172914	0.00213602
TCONS_00056305	0.452155	2.15888	down	TCONS_00060739	HSP70.2	350.387	1059.43	down	0.998418	3.75e-06	0.000335595
TCONS_00059011	1172.25	2520.99	down	TCONS_00045737	NT5C1A	35.8749	16.6196	up	-0.950058	0.00367906	0.00368653
TCONS_00059011	1172.25	2520.99	down	TCONS_00060616	ENSSSCG00000021703	70.398	246.601	down	0.95199	0.00340208	0.00365142
TCONS_00059011	1172.25	2520.99	down	TCONS_00000795	ENSSSCG00000023568	6.2646	2.97698	up	-0.953065	0.00325271	0.00362655
TCONS_00059011	1172.25	2520.99	down	TCONS_00031448	ENSSSCG00000027890	12.4016	6.05353	up	-0.955881	0.00287673	0.00356602
TCONS_00059011	1172.25	2520.99	down	TCONS_00048615	ENSSSCG00000020858	5.78281	3.08089	up	-0.956455	0.00280296	0.00355594
TCONS_00059011	1172.25	2520.99	down	TCONS_00003924	IGF1R	0.510611	0.182364	up	-0.957424	0.00268051	0.00354161
TCONS_00059011	1172.25	2520.99	down	TCONS_00026760	KCNJ11	18.8797	39.3824	down	0.95835	0.00256597	0.00351977
TCONS_00059011	1172.25	2520.99	down	TCONS_00023484	ENSSSCG00000025673	7.34167	16.9312	down	0.962496	0.00208347	0.00343048
TCONS_00059011	1172.25	2520.99	down	TCONS_00034424	ENSSSCG00000026974	30.0533	13.7151	up	-0.963566	0.001967	0.00340636
TCONS_00059011	1172.25	2520.99	down	TCONS_00028641	LRP5	7.76538	3.24102	up	-0.964633	0.00185409	0.00338059
TCONS_00059011	1172.25	2520.99	down	TCONS_00039263	TMEM19	10.3554	5.57917	up	-0.967907	0.00152838	0.00327486
TCONS_00059011	1172.25	2520.99	down	TCONS_00012448	ENSSSCG00000011765	77.2794	33.7261	up	-0.970124	0.00132549	0.0031941
TCONS_00059011	1172.25	2520.99	down	TCONS_00014490	USP13	46.3477	19.8469	up	-0.986427	0.00027507	0.00234343
TCONS_00059011	1172.25	2520.99	down	TCONS_00021130	SESTD1	6.21984	3.06583	up	-0.9972	1.18e-05	0.00073873
TCONS_00061360	1.9253	0.540033	up	TCONS_00041269	ACSS3	9.31356	2.23742	up	0.951305	0.00349903	0.00366523
TCONS_00061360	1.9253	0.540033	up	TCONS_00033278	ENSSSCG00000028513	5.5054	13.7404	down	-0.951587	0.00345894	0.00365975
TCONS_00061360	1.9253	0.540033	up	TCONS_00059083	MYOM3	120.539	13.6375	up	0.951638	0.00345173	0.00365914
TCONS_00061360	1.9253	0.540033	up	TCONS_00043562	FHOD3	5.82494	1.63695	up	0.951825	0.00342534	0.00365391
TCONS_00061360	1.9253	0.540033	up	TCONS_00024913	AKR1B1	95.2159	48.934	up	0.951838	0.00342345	0.00365367
TCONS_00061360	1.9253	0.540033	up	TCONS_00060440	ADSSL1	201.671	405.657	down	-0.951967	0.00340541	0.00365205
TCONS_00061360	1.9253	0.540033	up	TCONS_00003291	DDO	9.65174	3.56692	up	0.952722	0.00329994	0.0036341
TCONS_00061360	1.9253	0.540033	up	TCONS_00047604	HOMER2	113.462	37.2565	up	0.952823	0.003286	0.0036315
TCONS_00061360	1.9253	0.540033	up	TCONS_00046258	MAST2	7.45429	1.73362	up	0.953055	0.00325399	0.00362679
TCONS_00061360	1.9253	0.540033	up	TCONS_00051083	TECRL	96.502	11.7812	up	0.953407	0.00320583	0.00362032
TCONS_00061360	1.9253	0.540033	up	TCONS_00017610	FZD10	1.13313	0.272201	up	0.953907	0.00313782	0.00361006
TCONS_00061360	1.9253	0.540033	up	TCONS_00012351	PTX3	0.737444	2.17031	down	-0.953924	0.00313563	0.00360958
TCONS_00061360	1.9253	0.540033	up	TCONS_00046127	ENSSSCG00000003812	556.451	2539.92	down	-0.954345	0.00307901	0.00359818
TCONS_00061360	1.9253	0.540033	up	TCONS_00049827	MYH6	41.0606	6.98164	up	0.954891	0.00300637	0.00358687
TCONS_00061360	1.9253	0.540033	up	TCONS_00002998	RSPO3	8.88137	1.64405	up	0.955356	0.00294511	0.00357654
TCONS_00061360	1.9253	0.540033	up	TCONS_00047764	PKM	493.811	2631.88	down	-0.95552	0.00292373	0.00357226
TCONS_00061360	1.9253	0.540033	up	TCONS_00045047	SBK2	9.5605	0.0657332	up	0.955752	0.00289349	0.00356875
TCONS_00061360	1.9253	0.540033	up	TCONS_00018312	ENSSSCG00000028327	7.91025	25.1169	down	-0.955866	0.00287869	0.00356618
TCONS_00061360	1.9253	0.540033	up	TCONS_00011136	MYH10	2.22581	0.908796	up	0.955923	0.00287141	0.00356508
TCONS_00061360	1.9253	0.540033	up	TCONS_00036600	DBT	13.4876	7.23553	up	0.956014	0.00285958	0.00356386
TCONS_00061360	1.9253	0.540033	up	TCONS_00036566	ENSSSCG00000006839	16.4731	37.5475	down	-0.956196	0.00283619	0.00355972
TCONS_00061360	1.9253	0.540033	up	TCONS_00031922	TIGD7	0.793723	2.51378	down	-0.95717	0.00271236	0.00354662
TCONS_00061360	1.9253	0.540033	up	TCONS_00018902	GPAM	13.7721	2.41091	up	0.957645	0.00265287	0.00353712
TCONS_00061360	1.9253	0.540033	up	TCONS_00051081	TECRL	16.4024	2.04873	up	0.957996	0.00260942	0.00352725
TCONS_00061360	1.9253	0.540033	up	TCONS_00024091	MAVS	33.3229	10.469	up	0.958527	0.0025444	0.00351456
TCONS_00061360	1.9253	0.540033	up	TCONS_00053951	SNORD93	0.968913	0.31069	up	0.958728	0.00251996	0.00350826
TCONS_00061360	1.9253	0.540033	up	TCONS_00003056	SLC35F1	3.21882	0.678517	up	0.958849	0.00250529	0.00350544
TCONS_00061360	1.9253	0.540033	up	TCONS_00021387	IDH1	10.3433	2.99481	up	0.95909	0.00247626	0.00350065
TCONS_00061360	1.9253	0.540033	up	TCONS_00043252	FABP3	965.982	204.083	up	0.959121	0.00247243	0.00349986
TCONS_00061360	1.9253	0.540033	up	TCONS_00053187	FOLH1B	7.36243	2.60224	up	0.959278	0.00245366	0.00349668
TCONS_00061360	1.9253	0.540033	up	TCONS_00026731	LDHA	1598.34	7399.69	down	-0.960017	0.00236603	0.00348489
TCONS_00061360	1.9253	0.540033	up	TCONS_00031550	PHKG1	26.6932	72.2815	down	-0.960351	0.00232693	0.00347743
TCONS_00061360	1.9253	0.540033	up	TCONS_00032810	HADHA	221.449	78.7154	up	0.960752	0.00228041	0.00346899
TCONS_00061360	1.9253	0.540033	up	TCONS_00041703	RSPRY1	3.64641	6.69655	down	-0.960992	0.00225272	0.00346652
TCONS_00061360	1.9253	0.540033	up	TCONS_00019673	GPD2	5.14608	23.7071	down	-0.961037	0.00224765	0.00346579
TCONS_00061360	1.9253	0.540033	up	TCONS_00032964	ENSSSCG00000020972	71.6305	27.0346	up	0.961588	0.0021849	0.00345376
TCONS_00061360	1.9253	0.540033	up	TCONS_00037609	ATP1A4	7.95453	4.04591	up	0.961651	0.00217777	0.00345262
TCONS_00061360	1.9253	0.540033	up	TCONS_00023934	SLC20A2	8.02313	3.09913	up	0.961694	0.00217295	0.00345137
TCONS_00061360	1.9253	0.540033	up	TCONS_00036461	AMPD1	141.828	430.54	down	-0.962954	0.00203315	0.0034192
TCONS_00061360	1.9253	0.540033	up	TCONS_00025204	PPIA	73.1669	224.365	down	-0.963516	0.00197229	0.00340724
TCONS_00061360	1.9253	0.540033	up	TCONS_00002364	SLC25A25	22.3999	58.2602	down	-0.963759	0.00194631	0.00340327
TCONS_00061360	1.9253	0.540033	up	TCONS_00054781	ME3	8.72301	2.44203	up	0.964698	0.00184733	0.00337933
TCONS_00061360	1.9253	0.540033	up	TCONS_00002095	FSD1L	7.44057	1.17475	up	0.96493	0.00182329	0.00337634
TCONS_00061360	1.9253	0.540033	up	TCONS_00018694	ENSSSCG00000010493	46.7682	18.8721	up	0.965248	0.00179058	0.00336775
TCONS_00061360	1.9253	0.540033	up	TCONS_00012011	LMCD1	234.893	61.3474	up	0.965347	0.00178043	0.00336315
TCONS_00061360	1.9253	0.540033	up	TCONS_00009432	ENSSSCG00000017796	34.4322	73.314	down	-0.965946	0.00171979	0.00334432
TCONS_00061360	1.9253	0.540033	up	TCONS_00040344	ZNF385A	6.04723	0.749864	up	0.966937	0.00162167	0.00331088
TCONS_00061360	1.9253	0.540033	up	TCONS_00019868	HOXD9	2.4057	8.08235	down	-0.967482	0.00156891	0.0032917
TCONS_00061360	1.9253	0.540033	up	TCONS_00062280	GK	2.99856	0.426211	up	0.969057	0.00142138	0.00323558
TCONS_00061360	1.9253	0.540033	up	TCONS_00038166	GSTM2	15.39	63.0369	down	-0.969064	0.00142074	0.00323544
TCONS_00061360	1.9253	0.540033	up	TCONS_00036491	SLC16A1	28.4458	11.2318	up	0.969461	0.00138467	0.00322229
TCONS_00061360	1.9253	0.540033	up	TCONS_00062016	CLCN4	8.48803	3.57187	up	0.969493	0.00138186	0.00322152
TCONS_00061360	1.9253	0.540033	up	TCONS_00029608	ENSSSCG00000013768	5.82298	11.3447	down	-0.969662	0.00136664	0.00321518
TCONS_00061360	1.9253	0.540033	up	TCONS_00016934	ANKRD2	379.857	54.6447	up	0.969871	0.001348	0.00320502
TCONS_00061360	1.9253	0.540033	up	TCONS_00005852	ZBTB18	30.2575	62.5352	down	-0.970113	0.00132652	0.00319467
TCONS_00061360	1.9253	0.540033	up	TCONS_00033378	MAZ	31.6352	69.2704	down	-0.970208	0.00131816	0.00319255
TCONS_00061360	1.9253	0.540033	up	TCONS_00045494	ENSSSCG00000003546	855.148	75.7926	up	0.970562	0.00128716	0.00317752
TCONS_00061360	1.9253	0.540033	up	TCONS_00000361	ROS1	1.83544	0.241133	up	0.971086	0.00124193	0.00316568
TCONS_00061360	1.9253	0.540033	up	TCONS_00019834	PDK1	7.81607	2.45712	up	0.971755	0.00118544	0.00314178
TCONS_00061360	1.9253	0.540033	up	TCONS_00015955	TBX3	3.59756	0.665723	up	0.972352	0.00113604	0.00311913
TCONS_00061360	1.9253	0.540033	up	TCONS_00017815	ALDH2	112.722	219.495	down	-0.972677	0.0011096	0.00311078
TCONS_00061360	1.9253	0.540033	up	TCONS_00013491	ENSSSCG00000011324	0.908638	0.258382	up	0.973324	0.00105795	0.00308063
TCONS_00061360	1.9253	0.540033	up	TCONS_00018833	PITX3	6.25137	1.4001	up	0.973372	0.00105416	0.00308018
TCONS_00061360	1.9253	0.540033	up	TCONS_00023110	ENSSSCG00000025527	310.603	59.1574	up	0.974256	0.000985577	0.00304292
TCONS_00061360	1.9253	0.540033	up	TCONS_00002163	HSDL2	69.0371	26.4747	up	0.975921	0.000862712	0.00298904
TCONS_00061360	1.9253	0.540033	up	TCONS_00061454	ENSSSCG00000020894	2.76673	0.294118	up	0.977102	0.000780447	0.0029345
TCONS_00061360	1.9253	0.540033	up	TCONS_00002976	L3MBTL3	2.99751	1.38755	up	0.977643	0.000744174	0.00291139
TCONS_00061360	1.9253	0.540033	up	TCONS_00013168	PFKL	3.4361	1.08927	up	0.977907	0.000726771	0.00289893
TCONS_00061360	1.9253	0.540033	up	TCONS_00022018	NNT	100.665	41.2438	up	0.978328	0.000699417	0.00288116
TCONS_00061360	1.9253	0.540033	up	TCONS_00014316	PFN2	10.3947	3.28477	up	0.978815	0.000668471	0.00285732
TCONS_00061360	1.9253	0.540033	up	TCONS_00052970	TRIM68	3.14235	1.03374	up	0.97883	0.000667507	0.00285684
TCONS_00061360	1.9253	0.540033	up	TCONS_00064653	PFKFB1	20.6944	58.0425	down	-0.979489	0.000626752	0.00281722
TCONS_00061360	1.9253	0.540033	up	TCONS_00026263	MACROD1	299.811	560.348	down	-0.979634	0.000617949	0.00281163
TCONS_00061360	1.9253	0.540033	up	TCONS_00040342	ZNF385A	17.3762	1.89542	up	0.97979	0.000608515	0.00280444
TCONS_00061360	1.9253	0.540033	up	TCONS_00042090	FAM98C	3.21315	7.77941	down	-0.980496	0.000566907	0.0027696
TCONS_00061360	1.9253	0.540033	up	TCONS_00051029	ETFDH	161.699	54.2712	up	0.980783	0.000550405	0.0027536
TCONS_00061360	1.9253	0.540033	up	TCONS_00056373	HSPB7	320.217	65.9266	up	0.982585	0.000452275	0.00262783
TCONS_00061360	1.9253	0.540033	up	TCONS_00044387	ENSSSCG00000023498	72.5795	12.9191	up	0.982753	0.000443598	0.0026204
TCONS_00061360	1.9253	0.540033	up	TCONS_00013167	PFKL	8.30767	0.942442	up	0.982856	0.000438366	0.00261575
TCONS_00061360	1.9253	0.540033	up	TCONS_00014391	B3GALNT1	3.66259	1.15745	up	0.982868	0.000437747	0.00261575
TCONS_00061360	1.9253	0.540033	up	TCONS_00061335	PDLIM1	21.3824	7.03069	up	0.982926	0.000434773	0.00261439
TCONS_00061360	1.9253	0.540033	up	TCONS_00023060	ENSSSCG00000026968	10.6567	4.64761	up	0.983112	0.000425409	0.00260189
TCONS_00061360	1.9253	0.540033	up	TCONS_00062898	ENSSSCG00000012439	368.798	1151.42	down	-0.9833	0.000416001	0.00258709
TCONS_00061360	1.9253	0.540033	up	TCONS_00017336	INPP5A	7.97831	2.02816	up	0.983934	0.000385085	0.00254505
TCONS_00061360	1.9253	0.540033	up	TCONS_00028711	ENSSSCG00000030087	1.03999	6.53122	down	-0.984161	0.000374344	0.00252656
TCONS_00061360	1.9253	0.540033	up	TCONS_00022545	ENSSSCG00000029546	164.688	56.7584	up	0.98431	0.000367356	0.00251572
TCONS_00061360	1.9253	0.540033	up	TCONS_00026619	ABTB2	1.12197	0.220796	up	0.985193	0.00032724	0.00244137
TCONS_00061360	1.9253	0.540033	up	TCONS_00029321	CSRP3	1349.26	131.831	up	0.985454	0.000315843	0.00242849
TCONS_00061360	1.9253	0.540033	up	TCONS_00021956	SKP2	1.3453	3.34085	down	-0.985932	0.00029545	0.00238798
TCONS_00061360	1.9253	0.540033	up	TCONS_00056275	ENSSSCG00000022362	52.825	99.0197	down	-0.986193	0.000284628	0.00236493
TCONS_00061360	1.9253	0.540033	up	TCONS_00062637	TSR2	41.4954	12.2017	up	0.98649	0.000272555	0.00233839
TCONS_00061360	1.9253	0.540033	up	TCONS_00064865	PGK1	496.621	1931.89	down	-0.986749	0.000262225	0.00233
TCONS_00061360	1.9253	0.540033	up	TCONS_00008821	MEOX1	6.50521	0.900216	up	0.988131	0.000210463	0.00222298
TCONS_00061360	1.9253	0.540033	up	TCONS_00000700	ME2	13.5749	4.15516	up	0.989068	0.000178607	0.00215096
TCONS_00061360	1.9253	0.540033	up	TCONS_00025612	LMOD2	253.969	69.9839	up	0.989142	0.000176202	0.00214774
TCONS_00061360	1.9253	0.540033	up	TCONS_00025613	LMOD2	570.04	155.699	up	0.990404	0.000137687	0.00203957
TCONS_00061360	1.9253	0.540033	up	TCONS_00057965	ENSSSCG00000027994	6.12754	1.71365	up	0.992095	9.35e-05	0.00185812
TCONS_00061360	1.9253	0.540033	up	TCONS_00021395	ACADL	81.2903	30.6048	up	0.992408	8.62e-05	0.00183378
TCONS_00061360	1.9253	0.540033	up	TCONS_00014317	PFN2	153.238	43.0444	up	0.993856	5.65e-05	0.0015887
TCONS_00061360	1.9253	0.540033	up	TCONS_00018149	ACTN2	1740.66	438.297	up	0.994063	5.28e-05	0.00155389
TCONS_00061360	1.9253	0.540033	up	TCONS_00057963	CPT1B	95.0175	21.7073	up	0.994459	4.6e-05	0.00147377
TCONS_00061360	1.9253	0.540033	up	TCONS_00044561	BLVRB	11.2524	4.73421	up	0.99475	4.13e-05	0.00140372
TCONS_00061360	1.9253	0.540033	up	TCONS_00065285	IL13RA1	30.0607	10.9414	up	0.994844	3.98e-05	0.00138133
TCONS_00061360	1.9253	0.540033	up	TCONS_00042971	SLC25A34	30.7792	9.39264	up	0.994871	3.94e-05	0.00137256
TCONS_00061360	1.9253	0.540033	up	TCONS_00017874	ACACB	13.9582	6.32716	up	0.995823	2.61e-05	0.00116975
TCONS_00061360	1.9253	0.540033	up	TCONS_00057831	ENSSSCG00000029674	20.4749	6.52467	up	0.996951	1.39e-05	0.0008227
TCONS_00061360	1.9253	0.540033	up	TCONS_00048205	ENSSSCG00000002351	52.6037	4.6191	up	0.996993	1.35e-05	0.000808885
TCONS_00061360	1.9253	0.540033	up	TCONS_00054977	CRYAB	876.24	262.322	up	0.997081	1.28e-05	0.000781192
TCONS_00061360	1.9253	0.540033	up	TCONS_00045357	SLC25A34	34.6109	8.7955	up	0.998993	1.52e-06	0.000160003
TCONS_00061360	1.9253	0.540033	up	TCONS_00047561	ZFAND6	102.239	198.665	down	-0.999155	1.07e-06	0.000135492
TCONS_00061633	18.5669	48.5976	down	TCONS_00023885	ENSSSCG00000006989	11.4958	30.7991	down	0.951304	0.00349925	0.00366523
TCONS_00061633	18.5669	48.5976	down	TCONS_00056544	RNASEH2B	5.74892	12.601	down	0.953753	0.00315874	0.0036141
TCONS_00061633	18.5669	48.5976	down	TCONS_00009659	ENSSSCG00000018006	4056.1	23082.1	down	0.954336	0.00308016	0.00359847
TCONS_00061633	18.5669	48.5976	down	TCONS_00029383	ENSSSCG00000013400	5.46772	58.1583	down	0.955209	0.00296447	0.00358028
TCONS_00061633	18.5669	48.5976	down	TCONS_00004770	NIPSNAP3A	0.592743	1.95093	down	0.955938	0.0028694	0.00356507
TCONS_00061633	18.5669	48.5976	down	TCONS_00011063	ATP1B2	0.712175	4.73273	down	0.957177	0.00271142	0.00354662
TCONS_00061633	18.5669	48.5976	down	TCONS_00043721	DHCR24	1.27476	2.84518	down	0.962515	0.00208131	0.00343048
TCONS_00061633	18.5669	48.5976	down	TCONS_00029601	DNAJB1	10.9756	39.5018	down	0.965767	0.00173778	0.00335105
TCONS_00061633	18.5669	48.5976	down	TCONS_00008634	PRKCA	5.50631	13.2708	down	0.972377	0.00113405	0.00311847
TCONS_00061633	18.5669	48.5976	down	TCONS_00051393	ENSSSCG00000009112	1.18267	3.25083	down	0.973747	0.0010248	0.00306473
TCONS_00061633	18.5669	48.5976	down	TCONS_00015592	ENSSSCG00000009638	1.22008	4.22722	down	0.977603	0.000746818	0.00291309
TCONS_00061633	18.5669	48.5976	down	TCONS_00033486	GPRC5B	4.5929	14.2676	down	0.978654	0.000678597	0.00286956
TCONS_00061633	18.5669	48.5976	down	TCONS_00015588	ENSSSCG00000027496	0.764488	4.20901	down	0.991784	0.000100988	0.00188801
TCONS_00064940	0.438733	8.16997	down	TCONS_00020235	ATIC	2.49418	8.75514	down	0.951056	0.00353463	0.00366985
TCONS_00064940	0.438733	8.16997	down	TCONS_00056818	ENSSSCG00000021557	1.82145	6.94673	down	0.955422	0.00293646	0.00357415
TCONS_00064940	0.438733	8.16997	down	TCONS_00034424	ENSSSCG00000026974	30.0533	13.7151	up	-0.958124	0.00259371	0.00352422
TCONS_00064940	0.438733	8.16997	down	TCONS_00040732	ABCC9	2.4789	4.87405	down	0.960729	0.00228305	0.00346936
TCONS_00064940	0.438733	8.16997	down	TCONS_00003678	LYSMD2	1.83645	16.0753	down	0.961384	0.00220796	0.00345966
TCONS_00064940	0.438733	8.16997	down	TCONS_00048418	CINP	34.7779	67.7779	down	0.965544	0.00176033	0.00335832
TCONS_00064940	0.438733	8.16997	down	TCONS_00023484	ENSSSCG00000025673	7.34167	16.9312	down	0.967863	0.00153256	0.00327646
TCONS_00064940	0.438733	8.16997	down	TCONS_00039644	TUBAL3	41.8437	104.377	down	0.971831	0.00117902	0.00313952
TCONS_00064940	0.438733	8.16997	down	TCONS_00048255	VASH1	0.412373	1.00401	down	0.975676	0.000880305	0.00299851
TCONS_00064940	0.438733	8.16997	down	TCONS_00008833	RND2	0.142984	0.555141	down	0.98555	0.000311715	0.00242453
TCONS_00064940	0.438733	8.16997	down	TCONS_00058552	LRRC30	1.07554	8.64084	down	0.994317	4.84e-05	0.001507
